# Supplementary material
Source: HighWire-hosted journal article supplement (https://jitc.bmj.com/content/12/4/e008078)
Supplement: inline-supplementary-material-8 [file inline-supplementary-material-8.xlsx]

## Sheet: DE Results Day 7
	logFC	AveExpr	t	P.Value	adj.P.Val	B	SYMBOL	ENTREZID	ENSEMBL
ENSMUSG00000015568_Lpl	1.96874	6.10676	7.65661	1.39836e-07	0.00129231	7.48365	Lpl	16956	ENSMUSG00000015568
ENSMUSG00000015396_Cd83	2.24617	1.18514	7.30198	2.95735e-07	0.00129231	6.87564	Cd83	12522	ENSMUSG00000015396
ENSMUSG00000002233_Rhoc	1.20398	3.87429	7.29621	2.99399e-07	0.00129231	6.82053	Rhoc	11853	ENSMUSG00000002233
ENSMUSG00000008496_Pou2f2	2.38075	1.83788	6.91399	6.84096e-07	0.00142747	6.13483	Pou2f2	18987	ENSMUSG00000008496
ENSMUSG00000020681_Ace	2.05029	0.408575	6.88818	7.23861e-07	0.00142747	5.86475	Ace	11421	ENSMUSG00000020681
ENSMUSG00000020400_Tnip1	0.837902	3.50648	6.80943	8.60481e-07	0.00142747	5.80061	Tnip1	57783	ENSMUSG00000020400
ENSMUSG00000020120_Plek	2.55132	2.64921	6.75158	9.77533e-07	0.00142747	5.76404	Plek	56193	ENSMUSG00000020120
ENSMUSG00000029417_Cxcl9	2.33943	5.52737	6.8374	8.09153e-07	0.00142747	5.76239	Cxcl9	17329	ENSMUSG00000029417
ENSMUSG00000025225_Nfkb2	1.17766	3.33545	6.74486	9.92144e-07	0.00142747	5.67512	Nfkb2	18034	ENSMUSG00000025225
ENSMUSG00000026628_Atf3	2.04034	1.51308	6.62666	1.28935e-06	0.0014358	5.51672	Atf3	11910	ENSMUSG00000026628
ENSMUSG00000044827_Tlr1	2.6653	1.16735	6.58658	1.40971e-06	0.0014358	5.41767	Tlr1	21897	ENSMUSG00000044827
ENSMUSG00000002983_Relb	1.76522	1.85243	6.45918	1.87468e-06	0.0014358	5.16593	Relb	19698	ENSMUSG00000002983
ENSMUSG00000062825_Actg1	1.42502	7.51171	6.55358	1.51745e-06	0.0014358	5.09797	Actg1	11465	ENSMUSG00000062825
ENSMUSG00000001525_Tubb5	1.07569	6.76339	6.54879	1.53377e-06	0.0014358	5.06966	Tubb5	22154	ENSMUSG00000001525
ENSMUSG00000030789_Itgax	2.82103	1.15641	6.37387	2.27155e-06	0.0014358	4.97602	Itgax	16411	ENSMUSG00000030789
ENSMUSG00000037902_Sirpa	1.80365	5.48132	6.45842	1.87788e-06	0.0014358	4.89409	Sirpa	19261	ENSMUSG00000037902
ENSMUSG00000054717_Hmgb2	1.78472	3.65359	6.39176	2.18174e-06	0.0014358	4.88264	Hmgb2	97165	ENSMUSG00000054717
ENSMUSG00000004266_Ptpn6	1.29113	4.86251	6.37506	2.26543e-06	0.0014358	4.71462	Ptpn6	15170	ENSMUSG00000004266
ENSMUSG00000040026_Saa3	3.38741	5.59952	6.32264	2.55027e-06	0.0014358	4.68531	Saa3	20210	ENSMUSG00000040026
ENSMUSG00000048621_Gm6377	2.77348	-0.0480447	6.36976	2.29271e-06	0.0014358	4.67933	Gm6377	622976	ENSMUSG00000048621
ENSMUSG00000075122_Cd80	1.93594	-0.649569	6.43505	1.97913e-06	0.0014358	4.64633	Cd80	12519	ENSMUSG00000075122
ENSMUSG00000046434_Hnrnpa1	0.873286	5.57008	6.35519	2.36935e-06	0.0014358	4.632	Hnrnpa1	15382	ENSMUSG00000046434
ENSMUSG00000042102_Dmgdh	-0.53543	8.52119	-6.32271	2.54985e-06	0.0014358	4.6116	Dmgdh	74129	ENSMUSG00000042102
ENSMUSG00000063286_Gvin-ps7	1.82895	1.93612	6.19419	3.41368e-06	0.001605	4.58432	NA	NA	ENSMUSG00000063286
ENSMUSG00000045730_Adrb2	1.9115	0.206641	6.25564	2.96849e-06	0.00147842	4.55557	Adrb2	11555	ENSMUSG00000045730
ENSMUSG00000035385_Ccl2	3.19976	0.773686	6.18674	3.47212e-06	0.001605	4.49263	Ccl2	20296	ENSMUSG00000035385
ENSMUSG00000029622_Arpc1b	1.15568	5.73644	6.29239	2.73101e-06	0.00147349	4.49157	Arpc1b	11867	ENSMUSG00000029622
ENSMUSG00000003348_Mob3a	1.17914	2.77913	6.15614	3.72303e-06	0.00160698	4.43308	Mob3a	208228	ENSMUSG00000003348
ENSMUSG00000041313_Slc7a1	2.13517	0.359425	6.17155	3.59448e-06	0.001605	4.4237	Slc7a1	11987	ENSMUSG00000041313
ENSMUSG00000021998_Lcp1	1.0557	6.67653	6.25744	2.95635e-06	0.00147842	4.41027	Lcp1	18826	ENSMUSG00000021998
ENSMUSG00000029581_Fscn1	1.21354	2.60009	6.1232	4.01397e-06	0.00167667	4.37272	Fscn1	14086	ENSMUSG00000029581
ENSMUSG00000022048_Dpysl2	1.11016	1.82474	6.08242	4.40665e-06	0.00172914	4.34641	Dpysl2	12934	ENSMUSG00000022048
ENSMUSG00000021196_Pfkp	1.56156	2.06193	6.08637	4.36695e-06	0.00172914	4.34378	Pfkp	56421	ENSMUSG00000021196
ENSMUSG00000055805_Fmnl1	1.92756	1.43042	6.00184	5.3021e-06	0.00189719	4.1778	Fmnl1	57778	ENSMUSG00000055805
ENSMUSG00000018819_Lsp1	1.70224	2.42323	6.02682	5.00616e-06	0.00185214	4.16852	Lsp1	16985	ENSMUSG00000018819
ENSMUSG00000026981_Il1rn	2.20981	1.55604	5.91741	6.44117e-06	0.00193983	3.99051	Il1rn	16181	ENSMUSG00000026981
ENSMUSG00000019189_Rnf145	0.829976	4.05452	5.96308	5.7971e-06	0.00192479	3.83759	Rnf145	74315	ENSMUSG00000019189
ENSMUSG00000030717_Nupr1	1.70175	0.826855	5.83872	7.7277e-06	0.00203775	3.78845	Nupr1	56312	ENSMUSG00000030717
ENSMUSG00000027962_Vcam1	1.46624	4.40242	5.9427	6.07595e-06	0.00193983	3.78059	Vcam1	22329	ENSMUSG00000027962
ENSMUSG00000023004_Tuba1b	1.10191	6.93552	5.98062	5.56748e-06	0.00189719	3.77678	Tuba1b	22143	ENSMUSG00000023004
ENSMUSG00000024300_Myo1f	2.36259	2.62738	5.82684	7.94364e-06	0.00203775	3.70322	Myo1f	17916	ENSMUSG00000024300
ENSMUSG00000031207_Msn	1.75631	5.29092	5.92709	6.29882e-06	0.00193983	3.67807	Msn	17698	ENSMUSG00000031207
ENSMUSG00000030403_Vasp	1.27524	4.6719	5.90235	6.66929e-06	0.00193983	3.64771	Vasp	22323	ENSMUSG00000030403
ENSMUSG00000024048_Myl12a	0.607736	5.64346	5.89771	6.74125e-06	0.00193983	3.57835	Myl12a	67268	ENSMUSG00000024048
ENSMUSG00000021262_Evl	2.19077	3.11165	5.79539	8.5452e-06	0.00208777	3.57518	Evl	14026	ENSMUSG00000021262
ENSMUSG00000049313_Sorl1	1.51687	1.58971	5.72015	1.01806e-05	0.00227686	3.55417	Sorl1	20660	ENSMUSG00000049313
ENSMUSG00000002603_Tgfb1	1.4359	3.92755	5.81593	8.14729e-06	0.00203775	3.52391	Tgfb1	21803	ENSMUSG00000002603
ENSMUSG00000026395_Ptprc	1.93676	4.05897	5.81404	8.1831e-06	0.00203775	3.50737	Ptprc	19264	ENSMUSG00000026395
ENSMUSG00000031799_Tpm4	1.06266	4.81057	5.82682	7.94405e-06	0.00203775	3.45949	Tpm4	326618	ENSMUSG00000031799
ENSMUSG00000039316_Rftn1	1.31928	1.17635	5.67057	1.14294e-05	0.00231248	3.45155	Rftn1	76438	ENSMUSG00000039316
ENSMUSG00000031328_Flna	1.86803	5.09959	5.82167	8.03941e-06	0.00203775	3.44541	Flna	192176	ENSMUSG00000031328
ENSMUSG00000001020_S100a4	2.74019	0.197694	5.69081	1.09016e-05	0.00227686	3.40405	S100a4	20198	ENSMUSG00000001020
ENSMUSG00000019876_Pkib	1.92285	0.381816	5.66387	1.16094e-05	0.00231278	3.38005	Pkib	18768	ENSMUSG00000019876
ENSMUSG00000040907_Atp1a3	3.08519	-1.1886	5.91082	6.54003e-06	0.00193983	3.36053	Atp1a3	232975	ENSMUSG00000040907
ENSMUSG00000000317_Bcl6b	1.55897	1.28859	5.62486	1.27186e-05	0.00237565	3.34855	Bcl6b	12029	ENSMUSG00000000317
ENSMUSG00000042622_Maff	1.29963	1.33572	5.62073	1.28423e-05	0.00237565	3.33993	Maff	17133	ENSMUSG00000042622
ENSMUSG00000002204_Napsa	2.08584	0.422912	5.62908	1.25938e-05	0.00237565	3.33915	Napsa	16541	ENSMUSG00000002204
ENSMUSG00000005103_Wdr1	0.844994	5.37017	5.78475	8.75916e-06	0.00210041	3.32636	Wdr1	22388	ENSMUSG00000005103
ENSMUSG00000079293_Clec7a	2.32679	3.41436	5.693	1.08459e-05	0.00227686	3.31081	Clec7a	56644	ENSMUSG00000079293
ENSMUSG00000056413_Adap1	1.97619	1.03833	5.57801	1.41946e-05	0.00239047	3.24647	Adap1	231821	ENSMUSG00000056413
ENSMUSG00000037405_Icam1	1.57085	4.25489	5.70903	1.0448e-05	0.00227686	3.23796	Icam1	15894	ENSMUSG00000037405
ENSMUSG00000042228_Lyn	0.948631	5.27204	5.73872	9.74947e-06	0.00225439	3.22344	Lyn	17096	ENSMUSG00000042228
ENSMUSG00000026832_Cytip	1.92647	0.598816	5.57282	1.43683e-05	0.00239047	3.22018	Cytip	227929	ENSMUSG00000026832
ENSMUSG00000027111_Itga6	1.4895	1.89465	5.57471	1.43046e-05	0.00239047	3.209	Itga6	16403	ENSMUSG00000027111
ENSMUSG00000038644_Pold1	1.18234	2.40071	5.59601	1.36079e-05	0.00239047	3.20734	Pold1	18971	ENSMUSG00000038644
ENSMUSG00000024640_Psat1	2.6883	0.665501	5.57583	1.42673e-05	0.00239047	3.18861	Psat1	107272	ENSMUSG00000024640
ENSMUSG00000049152_Ugt3a2	-0.526325	8.03145	-5.70935	1.04402e-05	0.00227686	3.17997	Ugt3a2	223337	ENSMUSG00000049152
ENSMUSG00000018930_Ccl4	3.6965	-1.6735	5.98713	5.48469e-06	0.00189719	3.17161	Ccl4	20303	ENSMUSG00000018930
ENSMUSG00000031004_Mki67	3.08518	2.28381	5.56572	1.46098e-05	0.00239472	3.15297	Mki67	17345	ENSMUSG00000031004
ENSMUSG00000037185_Krt80	2.10999	-0.729936	5.67967	1.11888e-05	0.00229974	3.15251	Krt80	74127	ENSMUSG00000037185
ENSMUSG00000037820_Tgm2	1.07274	7.30233	5.70392	1.05732e-05	0.00227686	3.14313	Tgm2	21817	ENSMUSG00000037820
ENSMUSG00000022360_Atad2	1.7136	2.26304	5.54796	1.52317e-05	0.00244145	3.11659	Atad2	70472	ENSMUSG00000022360
ENSMUSG00000027435_Cd93	1.78179	2.77248	5.5719	1.43993e-05	0.00239047	3.10813	Cd93	17064	ENSMUSG00000027435
ENSMUSG00000025058_Tasl	2.19186	-1.06387	5.76394	9.19339e-06	0.00216446	3.10664	Tasl	71398	ENSMUSG00000025058
ENSMUSG00000051735_Rinl	1.59386	1.46565	5.51434	1.64841e-05	0.00249218	3.09487	Rinl	320435	ENSMUSG00000051735
ENSMUSG00000032691_Nlrp3	2.6019	0.409621	5.52696	1.60019e-05	0.00249218	3.08645	Nlrp3	216799	ENSMUSG00000032691
ENSMUSG00000037946_Fgd3	1.73564	1.09318	5.49566	1.72243e-05	0.00249935	3.065	Fgd3	30938	ENSMUSG00000037946
ENSMUSG00000031827_Cotl1	1.84319	5.01864	5.65551	1.18387e-05	0.00232272	3.06189	Cotl1	72042	ENSMUSG00000031827
ENSMUSG00000024851_Pitpnm1	1.17252	2.62086	5.54683	1.5272e-05	0.00244145	3.05634	Pitpnm1	18739	ENSMUSG00000024851
ENSMUSG00000024277_Mapre2	0.835241	3.96361	5.62133	1.28241e-05	0.00237565	3.05587	Mapre2	212307	ENSMUSG00000024277
ENSMUSG00000004952_Rasa4	2.06615	1.54534	5.48594	1.7623e-05	0.00249935	3.02812	Rasa4	54153	ENSMUSG00000004952
ENSMUSG00000028917_Plekhm2	0.712003	3.70085	5.59157	1.37502e-05	0.00239047	3.013	Plekhm2	69582	ENSMUSG00000028917
ENSMUSG00000025648_Pfkfb4	1.90662	0.558915	5.47438	1.81096e-05	0.00249935	2.98524	Pfkfb4	270198	ENSMUSG00000025648
ENSMUSG00000021451_Sema4d	2.33297	1.29826	5.45798	1.8823e-05	0.00249935	2.97918	Sema4d	20354	ENSMUSG00000021451
ENSMUSG00000019773_Fbxo5	1.425	0.0192518	5.48504	1.76605e-05	0.00249935	2.96344	Fbxo5	67141	ENSMUSG00000019773
ENSMUSG00000024521_Pmaip1	1.93738	0.465296	5.4559	1.89154e-05	0.00249935	2.96078	Pmaip1	58801	ENSMUSG00000024521
ENSMUSG00000026728_Vim	1.77011	5.0473	5.60921	1.31934e-05	0.00239047	2.95948	Vim	22352	ENSMUSG00000026728
ENSMUSG00000019823_Mical1	1.93766	0.826145	5.44754	1.92919e-05	0.00252334	2.95507	Mical1	171580	ENSMUSG00000019823
ENSMUSG00000004891_Nes	2.37217	2.19272	5.46391	1.85617e-05	0.00249935	2.95206	Nes	18008	ENSMUSG00000004891
ENSMUSG00000052384_Nrros	1.65753	2.88937	5.5126	1.65516e-05	0.00249218	2.95162	Nrros	224109	ENSMUSG00000052384
ENSMUSG00000048612_Myof	2.18602	1.8605	5.43654	1.97991e-05	0.0025384	2.89713	Myof	226101	ENSMUSG00000048612
ENSMUSG00000041238_Rbbp8	0.764619	2.47967	5.46803	1.83824e-05	0.00249935	2.8907	Rbbp8	225182	ENSMUSG00000041238
ENSMUSG00000026483_Niban1	1.84117	3.19404	5.48676	1.75892e-05	0.00249935	2.84652	Niban1	63913	ENSMUSG00000026483
ENSMUSG00000023908_Pkmyt1	1.90271	1.05583	5.38917	2.21419e-05	0.00269867	2.82965	Pkmyt1	268930	ENSMUSG00000023908
ENSMUSG00000027995_Tlr2	1.86211	2.40491	5.41262	2.09486e-05	0.00263921	2.77582	Tlr2	24088	ENSMUSG00000027995
ENSMUSG00000026547_Tagln2	1.47604	4.52879	5.51948	1.62861e-05	0.00249218	2.77507	Tagln2	21346	ENSMUSG00000026547
ENSMUSG00000032294_Pkm	2.0935	5.29763	5.53591	1.56688e-05	0.00247433	2.77178	Pkm	18746	ENSMUSG00000032294
ENSMUSG00000030707_Coro1a	2.09448	3.79386	5.48137	1.78137e-05	0.00249935	2.76818	Coro1a	12721	ENSMUSG00000030707
ENSMUSG00000042249_Grk3	1.51151	1.98068	5.37856	2.27045e-05	0.00269867	2.75441	Grk3	320129	ENSMUSG00000042249
ENSMUSG00000026480_Ncf2	2.1642	2.69039	5.41024	2.10668e-05	0.00263921	2.74253	Ncf2	17970	ENSMUSG00000026480
ENSMUSG00000042349_Ikbke	1.07242	4.60955	5.49646	1.7192e-05	0.00249935	2.70041	Ikbke	56489	ENSMUSG00000042349
ENSMUSG00000054342_Kcnn4	1.93378	-0.771421	5.46843	1.83652e-05	0.00249935	2.69279	Kcnn4	16534	ENSMUSG00000054342
ENSMUSG00000001918_Slc1a5	1.52215	1.34151	5.32629	2.56938e-05	0.00288805	2.68196	Slc1a5	20514	ENSMUSG00000001918
ENSMUSG00000089929_Bcl2a1b	2.28409	1.17526	5.30907	2.67639e-05	0.00288805	2.64303	Bcl2a1b	12045	ENSMUSG00000089929
ENSMUSG00000034595_Ppp1r18	1.65732	3.02277	5.37745	2.27643e-05	0.00269867	2.61986	Ppp1r18	76448	ENSMUSG00000034595
ENSMUSG00000039942_Ptger4	1.89326	-0.331742	5.34663	2.44859e-05	0.00284677	2.59698	Ptger4	19219	ENSMUSG00000039942
ENSMUSG00000041515_Irf8	1.61676	3.57649	5.39987	2.15891e-05	0.00266245	2.59178	Irf8	15900	ENSMUSG00000041515
ENSMUSG00000030047_Arhgap25	2.17018	1.77875	5.29897	2.74126e-05	0.00290955	2.58449	Arhgap25	232201	ENSMUSG00000030047
ENSMUSG00000005470_Asf1b	2.6831	0.435659	5.28867	2.80907e-05	0.00293061	2.57882	Asf1b	66929	ENSMUSG00000005470
ENSMUSG00000037868_Egr2	5.74964	-1.93279	6.06508	4.5853e-06	0.00174632	2.57103	Egr2	13654	ENSMUSG00000037868
ENSMUSG00000049625_Tifab	2.21766	2.52321	5.31243	2.65518e-05	0.00288805	2.53866	Tifab	212937	ENSMUSG00000049625
ENSMUSG00000025007_Aldh18a1	1.93414	1.85375	5.27086	2.93033e-05	0.00294146	2.5286	Aldh18a1	56454	ENSMUSG00000025007
ENSMUSG00000024590_Lmnb1	1.76125	2.55419	5.3021	2.72097e-05	0.00290955	2.52494	Lmnb1	16906	ENSMUSG00000024590
ENSMUSG00000025132_Arhgdia	0.860791	6.67177	5.44263	1.95166e-05	0.00252721	2.51239	Arhgdia	192662	ENSMUSG00000025132
ENSMUSG00000006360_Crip1	1.5754	2.96066	5.30944	2.67409e-05	0.00288805	2.46631	Crip1	12925	ENSMUSG00000006360
ENSMUSG00000032076_Cadm1	0.631939	4.85734	5.40764	2.11969e-05	0.00263921	2.46459	Cadm1	54725	ENSMUSG00000032076
ENSMUSG00000022186_Oxct1	1.70206	2.87367	5.28569	2.82899e-05	0.00293061	2.42652	Oxct1	67041	ENSMUSG00000022186
ENSMUSG00000098112_Bin2	1.94447	2.43645	5.26251	2.98895e-05	0.00295187	2.42185	Bin2	668218	ENSMUSG00000098112
ENSMUSG00000029254_Stap1	1.66551	0.402039	5.21473	3.3483e-05	0.00323561	2.42071	Stap1	56792	ENSMUSG00000029254
ENSMUSG00000027368_Dusp2	2.97986	-0.458416	5.27928	2.87234e-05	0.00294146	2.39206	Dusp2	13537	ENSMUSG00000027368
ENSMUSG00000024858_Grk2	0.82173	5.13883	5.38211	2.25148e-05	0.00269867	2.3892	Grk2	110355	ENSMUSG00000024858
ENSMUSG00000028859_Csf3r	1.57462	1.24109	5.19638	3.4977e-05	0.00328201	2.38832	Csf3r	12986	ENSMUSG00000028859
ENSMUSG00000042489_Clspn	3.40609	-1.27103	5.37447	2.29249e-05	0.00269867	2.38687	Clspn	269582	ENSMUSG00000042489
ENSMUSG00000098557_Kctd12	1.91735	4.37325	5.34428	2.46227e-05	0.00284677	2.37655	Kctd12	239217	ENSMUSG00000098557
ENSMUSG00000025203_Scd2	2.08992	3.86174	5.31116	2.66315e-05	0.00288805	2.37486	Scd2	20250	ENSMUSG00000025203
ENSMUSG00000009687_Fxyd5	1.74597	2.81672	5.2578	3.02257e-05	0.00295187	2.3633	Fxyd5	18301	ENSMUSG00000009687
ENSMUSG00000031264_Btk	1.85978	1.12328	5.17996	3.63714e-05	0.00329902	2.35938	Btk	12229	ENSMUSG00000031264
ENSMUSG00000038976_Ppp1r9b	1.18679	3.98622	5.31923	2.61273e-05	0.00288805	2.34596	Ppp1r9b	217124	ENSMUSG00000038976
ENSMUSG00000001228_Uhrf1	3.72214	0.65092	5.16884	3.73466e-05	0.00329902	2.33984	Uhrf1	18140	ENSMUSG00000001228
ENSMUSG00000029580_Actb	0.992592	9.26355	5.33257	2.53144e-05	0.00287541	2.33953	Actb	11461	ENSMUSG00000029580
ENSMUSG00000050022_Amz1	1.64474	0.821581	5.16609	3.75921e-05	0.00329902	2.33296	Amz1	231842	ENSMUSG00000050022
ENSMUSG00000041836_Ptpre	1.77246	0.975952	5.16382	3.77963e-05	0.00329902	2.32836	Ptpre	19267	ENSMUSG00000041836
ENSMUSG00000056917_Sipa1	0.795789	3.56418	5.2892	2.80551e-05	0.00293061	2.32281	Sipa1	20469	ENSMUSG00000056917
ENSMUSG00000042404_Dennd4b	1.46871	2.19934	5.20108	3.45884e-05	0.00326923	2.31993	Dennd4b	229541	ENSMUSG00000042404
ENSMUSG00000021886_Gpr65	1.76303	1.58011	5.16745	3.74712e-05	0.00329902	2.28997	Gpr65	14744	ENSMUSG00000021886
ENSMUSG00000049103_Ccr2	2.47927	1.64313	5.16378	3.77999e-05	0.00329902	2.28759	Ccr2	12772	ENSMUSG00000049103
ENSMUSG00000021822_Plau	2.50565	1.08374	5.14058	3.99488e-05	0.00338103	2.27611	Plau	18792	ENSMUSG00000021822
ENSMUSG00000072235_Tuba1a	1.06929	3.67658	5.2565	3.03189e-05	0.00295187	2.25332	Tuba1a	22142	ENSMUSG00000072235
ENSMUSG00000049130_C5ar1	2.52859	0.282243	5.14864	3.91882e-05	0.00333847	2.25042	C5ar1	12273	ENSMUSG00000049130
ENSMUSG00000041859_Mcm3	1.91842	3.05135	5.20795	3.40274e-05	0.00323986	2.2451	Mcm3	17215	ENSMUSG00000041859
ENSMUSG00000025964_Adam23	-1.25179	2.87188	-5.21142	3.37478e-05	0.00323704	2.24138	Adam23	23792	ENSMUSG00000025964
ENSMUSG00000026271_Gpr35	2.60969	0.421965	5.12495	4.14649e-05	0.00344465	2.23671	Gpr35	64095	ENSMUSG00000026271
ENSMUSG00000023169_Slc38a1	1.88953	1.07007	5.11114	4.28544e-05	0.00346994	2.2032	Slc38a1	105727	ENSMUSG00000023169
ENSMUSG00000035004_Igsf6	1.97803	2.40914	5.15919	3.82155e-05	0.00329902	2.19976	Igsf6	80719	ENSMUSG00000035004
ENSMUSG00000043832_Clec4a3	1.69831	2.37979	5.16491	3.76979e-05	0.00329902	2.19973	Clec4a3	73149	ENSMUSG00000043832
ENSMUSG00000031662_Snx20	1.93975	1.19473	5.10832	4.31432e-05	0.00346994	2.19417	Snx20	71607	ENSMUSG00000031662
ENSMUSG00000007041_Clic1	1.25332	4.84874	5.26442	2.97546e-05	0.00295187	2.13783	Clic1	114584	ENSMUSG00000007041
ENSMUSG00000040659_Efhd2	0.930262	5.21265	5.27399	2.90859e-05	0.00294146	2.13175	Efhd2	27984	ENSMUSG00000040659
ENSMUSG00000118012_Gm46620	-1.23926	3.23064	-5.18619	3.58356e-05	0.00329902	2.11813	NA	NA	ENSMUSG00000118012
ENSMUSG00000059326_Csf2ra	1.79124	2.35774	5.12461	4.14985e-05	0.00344465	2.11793	Csf2ra	12982	ENSMUSG00000059326
ENSMUSG00000056888_Glipr1	2.19364	0.484839	5.06867	4.74276e-05	0.00357741	2.11661	Glipr1	73690	ENSMUSG00000056888
ENSMUSG00000028333_Anp32b	0.557289	5.89428	5.2773	2.88584e-05	0.00294146	2.11593	Anp32b	67628	ENSMUSG00000028333
ENSMUSG00000030878_Cdr2	2.14104	-0.176791	5.11505	4.24564e-05	0.00346994	2.11267	Cdr2	12585	ENSMUSG00000030878
ENSMUSG00000031608_Galnt7	1.12009	1.35619	5.07517	4.66967e-05	0.00357741	2.10505	Galnt7	108150	ENSMUSG00000031608
ENSMUSG00000112148_Lilrb4a	2.58294	1.81883	5.06716	4.7599e-05	0.00357741	2.07109	Lilrb4a	14728	ENSMUSG00000112148
ENSMUSG00000027009_Itga4	1.86369	2.24892	5.09661	4.43663e-05	0.00352066	2.06948	Itga4	16401	ENSMUSG00000027009
ENSMUSG00000020914_Top2a	3.02424	2.20313	5.08277	4.58564e-05	0.00355565	2.06183	Top2a	21973	ENSMUSG00000020914
ENSMUSG00000073490_Ifi207	1.36513	2.40532	5.09196	4.48613e-05	0.00352066	2.03707	Ifi207	226691	ENSMUSG00000073490
ENSMUSG00000017670_Elmo2	0.842399	3.49315	5.16094	3.80564e-05	0.00329902	2.02672	Elmo2	140579	ENSMUSG00000017670
ENSMUSG00000050721_Plekho2	1.72828	3.24725	5.12601	4.13606e-05	0.00344465	1.99077	Plekho2	102595	ENSMUSG00000050721
ENSMUSG00000022831_Hcls1	1.86268	3.84	5.15501	3.85976e-05	0.00330994	1.98858	Hcls1	15163	ENSMUSG00000022831
ENSMUSG00000017631_Abr	1.71572	2.61851	5.08408	4.57136e-05	0.00355565	1.9874	Abr	109934	ENSMUSG00000017631
ENSMUSG00000024989_Cep55	3.37935	-1.1572	5.11124	4.2844e-05	0.00346994	1.96774	Cep55	74107	ENSMUSG00000024989
ENSMUSG00000046223_Plaur	3.51595	-0.317644	5.06303	4.80709e-05	0.00357741	1.95581	Plaur	18793	ENSMUSG00000046223
ENSMUSG00000053846_Lipg	-1.06112	2.06327	-5.03666	5.11982e-05	0.00372453	1.94979	Lipg	16891	ENSMUSG00000053846
ENSMUSG00000024736_Tmem132a	1.65095	2.18416	5.04396	5.0312e-05	0.00368073	1.94869	Tmem132a	98170	ENSMUSG00000024736
ENSMUSG00000025534_Gusb	0.559648	4.83657	5.18075	3.63031e-05	0.00329902	1.92878	Gusb	110006	ENSMUSG00000025534
ENSMUSG00000024672_Ms4a7	1.21856	0.583254	4.97901	5.87729e-05	0.00410181	1.91854	Ms4a7	109225	ENSMUSG00000024672
ENSMUSG00000039936_Pik3cd	2.03591	2.85566	5.06315	4.80574e-05	0.00357741	1.90456	Pik3cd	18707	ENSMUSG00000039936
ENSMUSG00000040204_Pclaf	3.63339	0.65625	4.96547	6.07107e-05	0.0041785	1.88372	Pclaf	68026	ENSMUSG00000040204
ENSMUSG00000050578_Mmp13	3.24596	-1.3059	5.1829	3.61176e-05	0.00329902	1.88251	Mmp13	17386	ENSMUSG00000050578
ENSMUSG00000022378_Cyrib	1.25999	3.49701	5.09306	4.47435e-05	0.00352066	1.88048	Cyrib	223601	ENSMUSG00000022378
ENSMUSG00000078771_Evi2a	2.05297	1.52788	4.97408	5.9471e-05	0.00411813	1.86955	Evi2a	14017	ENSMUSG00000078771
ENSMUSG00000102037_Bcl2a1a	2.81323	-0.717163	4.97797	5.89186e-05	0.00410181	1.8557	Bcl2a1a	12044	ENSMUSG00000102037
ENSMUSG00000097715_Gpr137b-ps	1.68979	1.26171	4.94845	6.32369e-05	0.0041785	1.84025	NA	NA	ENSMUSG00000097715
ENSMUSG00000054640_Slc8a1	1.80074	1.40131	4.95478	6.22852e-05	0.0041785	1.8262	Slc8a1	20541	ENSMUSG00000054640
ENSMUSG00000045502_Hcar2	2.13823	-0.381257	4.95803	6.18026e-05	0.0041785	1.82145	Hcar2	80885	ENSMUSG00000045502
ENSMUSG00000020143_Dock2	1.74253	2.60477	5.01575	5.38243e-05	0.00385067	1.81681	Dock2	94176	ENSMUSG00000020143
ENSMUSG00000050335_Lgals3	2.03104	3.7265	5.06726	4.75868e-05	0.00357741	1.79834	Lgals3	16854	ENSMUSG00000050335
ENSMUSG00000000982_Ccl3	3.63889	-2.26888	5.33988	2.48804e-05	0.00285112	1.77833	Ccl3	20302	ENSMUSG00000000982
ENSMUSG00000029919_Hpgds	1.66417	0.00497601	4.92106	6.75303e-05	0.00418397	1.76735	Hpgds	54486	ENSMUSG00000029919
ENSMUSG00000009585_Apobec3	2.20169	1.76795	4.92953	6.61715e-05	0.00417969	1.75137	Apobec3	80287	ENSMUSG00000009585
ENSMUSG00000029064_Gnb1	0.503945	6.11721	5.11088	4.28808e-05	0.00346994	1.71836	Gnb1	14688	ENSMUSG00000029064
ENSMUSG00000079523_Tmsb10	1.25961	4.36471	5.06602	4.77289e-05	0.00357741	1.71576	Tmsb10	19240	ENSMUSG00000079523
ENSMUSG00000024401_Tnf	3.03838	-1.42341	5.09804	4.42147e-05	0.00352066	1.71382	Tnf	21926	ENSMUSG00000024401
ENSMUSG00000056394_Lig1	1.73792	2.24359	4.9379	6.48576e-05	0.00417969	1.69996	Lig1	16881	ENSMUSG00000056394
ENSMUSG00000033730_Egr3	5.47611	-3.15942	5.86344	7.2975e-06	0.00203775	1.69858	Egr3	13655	ENSMUSG00000033730
ENSMUSG00000036768_Kif15	3.63608	-0.949157	5.00481	5.52514e-05	0.00390956	1.69749	Kif15	209737	ENSMUSG00000036768
ENSMUSG00000029299_Abcg3	1.61701	2.44025	4.94958	6.30672e-05	0.0041785	1.69412	Abcg3	27405	ENSMUSG00000029299
ENSMUSG00000021948_Prkcd	1.18353	3.6083	5.02039	5.32302e-05	0.00382932	1.68925	Prkcd	18753	ENSMUSG00000021948
ENSMUSG00000043740_B430306N03Rik	2.09692	2.07217	4.91813	6.8007e-05	0.00419344	1.68542	B430306N03Rik	320148	ENSMUSG00000043740
ENSMUSG00000020437_Myo1g	2.08222	1.65949	4.89615	7.16889e-05	0.00430639	1.67072	Myo1g	246177	ENSMUSG00000020437
ENSMUSG00000062373_Tmem65	0.890679	2.66858	4.95225	6.26636e-05	0.0041785	1.66931	Tmem65	74868	ENSMUSG00000062373
ENSMUSG00000030774_Pak1	1.45588	2.1975	4.92112	6.75198e-05	0.00418397	1.66816	Pak1	18479	ENSMUSG00000030774
ENSMUSG00000024056_Ndc80	2.65214	-0.567837	4.90122	7.08231e-05	0.00429094	1.66621	Ndc80	67052	ENSMUSG00000024056
ENSMUSG00000030536_Iqgap1	1.53707	4.14273	5.03369	5.15634e-05	0.00373014	1.66174	Iqgap1	29875	ENSMUSG00000030536
ENSMUSG00000035208_Slfn8	1.27842	1.31433	4.87186	7.59939e-05	0.00447293	1.64736	Slfn8	276950	ENSMUSG00000035208
ENSMUSG00000023349_Clec4n	1.76629	2.63343	4.93752	6.49159e-05	0.00417969	1.64211	Clec4n	56620	ENSMUSG00000023349
ENSMUSG00000070462_Tlnrd1	1.05917	3.12249	4.95795	6.18136e-05	0.0041785	1.61221	Tlnrd1	80889	ENSMUSG00000070462
ENSMUSG00000006273_Atp6v1b2	0.679949	5.49555	5.05419	4.90969e-05	0.0036295	1.59348	Atp6v1b2	11966	ENSMUSG00000006273
ENSMUSG00000022439_Parvg	2.18097	1.60127	4.85972	7.82442e-05	0.00452997	1.5859	Parvg	64099	ENSMUSG00000022439
ENSMUSG00000036943_Rab8b	1.35775	2.81489	4.92811	6.63978e-05	0.00417969	1.58553	Rab8b	235442	ENSMUSG00000036943
ENSMUSG00000038252_Ncapd2	1.63297	2.30355	4.89531	7.18341e-05	0.00430639	1.58533	Ncapd2	68298	ENSMUSG00000038252
ENSMUSG00000025232_Hexa	0.736887	6.02525	5.0522	4.93314e-05	0.0036295	1.58019	Hexa	15211	ENSMUSG00000025232
ENSMUSG00000004665_Cnn2	1.23342	3.30327	4.94839	6.32471e-05	0.0041785	1.56697	Cnn2	12798	ENSMUSG00000004665
ENSMUSG00000035356_Nfkbiz	1.91247	2.20023	4.87222	7.59298e-05	0.00447293	1.56142	Nfkbiz	80859	ENSMUSG00000035356
ENSMUSG00000026094_Stk17b	1.25967	3.2439	4.94279	6.41017e-05	0.00417969	1.55766	Stk17b	98267	ENSMUSG00000026094
ENSMUSG00000000489_Pdgfb	2.11044	1.16304	4.82303	8.5455e-05	0.00468134	1.55195	Pdgfb	18591	ENSMUSG00000000489
ENSMUSG00000034652_Cd300a	1.58887	3.1109	4.9292	6.62254e-05	0.00417969	1.54761	Cd300a	217303	ENSMUSG00000034652
ENSMUSG00000038587_Akap12	1.79447	1.71111	4.83494	8.30448e-05	0.00457917	1.53191	Akap12	83397	ENSMUSG00000038587
ENSMUSG00000049775_Tmsb4x	1.742	7.9893	5.0104	5.45182e-05	0.00387888	1.52784	Tmsb4x	19241	ENSMUSG00000049775
ENSMUSG00000087107_AI662270	2.01692	2.05378	4.84628	8.08111e-05	0.00452997	1.52743	AI662270	100043636	ENSMUSG00000087107
ENSMUSG00000021728_Emb	1.99254	-0.0133263	4.81131	8.78986e-05	0.00478235	1.52433	Emb	13723	ENSMUSG00000021728
ENSMUSG00000028041_Adam15	1.552	2.13973	4.84289	8.14731e-05	0.00454739	1.50143	Adam15	11490	ENSMUSG00000028041
ENSMUSG00000024675_Ms4a4c	2.60515	0.66647	4.79089	9.23236e-05	0.00491975	1.50133	Ms4a4c	64380	ENSMUSG00000024675
ENSMUSG00000027843_Ptpn22	1.93611	0.377766	4.78613	9.33863e-05	0.00493575	1.4909	Ptpn22	19260	ENSMUSG00000027843
ENSMUSG00000032093_Cd3e	2.50873	-0.906012	4.90468	7.02376e-05	0.00429013	1.49016	Cd3e	12501	ENSMUSG00000032093
ENSMUSG00000035042_Ccl5	1.61993	1.89579	4.83464	8.31032e-05	0.00457917	1.47865	Ccl5	20304	ENSMUSG00000035042
ENSMUSG00000031165_Was	1.82592	1.49948	4.79423	9.15844e-05	0.00491975	1.45496	Was	22376	ENSMUSG00000031165
ENSMUSG00000039959_Hip1	1.48701	3.07714	4.88328	7.3939e-05	0.00439191	1.44952	Hip1	215114	ENSMUSG00000039959
ENSMUSG00000034855_Cxcl10	2.25533	2.9744	4.86925	7.64734e-05	0.00448079	1.44329	Cxcl10	15945	ENSMUSG00000034855
ENSMUSG00000026341_Actr3	0.902879	6.58548	4.99009	5.7233e-05	0.00402778	1.43574	Actr3	74117	ENSMUSG00000026341
ENSMUSG00000068245_Phf11d	1.34852	1.54738	4.77946	9.48983e-05	0.00494962	1.42255	Phf11d	219132	ENSMUSG00000068245
ENSMUSG00000011884_Gltp	1.4762	2.83817	4.85678	7.87975e-05	0.00452997	1.42075	Gltp	56356	ENSMUSG00000011884
ENSMUSG00000015745_Plekho1	1.2354	2.88163	4.85035	8.00251e-05	0.00452997	1.39335	Plekho1	67220	ENSMUSG00000015745
ENSMUSG00000028657_Ppt1	0.779938	4.84592	4.95392	6.24133e-05	0.0041785	1.39014	Ppt1	19063	ENSMUSG00000028657
ENSMUSG00000024691_Fam111a	1.92403	1.98627	4.78224	9.42657e-05	0.00494962	1.37709	Fam111a	107373	ENSMUSG00000024691
ENSMUSG00000002111_Spi1	1.79542	3.94929	4.90068	7.09137e-05	0.00429094	1.3706	Spi1	20375	ENSMUSG00000002111
ENSMUSG00000028843_Sh3bgrl3	1.69085	3.72941	4.8848	7.36706e-05	0.00439191	1.3634	Sh3bgrl3	73723	ENSMUSG00000028843
ENSMUSG00000015340_Cybb	1.66405	4.65595	4.92687	6.65958e-05	0.00417969	1.36203	Cybb	13058	ENSMUSG00000015340
ENSMUSG00000043391_2510009E07Rik	0.890848	3.18221	4.84981	8.01278e-05	0.00452997	1.34597	2510009E07Rik	72190	ENSMUSG00000043391
ENSMUSG00000021175_Cdca7l	1.98697	-0.47138	4.74521	0.000103055	0.00521271	1.34491	Cdca7l	217946	ENSMUSG00000021175
ENSMUSG00000025161_Slc16a3	2.58896	-0.0521615	4.7316	0.000106487	0.00524546	1.34089	Slc16a3	80879	ENSMUSG00000025161
ENSMUSG00000002602_Axl	1.37438	5.18825	4.93543	6.52421e-05	0.00417969	1.33747	Axl	26362	ENSMUSG00000002602
ENSMUSG00000020272_Stk10	1.64155	2.39932	4.79139	9.22137e-05	0.00491975	1.32538	Stk10	20868	ENSMUSG00000020272
ENSMUSG00000005413_Hmox1	1.66742	5.38696	4.9255	6.68156e-05	0.00417969	1.32416	Hmox1	15368	ENSMUSG00000005413
ENSMUSG00000004038_Gstm3	1.51626	7.05248	4.92821	6.63827e-05	0.00417969	1.30493	Gstm3	14864	ENSMUSG00000004038
ENSMUSG00000028037_Ifi44	0.98045	2.37114	4.78065	9.46272e-05	0.00494962	1.30363	Ifi44	99899	ENSMUSG00000028037
ENSMUSG00000093938_Evi2b	2.02166	1.48359	4.7274	0.000107571	0.00524546	1.30175	Evi2b	216984	ENSMUSG00000093938
ENSMUSG00000024670_Cd6	2.81222	-1.71036	4.94222	6.41893e-05	0.00417969	1.28475	Cd6	12511	ENSMUSG00000024670
ENSMUSG00000026875_Traf1	1.79771	-0.515117	4.73189	0.000106413	0.00524546	1.27376	Traf1	22029	ENSMUSG00000026875
ENSMUSG00000105263_Gm42427	-1.17664	3.52845	-4.84686	8.06984e-05	0.00452997	1.26355	NA	NA	ENSMUSG00000105263
ENSMUSG00000020340_Cyfip2	1.39162	1.08814	4.68603	0.000118847	0.00543797	1.24145	Cyfip2	76884	ENSMUSG00000020340
ENSMUSG00000027423_Snx5	0.600881	5.61976	4.90752	6.97594e-05	0.00428111	1.23998	Snx5	69178	ENSMUSG00000027423
ENSMUSG00000048163_Selplg	1.55134	2.53718	4.76553	9.81334e-05	0.00504399	1.23891	Selplg	20345	ENSMUSG00000048163
ENSMUSG00000070003_Ssbp4	1.53913	2.60099	4.7622	9.89231e-05	0.00504399	1.23747	Ssbp4	76900	ENSMUSG00000070003
ENSMUSG00000028874_Fgr	2.14236	2.26752	4.73947	0.000104488	0.00524423	1.23444	Fgr	14191	ENSMUSG00000028874
ENSMUSG00000004707_Ly9	1.81824	2.08269	4.72513	0.00010816	0.00524546	1.20987	Ly9	17085	ENSMUSG00000004707
ENSMUSG00000023947_Nfkbie	0.950541	1.96763	4.71451	0.000110962	0.0052632	1.20277	Nfkbie	18037	ENSMUSG00000023947
ENSMUSG00000021624_Cd180	2.35184	2.16005	4.71688	0.000110333	0.0052632	1.19206	Cd180	17079	ENSMUSG00000021624
ENSMUSG00000006678_Pola1	1.23416	1.74849	4.68217	0.00011996	0.00546957	1.17232	Pola1	18968	ENSMUSG00000006678
ENSMUSG00000026737_Pip4k2a	1.35241	2.90315	4.74701	0.000102609	0.00521053	1.15446	Pip4k2a	18718	ENSMUSG00000026737
ENSMUSG00000024937_Ehbp1l1	1.28797	3.74485	4.80313	8.96438e-05	0.00485689	1.15411	Ehbp1l1	114601	ENSMUSG00000024937
ENSMUSG00000038034_Igsf8	0.821925	3.72373	4.801	9.01046e-05	0.00486152	1.15049	Igsf8	140559	ENSMUSG00000038034
ENSMUSG00000026360_Rgs2	1.54222	2.85818	4.73988	0.000104384	0.00524423	1.13873	Rgs2	19735	ENSMUSG00000026360
ENSMUSG00000028059_Arhgef2	1.64709	2.30035	4.70245	0.000114235	0.00537355	1.13646	Arhgef2	16800	ENSMUSG00000028059
ENSMUSG00000020042_Btbd11	2.434	0.586236	4.62546	0.000137544	0.00595515	1.13087	Btbd11	74007	ENSMUSG00000020042
ENSMUSG00000022615_Tymp	-0.669458	5.05143	-4.85337	7.94452e-05	0.00452997	1.12795	Tymp	72962	ENSMUSG00000022615
ENSMUSG00000032412_Atp1b3	0.879822	5.25753	4.85196	7.97152e-05	0.00452997	1.1217	Atp1b3	11933	ENSMUSG00000032412
ENSMUSG00000017781_Pitpna	0.579044	5.88206	4.86008	7.81763e-05	0.00452997	1.11984	Pitpna	18738	ENSMUSG00000017781
ENSMUSG00000047045_Tmem164	0.805726	3.29366	4.76346	9.86237e-05	0.00504399	1.11958	Tmem164	209497	ENSMUSG00000047045
ENSMUSG00000054364_Rhob	0.587423	5.34829	4.85081	7.99373e-05	0.00452997	1.11488	Rhob	11852	ENSMUSG00000054364
ENSMUSG00000022876_Samsn1	2.16012	0.00810687	4.61957	0.000139511	0.00595515	1.11243	Samsn1	67742	ENSMUSG00000022876
ENSMUSG00000028931_Kcnab2	1.8185	0.512578	4.61193	0.000142107	0.00595515	1.10361	Kcnab2	16498	ENSMUSG00000028931
ENSMUSG00000051457_Spn	2.23708	1.08677	4.6221	0.000138663	0.00595515	1.09279	Spn	20737	ENSMUSG00000051457
ENSMUSG00000041642_Kif21b	1.94038	1.63099	4.64306	0.000131823	0.00586589	1.09241	Kif21b	16565	ENSMUSG00000041642
ENSMUSG00000026121_Sema4c	1.21013	1.92622	4.65813	0.000127118	0.00571543	1.08951	Sema4c	20353	ENSMUSG00000026121
ENSMUSG00000026421_Csrp1	1.4139	4.15072	4.78698	9.31964e-05	0.00493575	1.07728	Csrp1	13007	ENSMUSG00000026421
ENSMUSG00000027540_Ptpn1	1.15661	4.94874	4.82194	8.56805e-05	0.00468134	1.0742	Ptpn1	19246	ENSMUSG00000027540
ENSMUSG00000021457_Syk	1.58101	3.20564	4.73128	0.000106571	0.00524546	1.0552	Syk	20963	ENSMUSG00000021457
ENSMUSG00000029468_P2rx7	1.52359	1.5674	4.62411	0.000137992	0.00595515	1.05311	P2rx7	18439	ENSMUSG00000029468
ENSMUSG00000032135_Mcam	1.2524	2.49147	4.67563	0.000121865	0.00549838	1.05163	Mcam	84004	ENSMUSG00000032135
ENSMUSG00000021569_Trip13	1.43843	0.343121	4.58605	0.000151268	0.00615606	1.04803	Trip13	69716	ENSMUSG00000021569
ENSMUSG00000001034_Mapk7	1.22741	1.42159	4.60522	0.000144429	0.00599427	1.03451	Mapk7	23939	ENSMUSG00000001034
ENSMUSG00000025915_Sgk3	0.690344	3.2948	4.72359	0.000108563	0.00524546	1.02929	Sgk3	170755	ENSMUSG00000025915
ENSMUSG00000026956_Uap1l1	1.07198	2.86374	4.68892	0.000118022	0.00543797	1.02154	Uap1l1	227620	ENSMUSG00000026956
ENSMUSG00000028159_Dapp1	1.65363	0.561024	4.57218	0.00015642	0.00619416	1.01439	Dapp1	26377	ENSMUSG00000028159
ENSMUSG00000040084_Bub1b	2.32705	0.903597	4.58095	0.000153144	0.006158	1.01381	Bub1b	12236	ENSMUSG00000040084
ENSMUSG00000033220_Rac2	2.04814	4.32362	4.76213	9.894e-05	0.00504399	1.00829	Rac2	19354	ENSMUSG00000033220
ENSMUSG00000048368_Omd	-1.04515	0.658968	-4.57587	0.000155032	0.006158	1.00718	Omd	27047	ENSMUSG00000048368
ENSMUSG00000036223_Ska1	2.62181	-2.12277	4.71535	0.00011074	0.0052632	0.983007	Ska1	66468	ENSMUSG00000036223
ENSMUSG00000003363_Pld3	0.599666	4.63219	4.7756	9.57833e-05	0.00496119	0.981709	Pld3	18807	ENSMUSG00000003363
ENSMUSG00000002458_Rgs19	1.84342	1.51094	4.58678	0.000151003	0.00615606	0.980183	Rgs19	56470	ENSMUSG00000002458
ENSMUSG00000026288_Inpp5d	1.63026	2.92468	4.67803	0.000121162	0.0054895	0.980134	Inpp5d	16331	ENSMUSG00000026288
ENSMUSG00000028459_Cd72	1.15071	3.14016	4.69256	0.000116993	0.00541051	0.979746	Cd72	12517	ENSMUSG00000028459
ENSMUSG00000001082_Mfsd10	1.07974	1.78432	4.60132	0.000145795	0.00603163	0.977532	Mfsd10	68294	ENSMUSG00000001082
ENSMUSG00000020897_Aurkb	2.77027	0.55875	4.55311	0.000163795	0.00632978	0.968109	Aurkb	20877	ENSMUSG00000020897
ENSMUSG00000051506_Wdfy4	1.58	2.3849	4.63665	0.000133878	0.00590982	0.956383	Wdfy4	545030	ENSMUSG00000051506
ENSMUSG00000052688_Rab7b	2.16289	0.716095	4.54898	0.000165437	0.00632978	0.956068	Rab7b	226421	ENSMUSG00000052688
ENSMUSG00000030223_Ptpro	1.9885	-0.308726	4.55561	0.000162809	0.00632978	0.945578	Ptpro	19277	ENSMUSG00000030223
ENSMUSG00000023992_Trem2	2.01323	0.209923	4.53752	0.00017008	0.00635204	0.939711	Trem2	83433	ENSMUSG00000023992
ENSMUSG00000070034_Sp110	1.57906	1.72245	4.57809	0.000154204	0.006158	0.93094	Sp110	109032	ENSMUSG00000070034
ENSMUSG00000033287_Kctd17	0.823232	2.21937	4.61233	0.000141969	0.00595515	0.92852	Kctd17	72844	ENSMUSG00000033287
ENSMUSG00000116903_Gm19522	-1.5734	1.04299	-4.54753	0.000166018	0.00632978	0.926759	Gm19522	100503040	ENSMUSG00000116903
ENSMUSG00000018965_Ywhah	0.522305	5.8481	4.77824	9.51777e-05	0.00494962	0.92534	Ywhah	22629	ENSMUSG00000018965
ENSMUSG00000020788_Atp2a3	1.36402	1.15814	4.54722	0.000166139	0.00632978	0.918559	Atp2a3	53313	ENSMUSG00000020788
ENSMUSG00000034906_Ncaph	2.01859	0.801096	4.53718	0.000170218	0.00635204	0.916027	Ncaph	215387	ENSMUSG00000034906
ENSMUSG00000045273_Cenph	2.95977	-2.00392	4.7267	0.000107752	0.00524546	0.915737	Cenph	26886	ENSMUSG00000045273
ENSMUSG00000053007_Creb5	3.22646	-2.16316	4.8351	8.30121e-05	0.00457917	0.915211	Creb5	231991	ENSMUSG00000053007
ENSMUSG00000097415_AU020206	1.26651	2.0105	4.59088	0.000149514	0.00612797	0.91188	NA	NA	ENSMUSG00000097415
ENSMUSG00000032245_Cln6	1.40605	2.06654	4.5908	0.000149543	0.00612797	0.911015	Cln6	76524	ENSMUSG00000032245
ENSMUSG00000051682_Treml4	1.91904	2.91492	4.64491	0.000131237	0.00585998	0.903829	Treml4	224840	ENSMUSG00000051682
ENSMUSG00000030409_Dmpk	1.34234	4.48604	4.73073	0.000106711	0.00524546	0.897032	Dmpk	13400	ENSMUSG00000030409
ENSMUSG00000044583_Tlr7	1.31767	1.44926	4.55017	0.000164962	0.00632978	0.893609	Tlr7	170743	ENSMUSG00000044583
ENSMUSG00000030220_Arhgdib	1.70406	3.95742	4.69845	0.000115342	0.00537355	0.892966	Arhgdib	11857	ENSMUSG00000030220
ENSMUSG00000095788_Sirpb1a	2.53904	-0.508649	4.50962	0.00018194	0.0065625	0.87682	Sirpb1a	320832	ENSMUSG00000095788
ENSMUSG00000026928_Card9	2.26345	-0.682384	4.54422	0.000167349	0.00632978	0.867145	Card9	332579	ENSMUSG00000026928
ENSMUSG00000029771_Irf5	0.832348	4.45342	4.71958	0.000109618	0.0052632	0.861667	Irf5	27056	ENSMUSG00000029771
ENSMUSG00000020275_Rel	1.00842	2.2186	4.57787	0.000154286	0.006158	0.857151	Rel	19696	ENSMUSG00000020275
ENSMUSG00000045328_Cenpe	3.17893	0.0879857	4.49579	0.000188125	0.00661618	0.847217	Cenpe	229841	ENSMUSG00000045328
ENSMUSG00000069516_Lyz2	1.63998	6.89231	4.73686	0.000105146	0.00524546	0.842821	Lyz2	17105	ENSMUSG00000069516
ENSMUSG00000000290_Itgb2	2.08589	4.17263	4.68746	0.000118439	0.00543797	0.842173	Itgb2	16414	ENSMUSG00000000290
ENSMUSG00000027134_Lpcat4	1.66597	-0.0236882	4.49488	0.000188537	0.00661618	0.836418	Lpcat4	99010	ENSMUSG00000027134
ENSMUSG00000026196_Bard1	2.2835	-1.62132	4.54344	0.000167667	0.00632978	0.826472	Bard1	12021	ENSMUSG00000026196
ENSMUSG00000000134_Tfe3	0.565556	4.62611	4.70904	0.000112435	0.00531357	0.821236	Tfe3	209446	ENSMUSG00000000134
ENSMUSG00000052593_Adam17	0.8227	4.38459	4.69837	0.000115364	0.00537355	0.820069	Adam17	11491	ENSMUSG00000052593
ENSMUSG00000026355_Mcm6	1.73439	3.13468	4.61449	0.000141234	0.00595515	0.818915	Mcm6	17219	ENSMUSG00000026355
ENSMUSG00000049988_Lrrc25	1.699	3.33033	4.63572	0.000134179	0.00590982	0.817305	Lrrc25	211228	ENSMUSG00000049988
ENSMUSG00000021200_Asb2	1.90379	2.60571	4.58499	0.000151655	0.00615606	0.810829	Asb2	65256	ENSMUSG00000021200
ENSMUSG00000028702_Rad54l	2.35747	-0.230123	4.49061	0.000190493	0.00664629	0.809206	Rad54l	19366	ENSMUSG00000028702
ENSMUSG00000047810_Ccdc88b	1.89012	2.06582	4.54584	0.000166696	0.00632978	0.809	Ccdc88b	78317	ENSMUSG00000047810
ENSMUSG00000034330_Plcg2	1.80819	2.14141	4.55336	0.000163696	0.00632978	0.808969	Plcg2	234779	ENSMUSG00000034330
ENSMUSG00000030759_Far1	1.37805	1.54209	4.51223	0.000180795	0.00653942	0.802365	Far1	67420	ENSMUSG00000030759
ENSMUSG00000041219_Arhgap11a	1.92072	1.37968	4.50548	0.00018377	0.00661009	0.801811	Arhgap11a	228482	ENSMUSG00000041219
ENSMUSG00000058799_Nap1l1	0.395836	5.65605	4.72545	0.000108076	0.00524546	0.799785	Nap1l1	53605	ENSMUSG00000058799
ENSMUSG00000030745_Il21r	2.27945	-0.183565	4.4874	0.00019198	0.00666473	0.799404	Il21r	60504	ENSMUSG00000030745
ENSMUSG00000026994_Galnt3	2.27002	-0.482583	4.48966	0.000190935	0.00664629	0.793188	Galnt3	14425	ENSMUSG00000026994
ENSMUSG00000030695_Aldoa	0.663657	6.91467	4.71884	0.000109813	0.0052632	0.792712	Aldoa	11674	ENSMUSG00000030695
ENSMUSG00000024053_Emilin2	1.73691	1.72513	4.51542	0.000179409	0.00652449	0.79066	Emilin2	246707	ENSMUSG00000024053
ENSMUSG00000034116_Vav1	1.86046	2.67611	4.58274	0.000152483	0.006158	0.790312	Vav1	22324	ENSMUSG00000034116
ENSMUSG00000004359_Spic	1.8943	1.9513	4.53514	0.000171061	0.00636515	0.790116	Spic	20728	ENSMUSG00000004359
ENSMUSG00000005667_Mthfd2	1.14215	1.71909	4.51434	0.000179878	0.00652449	0.786097	Mthfd2	17768	ENSMUSG00000005667
ENSMUSG00000044350_Lacc1	0.949225	3.29604	4.61886	0.00013975	0.00595515	0.785173	Lacc1	210808	ENSMUSG00000044350
ENSMUSG00000117975_Itprip	1.53297	0.657725	4.46963	0.000200404	0.00672454	0.78309	Itprip	414801	ENSMUSG00000117975
ENSMUSG00000020589_Cyria	1.70021	2.51031	4.56103	0.000160691	0.00630541	0.775393	Cyria	76820	ENSMUSG00000020589
ENSMUSG00000028581_Laptm5	1.64068	5.50157	4.6993	0.000115108	0.00537355	0.770418	Laptm5	16792	ENSMUSG00000028581
ENSMUSG00000037031_Tspan15	1.26815	2.66354	4.56821	0.000157929	0.00623483	0.764213	Tspan15	70423	ENSMUSG00000037031
ENSMUSG00000021880_Rnase6	1.75483	0.324747	4.45709	0.000206575	0.00684128	0.763107	Rnase6	78416	ENSMUSG00000021880
ENSMUSG00000035373_Ccl7	3.71034	-1.75204	4.62207	0.000138671	0.00595515	0.762584	Ccl7	20306	ENSMUSG00000035373
ENSMUSG00000031133_Arhgef6	1.11718	1.58062	4.49626	0.000187911	0.00661618	0.751541	Arhgef6	73341	ENSMUSG00000031133
ENSMUSG00000022372_Sla	2.01833	2.26938	4.53791	0.000169921	0.00635204	0.751136	Sla	20491	ENSMUSG00000022372
ENSMUSG00000044708_Kcnj10	1.56689	1.62677	4.50255	0.000185074	0.00661618	0.750425	Kcnj10	16513	ENSMUSG00000044708
ENSMUSG00000063193_Cd300lb	2.73334	0.804294	4.45335	0.000208452	0.00684529	0.736453	Cd300lb	217304	ENSMUSG00000063193
ENSMUSG00000030978_Rrm1	1.09757	3.65385	4.61726	0.00014029	0.00595515	0.735919	Rrm1	20133	ENSMUSG00000030978
ENSMUSG00000032740_Ccdc88a	1.67403	0.145734	4.44412	0.000213157	0.00686289	0.733821	Ccdc88a	108686	ENSMUSG00000032740
ENSMUSG00000030346_Rad51ap1	3.18779	-1.22297	4.49497	0.000188497	0.00661618	0.724696	Rad51ap1	19362	ENSMUSG00000030346
ENSMUSG00000018774_Cd68	1.5528	4.11986	4.63896	0.000133134	0.00590394	0.723817	Cd68	12514	ENSMUSG00000018774
ENSMUSG00000025317_Car5a	-0.435819	5.50849	-4.69261	0.000116976	0.00541051	0.722195	Car5a	12352	ENSMUSG00000025317
ENSMUSG00000046841_Ckap4	1.55532	2.25231	4.51606	0.000179129	0.00652449	0.711982	Ckap4	216197	ENSMUSG00000046841
ENSMUSG00000033685_Ucp2	1.37675	5.7383	4.67775	0.000121245	0.0054895	0.702602	Ucp2	22228	ENSMUSG00000033685
ENSMUSG00000000628_Hk2	1.72492	1.42026	4.45927	0.000205487	0.00682271	0.694824	Hk2	15277	ENSMUSG00000000628
ENSMUSG00000040339_Fam102b	1.12733	1.17574	4.43955	0.000215524	0.00687197	0.670905	Fam102b	329739	ENSMUSG00000040339
ENSMUSG00000068758_Il3ra	1.0175	1.91955	4.47456	0.000198033	0.00672454	0.663272	Il3ra	16188	ENSMUSG00000068758
ENSMUSG00000071708_Sms	0.743881	2.546	4.518	0.000178294	0.00652449	0.66248	Sms	20603	ENSMUSG00000071708
ENSMUSG00000022102_Dok2	2.3136	2.33466	4.49588	0.000188083	0.00661618	0.662046	Dok2	13449	ENSMUSG00000022102
ENSMUSG00000000682_Cd52	1.88026	4.06561	4.60849	0.000143293	0.00598549	0.661155	Cd52	23833	ENSMUSG00000000682
ENSMUSG00000012443_Kif11	2.37055	0.945531	4.421	0.000225412	0.00693252	0.653396	Kif11	16551	ENSMUSG00000012443
ENSMUSG00000015312_Gadd45b	1.77432	0.882117	4.4175	0.000227326	0.00695896	0.653116	Gadd45b	17873	ENSMUSG00000015312
ENSMUSG00000040990_Sh3kbp1	1.59048	1.49878	4.44407	0.000213178	0.00686289	0.635582	Sh3kbp1	58194	ENSMUSG00000040990
ENSMUSG00000071633_Gm4952	-0.763845	6.58944	-4.6555	0.000127927	0.00573191	0.634723	Gm4952	240549	ENSMUSG00000071633
ENSMUSG00000112023_Lilr4b	2.52975	1.00105	4.40939	0.000231833	0.00702637	0.632773	Lilr4b	14727	ENSMUSG00000112023
ENSMUSG00000048865_Arhgap30	1.58289	2.72859	4.51815	0.000178228	0.00652449	0.630773	Arhgap30	226652	ENSMUSG00000048865
ENSMUSG00000053318_Slamf8	2.25947	0.841761	4.40908	0.000232006	0.00702637	0.629988	Slamf8	74748	ENSMUSG00000053318
ENSMUSG00000095609_Gm21188	2.85394	-1.41142	4.43491	0.000217953	0.00687197	0.625863	Gm21188	100861753	ENSMUSG00000095609
ENSMUSG00000027715_Ccna2	2.35542	1.66636	4.4524	0.000208927	0.00684529	0.623355	Ccna2	12428	ENSMUSG00000027715
ENSMUSG00000047557_Lxn	1.35174	0.0881524	4.3927	0.000241381	0.00723272	0.620835	Lxn	17035	ENSMUSG00000047557
ENSMUSG00000030830_Itgal	1.95251	4.68055	4.61453	0.00014122	0.00595515	0.618662	Itgal	16408	ENSMUSG00000030830
ENSMUSG00000005410_Mcm5	2.36804	2.42971	4.47865	0.000196082	0.00672454	0.618048	Mcm5	17218	ENSMUSG00000005410
ENSMUSG00000022180_Slc7a8	1.72576	3.1587	4.54012	0.000169016	0.00635204	0.616682	Slc7a8	50934	ENSMUSG00000022180
ENSMUSG00000052760_A630001G21Rik	1.96281	-0.847241	4.43089	0.000220084	0.00687197	0.613155	A630001G21Rik	319997	ENSMUSG00000052760
ENSMUSG00000022945_Chaf1b	1.91348	0.696015	4.39189	0.000241854	0.00723272	0.611347	Chaf1b	110749	ENSMUSG00000022945
ENSMUSG00000079419_Ms4a6c	1.77049	2.6739	4.50231	0.000185182	0.00661618	0.598143	Ms4a6c	73656	ENSMUSG00000079419
ENSMUSG00000060216_Arrb2	1.19017	3.90662	4.57674	0.000154709	0.006158	0.591895	Arrb2	216869	ENSMUSG00000060216
ENSMUSG00000020476_Dbnl	0.561686	4.9872	4.62396	0.000138042	0.00595515	0.587351	Dbnl	13169	ENSMUSG00000020476
ENSMUSG00000018507_Trpv2	1.51735	1.37911	4.41228	0.000230217	0.00702637	0.581896	Trpv2	22368	ENSMUSG00000018507
ENSMUSG00000027641_Rbl1	1.40799	1.85075	4.43155	0.000219732	0.00687197	0.580485	Rbl1	19650	ENSMUSG00000027641
ENSMUSG00000031007_Atp6ap2	0.441912	5.06485	4.62349	0.000138197	0.00595515	0.580408	Atp6ap2	70495	ENSMUSG00000031007
ENSMUSG00000031389_Arhgap4	1.43486	2.57325	4.48	0.000195445	0.00672454	0.572583	Arhgap4	171207	ENSMUSG00000031389
ENSMUSG00000035891_Cerk	1.28466	2.44803	4.47102	0.000199731	0.00672454	0.569437	Cerk	223753	ENSMUSG00000035891
ENSMUSG00000021068_Nin	1.35692	1.77416	4.42717	0.000222075	0.00689603	0.567653	Nin	18080	ENSMUSG00000021068
ENSMUSG00000025743_Sdc3	1.51344	6.84141	4.62027	0.000139276	0.00595515	0.563768	Sdc3	20970	ENSMUSG00000025743
ENSMUSG00000034613_Ppm1h	1.49621	2.0454	4.43927	0.000215672	0.00687197	0.558445	Ppm1h	319468	ENSMUSG00000034613
ENSMUSG00000047832_Cdca4	1.0156	1.95485	4.43044	0.000220325	0.00687197	0.550487	Cdca4	71963	ENSMUSG00000047832
ENSMUSG00000006219_Fblim1	1.32064	1.27802	4.39581	0.000239571	0.00721444	0.550382	Fblim1	74202	ENSMUSG00000006219
ENSMUSG00000018008_Cyth4	1.91446	3.42194	4.5277	0.000174163	0.00643635	0.549654	Cyth4	72318	ENSMUSG00000018008
ENSMUSG00000032322_Pstpip1	1.96307	-0.301202	4.36637	0.000257253	0.00751958	0.54965	Pstpip1	19200	ENSMUSG00000032322
ENSMUSG00000057672_Pkn1	0.664304	4.94625	4.60663	0.000143937	0.00599307	0.548399	Pkn1	320795	ENSMUSG00000057672
ENSMUSG00000035186_Ubd	1.90954	2.10977	4.45483	0.000207708	0.0068438	0.538938	Ubd	24108	ENSMUSG00000035186
ENSMUSG00000038179_Slamf7	2.02178	-0.165132	4.35426	0.000264901	0.00757219	0.537558	Slamf7	75345	ENSMUSG00000038179
ENSMUSG00000072664_Ugt3a1	-0.653163	6.05088	-4.61514	0.00014101	0.00595515	0.531283	Ugt3a1	105887	ENSMUSG00000072664
ENSMUSG00000033777_Tlr13	1.69546	1.54423	4.4025	0.000235729	0.00711529	0.52872	Tlr13	279572	ENSMUSG00000033777
ENSMUSG00000018927_Ccl6	2.49297	3.80233	4.53148	0.000172581	0.00640331	0.526034	Ccl6	20305	ENSMUSG00000018927
ENSMUSG00000057191_AB124611	1.62736	2.75129	4.47212	0.000199204	0.00672454	0.523517	AB124611	382062	ENSMUSG00000057191
ENSMUSG00000078202_Nrarp	1.10254	1.0003	4.36188	0.000260067	0.00752222	0.516024	Nrarp	67122	ENSMUSG00000078202
ENSMUSG00000019132_BC005537	0.524002	7.12685	4.59447	0.000148226	0.00611266	0.500679	BC005537	79555	ENSMUSG00000019132
ENSMUSG00000099757_BE692007	2.04432	-0.338251	4.34137	0.000273295	0.00772685	0.488518	NA	NA	ENSMUSG00000099757
ENSMUSG00000027330_Cdc25b	2.22499	0.221722	4.33052	0.000280568	0.00779629	0.48348	Cdc25b	12531	ENSMUSG00000027330
ENSMUSG00000025154_Arhgap19	1.20188	2.6575	4.45142	0.000209426	0.00684529	0.478566	Arhgap19	71085	ENSMUSG00000025154
ENSMUSG00000078453_Abracl	0.68213	3.39934	4.49556	0.000188228	0.00661618	0.471983	Abracl	73112	ENSMUSG00000078453
ENSMUSG00000026390_Marco	2.59133	5.84767	4.55688	0.000162307	0.00632978	0.46916	Marco	17167	ENSMUSG00000026390
ENSMUSG00000045763_Basp1	1.7465	1.79191	4.38829	0.000243973	0.00726253	0.467326	Basp1	70350	ENSMUSG00000045763
ENSMUSG00000004207_Psap	0.816517	9.29224	4.54439	0.000167281	0.00632978	0.464795	Psap	19156	ENSMUSG00000004207
ENSMUSG00000027639_Samhd1	1.19829	4.87575	4.56503	0.000159147	0.00626382	0.464507	Samhd1	56045	ENSMUSG00000027639
ENSMUSG00000021906_Oxnad1	-0.359156	4.5727	-4.55903	0.000161467	0.00631674	0.459389	Oxnad1	218885	ENSMUSG00000021906
ENSMUSG00000027293_Ehd4	1.2311	3.5062	4.49173	0.00018998	0.00664629	0.456237	Ehd4	98878	ENSMUSG00000027293
ENSMUSG00000020493_Prr11	2.67106	-0.556707	4.31955	0.00028811	0.00797121	0.453565	Prr11	270906	ENSMUSG00000020493
ENSMUSG00000071172_Srsf3	0.533245	5.93682	4.57604	0.000154969	0.006158	0.438859	Srsf3	20383	ENSMUSG00000071172
ENSMUSG00000022436_Sh3bp1	1.37909	1.33514	4.34427	0.000271386	0.00768968	0.435138	Sh3bp1	20401	ENSMUSG00000022436
ENSMUSG00000002699_Lcp2	1.74126	3.15995	4.46092	0.000204669	0.00682271	0.429594	Lcp2	16822	ENSMUSG00000002699
ENSMUSG00000024486_Hbegf	1.36023	-0.101043	4.30079	0.000301491	0.00821856	0.416584	Hbegf	15200	ENSMUSG00000024486
ENSMUSG00000030089_Slc41a3	1.27213	0.150278	4.2972	0.000304119	0.00821856	0.412554	Slc41a3	71699	ENSMUSG00000030089
ENSMUSG00000021306_Gpr137b	1.46486	0.355764	4.29291	0.000307294	0.00825549	0.401436	Gpr137b	83924	ENSMUSG00000021306
ENSMUSG00000030148_Clec4a2	1.9813	1.86781	4.36326	0.000259197	0.00752222	0.399108	Clec4a2	26888	ENSMUSG00000030148
ENSMUSG00000045362_Tnfrsf26	2.03368	-0.373861	4.30145	0.000301008	0.00821856	0.394224	Tnfrsf26	244237	ENSMUSG00000045362
ENSMUSG00000036565_Ttyh3	1.03713	3.59824	4.47415	0.000198227	0.00672454	0.390773	Ttyh3	78339	ENSMUSG00000036565
ENSMUSG00000026786_Apbb1ip	1.83576	2.18123	4.37864	0.000249733	0.00734953	0.38787	Apbb1ip	54519	ENSMUSG00000026786
ENSMUSG00000032089_Il10ra	1.44537	2.61739	4.40866	0.000232241	0.00702637	0.387083	Il10ra	16154	ENSMUSG00000032089
ENSMUSG00000034947_Tmem106a	0.903668	3.46757	4.45962	0.000205312	0.00682271	0.372178	Tmem106a	217203	ENSMUSG00000034947
ENSMUSG00000020427_Igfbp3	-1.07504	4.51466	-4.51723	0.000178626	0.00652449	0.370494	Igfbp3	16009	ENSMUSG00000020427
ENSMUSG00000033059_Pygb	1.16243	3.48012	4.45055	0.000209869	0.00684529	0.367869	Pygb	110078	ENSMUSG00000033059
ENSMUSG00000031103_Elf4	1.58503	1.90341	4.35145	0.00026671	0.00760712	0.365227	Elf4	56501	ENSMUSG00000031103
ENSMUSG00000036894_Rap2b	1.55891	2.1677	4.36402	0.000258725	0.00752222	0.362908	Rap2b	74012	ENSMUSG00000036894
ENSMUSG00000030474_Siglece	1.73139	2.99268	4.42292	0.00022437	0.00691847	0.361547	Siglece	83382	ENSMUSG00000030474
ENSMUSG00000039208_Metrnl	1.47256	2.13347	4.35976	0.0002614	0.00752222	0.35941	Metrnl	210029	ENSMUSG00000039208
ENSMUSG00000027086_Fastkd1	-0.578382	3.6481	-4.47132	0.00019959	0.00672454	0.353096	Fastkd1	320720	ENSMUSG00000027086
ENSMUSG00000047534_Mis18bp1	2.74949	-1.35612	4.31869	0.000288709	0.00797121	0.351682	Mis18bp1	217653	ENSMUSG00000047534
ENSMUSG00000072596_Ear2	1.8162	2.26504	4.36845	0.000255967	0.00749891	0.349757	Ear2	13587	ENSMUSG00000072596
ENSMUSG00000000530_Acvrl1	1.44964	2.57807	4.38655	0.000245002	0.00727644	0.341066	Acvrl1	11482	ENSMUSG00000000530
ENSMUSG00000024030_Abcg1	1.68576	3.5185	4.44226	0.000214117	0.00686289	0.337669	Abcg1	11307	ENSMUSG00000024030
ENSMUSG00000037313_Tacc3	2.25188	1.37355	4.29648	0.00030465	0.00821856	0.328562	Tacc3	21335	ENSMUSG00000037313
ENSMUSG00000020077_Srgn	1.40924	3.54741	4.44311	0.000213677	0.00686289	0.327338	Srgn	19073	ENSMUSG00000020077
ENSMUSG00000025017_Pik3ap1	0.763136	5.71956	4.52698	0.000174466	0.00643635	0.327008	Pik3ap1	83490	ENSMUSG00000025017
ENSMUSG00000050379_Septin6	1.27898	0.479541	4.26146	0.000331593	0.00863943	0.324839	Septin6	56526	ENSMUSG00000050379
ENSMUSG00000020806_Rhbdf2	1.10705	3.53837	4.43674	0.00021699	0.00687197	0.315571	Rhbdf2	217344	ENSMUSG00000020806
ENSMUSG00000004677_Myo9b	0.63452	4.64415	4.49949	0.000186451	0.00661618	0.314765	Myo9b	17925	ENSMUSG00000004677
ENSMUSG00000003283_Hck	1.81798	3.47891	4.42961	0.000220769	0.00687197	0.309773	Hck	15162	ENSMUSG00000003283
ENSMUSG00000015355_Cd48	1.56808	2.04005	4.33874	0.00027504	0.00775924	0.309031	Cd48	12506	ENSMUSG00000015355
ENSMUSG00000056069_Otulinl	1.45518	2.05351	4.33749	0.000275871	0.00776028	0.307604	Otulinl	223433	ENSMUSG00000056069
ENSMUSG00000054404_Slfn5	0.879695	3.62618	4.4461	0.000212136	0.00686289	0.307003	Slfn5	327978	ENSMUSG00000054404
ENSMUSG00000002870_Mcm2	1.66764	2.54353	4.3589	0.000261944	0.00752222	0.305836	Mcm2	17216	ENSMUSG00000002870
ENSMUSG00000032815_Fanca	1.76123	0.0719802	4.24268	0.000347004	0.0089509	0.293377	Fanca	14087	ENSMUSG00000032815
ENSMUSG00000031101_Sash3	1.80064	1.47888	4.28647	0.000312123	0.00831623	0.284866	Sash3	74131	ENSMUSG00000031101
ENSMUSG00000039264_Gimap3	1.40544	1.13694	4.26824	0.000326193	0.00863943	0.284485	Gimap3	83408	ENSMUSG00000039264
ENSMUSG00000026548_Slamf9	2.74577	1.10701	4.26548	0.000328381	0.00863943	0.282459	Slamf9	98365	ENSMUSG00000026548
ENSMUSG00000022901_Cd86	1.67204	2.59899	4.3565	0.00026347	0.00754794	0.274676	Cd86	12524	ENSMUSG00000022901
ENSMUSG00000028718_Stil	3.0364	-1.53323	4.33158	0.000279846	0.00779629	0.251177	Stil	20460	ENSMUSG00000028718
ENSMUSG00000012519_Mlkl	1.11478	2.49603	4.33676	0.000276363	0.00776028	0.245366	Mlkl	74568	ENSMUSG00000012519
ENSMUSG00000037012_Hk1	1.30794	2.27996	4.32078	0.000287252	0.00796493	0.244443	Hk1	15275	ENSMUSG00000037012
ENSMUSG00000041112_Elmo1	1.60881	1.45061	4.26306	0.000330313	0.00863943	0.231869	Elmo1	140580	ENSMUSG00000041112
ENSMUSG00000021665_Hexb	0.810663	3.92879	4.42443	0.000223549	0.00691847	0.22557	Hexb	15212	ENSMUSG00000021665
ENSMUSG00000027398_Il1b	1.95934	1.98143	4.29431	0.000306253	0.00824463	0.225367	Il1b	16176	ENSMUSG00000027398
ENSMUSG00000011256_Adam19	1.15409	0.41814	4.21532	0.000370754	0.00935118	0.224975	Adam19	11492	ENSMUSG00000011256
ENSMUSG00000030935_Acsm3	-0.504503	5.79101	-4.48422	0.000193462	0.00669825	0.2178	Acsm3	20216	ENSMUSG00000030935
ENSMUSG00000030560_Ctsc	1.15378	7.34723	4.47094	0.000199772	0.00672454	0.212623	Ctsc	13032	ENSMUSG00000030560
ENSMUSG00000030786_Itgam	2.61418	1.28322	4.24721	0.000343228	0.00890672	0.208531	Itgam	16409	ENSMUSG00000030786
ENSMUSG00000099974_Bcl2a1d	2.68097	-0.41544	4.20703	0.000378266	0.00942035	0.199424	Bcl2a1d	12047	ENSMUSG00000099974
ENSMUSG00000042351_Grap2	1.48259	-0.472062	4.20263	0.000382317	0.00948395	0.196648	Grap2	17444	ENSMUSG00000042351
ENSMUSG00000024308_Tapbp	0.760483	6.77815	4.4712	0.000199646	0.00672454	0.195804	Tapbp	21356	ENSMUSG00000024308
ENSMUSG00000029674_Limk1	1.19239	1.73556	4.26219	0.000331003	0.00863943	0.195631	Limk1	16885	ENSMUSG00000029674
ENSMUSG00000025283_Sat1	0.905992	5.8335	4.47146	0.00019952	0.00672454	0.191201	Sat1	20229	ENSMUSG00000025283
ENSMUSG00000026110_Mgat4a	1.50953	0.813943	4.21298	0.000372862	0.00935695	0.186686	Mgat4a	269181	ENSMUSG00000026110
ENSMUSG00000055137_Sugct	-0.606201	4.64078	-4.44951	0.000210397	0.00684529	0.185865	Sugct	192136	ENSMUSG00000055137
ENSMUSG00000019254_Ppp1r12c	0.418348	4.44527	4.43809	0.000216286	0.00687197	0.184782	Ppp1r12c	232807	ENSMUSG00000019254
ENSMUSG00000058290_Espl1	2.97406	-0.385063	4.19181	0.000392454	0.00966137	0.179225	Espl1	105988	ENSMUSG00000058290
ENSMUSG00000081207_Gm13775	-1.3108	3.06775	-4.35883	0.000261991	0.00752222	0.177066	Mup-ps16	667278	ENSMUSG00000081207
ENSMUSG00000010122_Slc47a1	-0.510793	5.7949	-4.46658	0.000201889	0.00675518	0.175221	Slc47a1	67473	ENSMUSG00000010122
ENSMUSG00000039158_Akna	1.48952	1.8686	4.26362	0.000329866	0.00863943	0.169996	Akna	100182	ENSMUSG00000039158
ENSMUSG00000001729_Akt1	0.461782	5.64014	4.45602	0.000207107	0.00684141	0.155071	Akt1	11651	ENSMUSG00000001729
ENSMUSG00000095115_Itpripl2	1.28534	2.98972	4.33181	0.000279692	0.00779629	0.154466	Itpripl2	319622	ENSMUSG00000095115
ENSMUSG00000070031_Sp140	1.2125	2.30156	4.28853	0.000310568	0.00831475	0.154306	Sp140	434484	ENSMUSG00000070031
ENSMUSG00000022148_Fyb	1.66088	2.98196	4.33138	0.000279983	0.00779629	0.150768	Fyb	23880	ENSMUSG00000022148
ENSMUSG00000030189_Ybx3	0.532531	4.75947	4.43439	0.000218231	0.00687197	0.149777	Ybx3	56449	ENSMUSG00000030189
ENSMUSG00000048120_Entpd1	1.48898	3.25999	4.34776	0.000269105	0.00764177	0.145792	Entpd1	12495	ENSMUSG00000048120
ENSMUSG00000031093_Dock11	1.61145	0.841927	4.20001	0.000384746	0.00952595	0.145702	Dock11	75974	ENSMUSG00000031093
ENSMUSG00000013089_Etv5	1.2544	2.48592	4.28762	0.00031125	0.00831475	0.143517	Etv5	104156	ENSMUSG00000013089
ENSMUSG00000026456_Cyb5r1	0.605998	2.6524	4.30445	0.000298833	0.00818095	0.140745	Cyb5r1	72017	ENSMUSG00000026456
ENSMUSG00000025314_Ptprj	0.686577	5.89073	4.44651	0.000211924	0.00686289	0.129065	Ptprj	19271	ENSMUSG00000025314
ENSMUSG00000040111_Gramd1b	1.2537	0.789172	4.1827	0.000401203	0.00979508	0.12808	Gramd1b	235283	ENSMUSG00000040111
ENSMUSG00000059005_Hnrnpa3	0.448507	7.59273	4.43318	0.000218868	0.00687197	0.12704	Hnrnpa3	229279	ENSMUSG00000059005
ENSMUSG00000031709_Tbc1d9	1.54586	1.80092	4.2435	0.000346323	0.0089509	0.125305	Tbc1d9	71310	ENSMUSG00000031709
ENSMUSG00000000958_Slc7a7	1.03317	2.68905	4.29686	0.00030437	0.00821856	0.118661	Slc7a7	20540	ENSMUSG00000000958
ENSMUSG00000078683_Mup1	-2.62227	5.34877	-4.42006	0.000225927	0.00693252	0.113066	Mup1	17840	ENSMUSG00000078683
ENSMUSG00000019832_Rab32	0.524832	5.47065	4.43347	0.000218714	0.00687197	0.106472	Rab32	67844	ENSMUSG00000019832
ENSMUSG00000052889_Prkcb	1.6551	1.55338	4.21677	0.000369462	0.00934406	0.106323	Prkcb	18751	ENSMUSG00000052889
ENSMUSG00000004099_Dnmt1	0.992517	3.53756	4.34977	0.000267797	0.00762134	0.104197	Dnmt1	13433	ENSMUSG00000004099
ENSMUSG00000022584_Ly6c2	2.17528	1.08967	4.18903	0.000395103	0.00970814	0.100857	Ly6c2	100041546	ENSMUSG00000022584
ENSMUSG00000069607_Cd300ld3	1.6564	0.367844	4.16112	0.000422698	0.0100801	0.100381	Cd300ld3	382551	ENSMUSG00000069607
ENSMUSG00000015468_Notch4	0.866687	1.39579	4.19861	0.000386049	0.00953999	0.087342	Notch4	18132	ENSMUSG00000015468
ENSMUSG00000021190_Lgmn	1.26234	6.7552	4.42286	0.0002244	0.00691847	0.0838229	Lgmn	19141	ENSMUSG00000021190
ENSMUSG00000001642_Akr1b3	0.742493	4.12885	4.37162	0.000254009	0.00745841	0.0713214	Akr1b3	11677	ENSMUSG00000001642
ENSMUSG00000035283_Adrb1	1.45077	0.278853	4.13871	0.000446247	0.0104682	0.059052	Adrb1	11554	ENSMUSG00000035283
ENSMUSG00000022021_Diaph3	2.47515	-0.740449	4.13584	0.000449355	0.0105221	0.0545036	Diaph3	56419	ENSMUSG00000022021
ENSMUSG00000018654_Ikzf1	1.60311	2.0018	4.22481	0.000362338	0.00925428	0.053464	Ikzf1	22778	ENSMUSG00000018654
ENSMUSG00000052336_Cx3cr1	1.63959	0.647319	4.15827	0.000425624	0.0101127	0.0529835	Cx3cr1	13051	ENSMUSG00000052336
ENSMUSG00000071068_Treml2	2.16099	-0.467593	4.13943	0.000445471	0.0104682	0.0525978	Treml2	328833	ENSMUSG00000071068
ENSMUSG00000020009_Ifngr1	0.685429	4.54188	4.38141	0.000248065	0.00731708	0.0450867	Ifngr1	15979	ENSMUSG00000020009
ENSMUSG00000027359_Slc27a2	-0.542393	9.52261	-4.3613	0.000260429	0.00752222	0.0435052	Slc27a2	26458	ENSMUSG00000027359
ENSMUSG00000024660_Incenp	2.04673	1.98876	4.2096	0.000375924	0.00939931	0.0424916	Incenp	16319	ENSMUSG00000024660
ENSMUSG00000058427_Cxcl2	3.78675	-2.56213	4.46953	0.000200454	0.00672454	0.0416628	Cxcl2	20310	ENSMUSG00000058427
ENSMUSG00000028249_Sdcbp	0.638044	6.08052	4.40939	0.000231829	0.00702637	0.0402432	Sdcbp	53378	ENSMUSG00000028249
ENSMUSG00000029640_Usp12	0.837878	4.94973	4.39205	0.000241763	0.00723272	0.0373963	Usp12	22217	ENSMUSG00000029640
ENSMUSG00000020057_Dram1	2.379	1.21585	4.15972	0.000424135	0.0100958	0.0278316	Dram1	71712	ENSMUSG00000020057
ENSMUSG00000022667_Cd200r1	2.15041	0.140662	4.11777	0.000469428	0.0108547	0.0201152	Cd200r1	57781	ENSMUSG00000022667
ENSMUSG00000074491_Clec4g	-1.52931	5.5372	-4.38948	0.000243269	0.00725829	0.00711916	Clec4g	75863	ENSMUSG00000074491
ENSMUSG00000076928_Trac	2.04273	-0.799495	4.13132	0.000454294	0.0105803	-0.000891594	NA	NA	ENSMUSG00000076928
ENSMUSG00000022488_Nckap1l	1.58102	3.67111	4.31171	0.000293628	0.00807259	-0.00370998	Nckap1l	105855	ENSMUSG00000022488
ENSMUSG00000034255_Arhgap27	1.47865	1.70305	4.17668	0.000407086	0.00987059	-0.00636533	Arhgap27	544817	ENSMUSG00000034255
ENSMUSG00000040809_Chil3	2.67814	-0.483814	4.10755	0.000481174	0.0108929	-0.0114905	Chil3	12655	ENSMUSG00000040809
ENSMUSG00000032562_Gnai2	0.600164	6.66515	4.3843	0.000246336	0.00729871	-0.0138649	Gnai2	14678	ENSMUSG00000032562
ENSMUSG00000028927_Padi2	1.69879	-0.668823	4.10991	0.000478441	0.0108881	-0.0138764	Padi2	18600	ENSMUSG00000028927
ENSMUSG00000040663_Clcf1	1.8168	-0.527574	4.10832	0.000480278	0.0108916	-0.0145275	Clcf1	56708	ENSMUSG00000040663
ENSMUSG00000004508_Gab2	1.13011	1.89139	4.18534	0.000398645	0.00975815	-0.0164673	Gab2	14389	ENSMUSG00000004508
ENSMUSG00000024791_Cdca5	2.27555	-0.221335	4.09848	0.00049184	0.0109997	-0.021415	Cdca5	67849	ENSMUSG00000024791
ENSMUSG00000028656_Cap1	0.6973	6.15388	4.38339	0.000246879	0.00729871	-0.0219759	Cap1	12331	ENSMUSG00000028656
ENSMUSG00000031304_Il2rg	1.71978	2.69409	4.24089	0.000348512	0.00897193	-0.0233618	Il2rg	16186	ENSMUSG00000031304
ENSMUSG00000044562_Rasip1	1.05354	2.68748	4.23302	0.000355215	0.00912635	-0.0288366	Rasip1	69903	ENSMUSG00000044562
ENSMUSG00000029484_Anxa3	1.38202	2.62142	4.22116	0.000365551	0.00930852	-0.0453574	Anxa3	11745	ENSMUSG00000029484
ENSMUSG00000020689_Itgb3	1.17279	2.00009	4.1744	0.000409337	0.00987059	-0.046383	Itgb3	16416	ENSMUSG00000020689
ENSMUSG00000046722_Cdc42se1	0.604224	4.37897	4.33599	0.000276875	0.00776028	-0.048024	Cdc42se1	57912	ENSMUSG00000046722
ENSMUSG00000028480_Glipr2	1.1422	1.55787	4.14863	0.000435673	0.0102948	-0.050626	Glipr2	384009	ENSMUSG00000028480
ENSMUSG00000036246_Gmip	1.20366	2.21684	4.18814	0.000395958	0.00971073	-0.0596089	Gmip	78816	ENSMUSG00000036246
ENSMUSG00000020573_Pik3cg	1.82063	0.403086	4.08471	0.0005085	0.0111792	-0.0721365	Pik3cg	30955	ENSMUSG00000020573
ENSMUSG00000038467_Chmp4b	0.403954	6.07907	4.36273	0.000259533	0.00752222	-0.0750661	Chmp4b	75608	ENSMUSG00000038467
ENSMUSG00000045679_Pqlc3	1.58978	-0.593188	4.08167	0.000512242	0.0111823	-0.0770193	Pqlc3	217430	ENSMUSG00000045679
ENSMUSG00000024679_Ms4a6d	1.76335	2.23368	4.17526	0.000408485	0.00987059	-0.0947853	Ms4a6d	68774	ENSMUSG00000024679
ENSMUSG00000024397_Aif1	1.74747	3.78501	4.27531	0.000320664	0.00852625	-0.0954456	Aif1	11629	ENSMUSG00000024397
ENSMUSG00000039456_Morc3	0.731081	2.95915	4.22657	0.000360804	0.00925158	-0.0975777	Morc3	338467	ENSMUSG00000039456
ENSMUSG00000053101_Gpr141	2.99071	-1.7841	4.17444	0.000409302	0.00987059	-0.101392	Gpr141	353346	ENSMUSG00000053101
ENSMUSG00000036718_Micall2	0.919362	1.35597	4.11137	0.000476757	0.0108694	-0.10751	Micall2	231830	ENSMUSG00000036718
ENSMUSG00000059791_Nrm	1.68464	0.55457	4.06727	0.000530397	0.0113522	-0.107707	Nrm	106582	ENSMUSG00000059791
ENSMUSG00000048031_Fcrl5	2.8198	-2.02347	4.12169	0.000465	0.0107715	-0.108086	Fcrl5	329693	ENSMUSG00000048031
ENSMUSG00000038151_Prdm1	1.96478	-0.683038	4.06579	0.000532291	0.0113553	-0.11326	Prdm1	12142	ENSMUSG00000038151
ENSMUSG00000061132_Blnk	1.04386	0.841897	4.07724	0.000517763	0.0111823	-0.11975	Blnk	17060	ENSMUSG00000061132
ENSMUSG00000053063_Clec12a	1.56525	3.48581	4.25058	0.000340441	0.00885215	-0.120673	Clec12a	232413	ENSMUSG00000053063
ENSMUSG00000034342_Cbl	1.00667	3.38511	4.24453	0.000345461	0.00894675	-0.124998	Cbl	12402	ENSMUSG00000034342
ENSMUSG00000089809_Rasgef1b	1.19569	3.79998	4.26652	0.000327559	0.00863943	-0.126084	A930011G23Rik	319818	ENSMUSG00000089809
ENSMUSG00000046080_Clec9a	1.56613	0.449922	4.0573	0.000543335	0.0114096	-0.128515	Clec9a	232414	ENSMUSG00000046080
ENSMUSG00000072694_1500011B03Rik	1.33567	0.642044	4.06272	0.000536259	0.0113687	-0.129052	1500011B03Rik	66236	ENSMUSG00000072694
ENSMUSG00000041406_BC055324	2.01723	-0.962268	4.06905	0.000528115	0.0113221	-0.133305	BC055324	381306	ENSMUSG00000041406
ENSMUSG00000072620_Slfn2	1.78191	3.21802	4.217	0.000369254	0.00934406	-0.142358	Slfn2	20556	ENSMUSG00000072620
ENSMUSG00000048677_Tpcn2	1.03403	1.4609	4.1018	0.000487916	0.0109608	-0.146695	Tpcn2	233979	ENSMUSG00000048677
ENSMUSG00000017499_Cdc6	3.65909	-0.900272	4.07696	0.000518107	0.0111823	-0.152453	Cdc6	23834	ENSMUSG00000017499
ENSMUSG00000034708_Grn	0.731579	7.57593	4.31473	0.000291489	0.00803082	-0.156008	Grn	14824	ENSMUSG00000034708
ENSMUSG00000031838_Ifi30	1.75351	4.92988	4.2978	0.000303678	0.00821856	-0.161361	Ifi30	65972	ENSMUSG00000031838
ENSMUSG00000032254_Kif23	3.07343	0.204722	4.03459	0.000573979	0.011835	-0.167319	Kif23	71819	ENSMUSG00000032254
ENSMUSG00000027556_Car1	-1.18052	1.93054	-4.12227	0.000464347	0.0107715	-0.16875	Car1	12346	ENSMUSG00000027556
ENSMUSG00000056201_Cfl1	0.575969	7.67854	4.30758	0.000296579	0.00813643	-0.168985	Cfl1	12631	ENSMUSG00000056201
ENSMUSG00000053158_Fes	1.36684	2.77831	4.17949	0.000404331	0.00982304	-0.171041	Fes	14159	ENSMUSG00000053158
ENSMUSG00000067377_Tspan6	2.00592	-1.33052	4.0974	0.000493132	0.0110077	-0.172703	Tspan6	56496	ENSMUSG00000067377
ENSMUSG00000020823_Sec14l1	0.74787	4.02604	4.26334	0.000330084	0.00863943	-0.175389	Sec14l1	74136	ENSMUSG00000020823
ENSMUSG00000033467_Crlf2	0.712726	3.39076	4.22077	0.0003659	0.00930852	-0.186785	Crlf2	57914	ENSMUSG00000033467
ENSMUSG00000004530_Coro1c	0.565974	4.81123	4.28739	0.000311426	0.00831475	-0.200463	Coro1c	23790	ENSMUSG00000004530
ENSMUSG00000046591_Ticrr	3.512	-2.38132	4.2044	0.000380683	0.00946155	-0.201515	Ticrr	77011	ENSMUSG00000046591
ENSMUSG00000031271_Serpina7	1.22341	5.38129	4.29883	0.000302924	0.00821856	-0.201666	Serpina7	331535	ENSMUSG00000031271
ENSMUSG00000001741_Il16	0.841215	2.21927	4.13216	0.000453371	0.0105778	-0.203161	Il16	16170	ENSMUSG00000001741
ENSMUSG00000035439_Haus8	1.18273	2.1296	4.11575	0.000471731	0.0108694	-0.213191	Haus8	76478	ENSMUSG00000035439
ENSMUSG00000055675_Kbtbd11	1.47239	0.287307	4.01445	0.000602609	0.0122116	-0.21328	Kbtbd11	74901	ENSMUSG00000055675
ENSMUSG00000028068_Iqgap3	3.16322	-0.448652	4.00975	0.000609481	0.0123057	-0.214269	Iqgap3	404710	ENSMUSG00000028068
ENSMUSG00000027379_Bub1	2.90078	-1.2968	4.01736	0.000598378	0.0121448	-0.218004	Bub1	12235	ENSMUSG00000027379
ENSMUSG00000029561_Oasl2	1.18589	2.93148	4.17074	0.000412977	0.00993985	-0.220456	Oasl2	23962	ENSMUSG00000029561
ENSMUSG00000009292_Trpm2	1.55284	2.81507	4.16212	0.00042168	0.0100744	-0.222841	Trpm2	28240	ENSMUSG00000009292
ENSMUSG00000021108_Prkch	1.0065	1.89912	4.09405	0.000497148	0.0110421	-0.22489	Prkch	18755	ENSMUSG00000021108
ENSMUSG00000037544_Dlgap5	2.67708	-0.769105	4.00308	0.00061939	0.0123963	-0.226372	Dlgap5	218977	ENSMUSG00000037544
ENSMUSG00000041199_Rpusd1	0.680916	1.43616	4.06259	0.000536432	0.0113687	-0.226781	Rpusd1	106707	ENSMUSG00000041199
ENSMUSG00000051498_Tlr6	1.49257	-0.049439	4.00382	0.000618276	0.0123963	-0.227808	Tlr6	21899	ENSMUSG00000051498
ENSMUSG00000037217_Syn1	2.00826	-0.243899	4.0018	0.000621299	0.0123963	-0.229726	Syn1	20964	ENSMUSG00000037217
ENSMUSG00000037972_Snn	1.10571	0.908804	4.03337	0.000575675	0.011835	-0.230706	Snn	20621	ENSMUSG00000037972
ENSMUSG00000073982_Rhog	0.794276	4.6027	4.2643	0.000329318	0.00863943	-0.235966	Rhog	56212	ENSMUSG00000073982
ENSMUSG00000041695_Kcnj2	1.83293	-0.545636	4.00235	0.000620469	0.0123963	-0.237689	Kcnj2	16518	ENSMUSG00000041695
ENSMUSG00000054720_Lrrc8c	1.1629	2.32589	4.11438	0.000473289	0.0108694	-0.243225	Lrrc8c	100604	ENSMUSG00000054720
ENSMUSG00000038623_Tm6sf1	1.59166	1.9837	4.09165	0.000500034	0.0110494	-0.24619	Tm6sf1	107769	ENSMUSG00000038623
ENSMUSG00000024776_Stambpl1	1.96028	-0.367915	3.9951	0.000631443	0.0125024	-0.249827	Stambpl1	76630	ENSMUSG00000024776
ENSMUSG00000060131_Atp8b4	1.2196	1.08181	4.02967	0.000580847	0.0118634	-0.251488	Atp8b4	241633	ENSMUSG00000060131
ENSMUSG00000046410_Kcnk6	1.16619	1.91857	4.08067	0.000513493	0.0111823	-0.252942	Kcnk6	52150	ENSMUSG00000046410
ENSMUSG00000036931_Nfkbid	2.41666	-1.75038	4.06384	0.000534805	0.0113687	-0.255732	Nfkbid	243910	ENSMUSG00000036931
ENSMUSG00000039997_Ifi203	0.832863	3.00153	4.16325	0.00042053	0.0100744	-0.259327	Ifi203	15950	ENSMUSG00000039997
ENSMUSG00000028868_Wasf2	0.672089	4.94544	4.26556	0.000328322	0.00863943	-0.266715	Wasf2	242687	ENSMUSG00000028868
ENSMUSG00000041754_Trem3	3.66009	-1.96329	4.09047	0.000501463	0.0110621	-0.267645	Trem3	58218	ENSMUSG00000041754
ENSMUSG00000025287_Acot9	1.02206	2.23403	4.10212	0.000487535	0.0109608	-0.267892	Acot9	56360	ENSMUSG00000025287
ENSMUSG00000032841_Prr5l	1.10702	0.384595	3.9863	0.000644999	0.0126547	-0.279323	Prr5l	72446	ENSMUSG00000032841
ENSMUSG00000035455_Fignl1	2.40622	-0.550041	3.97531	0.000662343	0.0128393	-0.285796	Fignl1	60530	ENSMUSG00000035455
ENSMUSG00000028634_Hivep3	1.28489	0.182034	3.97165	0.000668218	0.0128953	-0.297886	Hivep3	16656	ENSMUSG00000028634
ENSMUSG00000000078_Klf6	1.10913	3.28416	4.16229	0.000421507	0.0100744	-0.299763	Klf6	23849	ENSMUSG00000000078
ENSMUSG00000015880_Ncapg	2.85583	-0.193012	3.96771	0.000674615	0.0129683	-0.305255	Ncapg	54392	ENSMUSG00000015880
ENSMUSG00000056220_Pla2g4a	1.5918	1.69036	4.04291	0.000562559	0.0116367	-0.306263	Pla2g4a	18783	ENSMUSG00000056220
ENSMUSG00000074342_I830077J02Rik	1.67547	0.114674	3.96747	0.000675005	0.0129683	-0.306599	I830077J02Rik	433638	ENSMUSG00000074342
ENSMUSG00000023015_Racgap1	2.36829	1.21379	4.02793	0.000583289	0.0118945	-0.313897	Racgap1	26934	ENSMUSG00000023015
ENSMUSG00000019935_Slc17a8	-1.43523	4.52754	-4.22539	0.000361832	0.00925428	-0.322621	Slc17a8	216227	ENSMUSG00000019935
ENSMUSG00000031387_Renbp	1.05043	1.97774	4.05722	0.00054343	0.0114096	-0.329776	Renbp	19703	ENSMUSG00000031387
ENSMUSG00000029863_Casp2	0.728237	2.02459	4.04656	0.000557616	0.0116042	-0.350934	Casp2	12366	ENSMUSG00000029863
ENSMUSG00000020019_Ntn4	-1.09861	2.75799	-4.09963	0.000490481	0.0109883	-0.35623	Ntn4	57764	ENSMUSG00000020019
ENSMUSG00000056290_Ms4a4b	1.68915	0.679072	3.96291	0.000682479	0.0129962	-0.361254	Ms4a4b	60361	ENSMUSG00000056290
ENSMUSG00000050919_Zfp366	1.3025	0.959975	3.97345	0.00066533	0.012878	-0.363995	Zfp366	238803	ENSMUSG00000050919
ENSMUSG00000041187_Prkd2	0.596209	2.92952	4.11141	0.00047671	0.0108694	-0.370598	Prkd2	101540	ENSMUSG00000041187
ENSMUSG00000027555_Car13	1.7441	-0.861701	3.95194	0.000700785	0.0132777	-0.370995	Car13	71934	ENSMUSG00000027555
ENSMUSG00000039783_Kmo	-0.414377	7.86063	-4.21924	0.000367255	0.00932467	-0.371912	Kmo	98256	ENSMUSG00000039783
ENSMUSG00000078688_Mup2	-0.903524	3.50453	-4.15006	0.000434166	0.0102779	-0.388662	Mup2	17841	ENSMUSG00000078688
ENSMUSG00000056666_Retsat	-0.938884	7.92458	-4.20951	0.000376002	0.00939931	-0.389827	Retsat	67442	ENSMUSG00000056666
ENSMUSG00000026600_Soat1	1.51416	2.63417	4.07627	0.000518979	0.0111823	-0.390709	Soat1	20652	ENSMUSG00000026600
ENSMUSG00000027852_Nras	0.475261	4.17752	4.18144	0.000402424	0.00979508	-0.395966	Nras	18176	ENSMUSG00000027852
ENSMUSG00000055541_Lair1	1.47721	2.46087	4.0609	0.000538629	0.0113966	-0.399161	Lair1	52855	ENSMUSG00000055541
ENSMUSG00000030413_Pglyrp1	1.84196	-1.56641	3.96311	0.000682136	0.0129962	-0.404942	Pglyrp1	21946	ENSMUSG00000030413
ENSMUSG00000039621_Prex1	1.35041	3.5561	4.13391	0.000451454	0.0105521	-0.414085	Prex1	277360	ENSMUSG00000039621
ENSMUSG00000058715_Fcer1g	1.61032	4.68889	4.18205	0.000401838	0.00979508	-0.421097	Fcer1g	14127	ENSMUSG00000058715
ENSMUSG00000024644_Cndp2	0.580314	5.76579	4.21484	0.000371187	0.00935118	-0.423778	Cndp2	66054	ENSMUSG00000024644
ENSMUSG00000030844_Rgs10	1.217	1.63706	3.98954	0.00063998	0.0125753	-0.426382	Rgs10	67865	ENSMUSG00000030844
ENSMUSG00000074677_Sirpb1c	2.43358	0.14329	3.91756	0.000761398	0.0139849	-0.42978	Sirpb1c	100038947	ENSMUSG00000074677
ENSMUSG00000058022_Adtrp	-0.57976	6.29277	-4.21387	0.000372055	0.00935483	-0.430067	Adtrp	109254	ENSMUSG00000058022
ENSMUSG00000029298_Gbp9	1.28378	2.76603	4.06932	0.000527765	0.0113221	-0.430232	Gbp9	236573	ENSMUSG00000029298
ENSMUSG00000044258_Ctla2a	1.29087	2.21949	4.02378	0.000589175	0.0119956	-0.432492	Ctla2a	13024	ENSMUSG00000044258
ENSMUSG00000069662_Marcks	1.01387	4.97683	4.19281	0.000391512	0.00965656	-0.43323	Marcks	17118	ENSMUSG00000069662
ENSMUSG00000022235_Cmbl	-0.576823	6.86253	-4.207	0.000378298	0.00942035	-0.434626	Cmbl	69574	ENSMUSG00000022235
ENSMUSG00000021485_Mxd3	2.6959	-1.12069	3.90621	0.000782527	0.0142317	-0.444795	Mxd3	17121	ENSMUSG00000021485
ENSMUSG00000033697_Arhgap39	0.738184	1.53759	3.97175	0.000668058	0.0128953	-0.45147	Arhgap39	223666	ENSMUSG00000033697
ENSMUSG00000002885_Adgre5	1.14738	4.62053	4.16667	0.000417071	0.0100198	-0.468768	Adgre5	26364	ENSMUSG00000002885
ENSMUSG00000058099_Nfam1	1.46162	3.3494	4.09644	0.000494275	0.0110077	-0.470959	Nfam1	74039	ENSMUSG00000058099
ENSMUSG00000037318_Traf3ip3	1.59914	-0.204862	3.88473	0.000824121	0.014591	-0.48016	Traf3ip3	215243	ENSMUSG00000037318
ENSMUSG00000027339_Rassf2	1.32386	0.945145	3.92421	0.000749274	0.0138543	-0.480347	Rassf2	215653	ENSMUSG00000027339
ENSMUSG00000037685_Atp8a1	1.38857	2.25878	4.00933	0.000610108	0.0123057	-0.483507	Atp8a1	11980	ENSMUSG00000037685
ENSMUSG00000024965_Fermt3	1.68709	3.21307	4.07851	0.000516173	0.0111823	-0.484094	Fermt3	108101	ENSMUSG00000024965
ENSMUSG00000034593_Myo5a	2.03881	-0.773042	3.89546	0.000803084	0.0143239	-0.486165	Myo5a	17918	ENSMUSG00000034593
ENSMUSG00000040345_Arhgap9	1.71496	2.13494	3.99383	0.000633375	0.0125215	-0.494086	Arhgap9	216445	ENSMUSG00000040345
ENSMUSG00000024737_Slc15a3	1.75957	3.82142	4.11173	0.000476332	0.0108694	-0.494097	Slc15a3	65221	ENSMUSG00000024737
ENSMUSG00000061666_Gdpd1	1.04331	0.0678115	3.88148	0.00083061	0.0146334	-0.495469	Gdpd1	66569	ENSMUSG00000061666
ENSMUSG00000031659_Adcy7	1.70722	2.19406	3.99759	0.000627654	0.0124779	-0.497019	Adcy7	11513	ENSMUSG00000031659
ENSMUSG00000044092_C130050O18Rik	1.97492	-0.0961549	3.87391	0.000845904	0.0147334	-0.503597	C130050O18Rik	319772	ENSMUSG00000044092
ENSMUSG00000005686_Ampd3	1.51944	0.239698	3.87957	0.000834441	0.014661	-0.50382	Ampd3	11717	ENSMUSG00000005686
ENSMUSG00000064210_Ano6	1.3029	3.4278	4.08231	0.00051145	0.0111823	-0.505041	Ano6	105722	ENSMUSG00000064210
ENSMUSG00000018920_Cxcl16	0.954393	3.72357	4.10683	0.000482015	0.0108929	-0.506223	Cxcl16	66102	ENSMUSG00000018920
ENSMUSG00000061758_Akr1b10	1.30119	1.22268	3.93198	0.000735363	0.0136813	-0.507657	Akr1b10	67861	ENSMUSG00000061758
ENSMUSG00000068566_Myadm	0.749966	4.6459	4.15186	0.000432279	0.010252	-0.508328	Myadm	50918	ENSMUSG00000068566
ENSMUSG00000046207_Pik3r6	1.33514	-0.346339	3.87027	0.000853349	0.0147334	-0.510525	Pik3r6	104709	ENSMUSG00000046207
ENSMUSG00000069793_Slfn9	1.55662	2.40761	4.00542	0.000615892	0.0123963	-0.510844	Slfn9	237886	ENSMUSG00000069793
ENSMUSG00000052949_Rnf157	1.30803	0.725167	3.8987	0.000796831	0.0143143	-0.512159	Rnf157	217340	ENSMUSG00000052949
ENSMUSG00000025473_Adam8	1.77784	-1.32024	3.89213	0.000809551	0.0144194	-0.512495	Adam8	11501	ENSMUSG00000025473
ENSMUSG00000062210_Tnfaip8	1.52459	1.97182	3.96648	0.000676618	0.01298	-0.524058	Tnfaip8	106869	ENSMUSG00000062210
ENSMUSG00000026177_Slc11a1	1.50599	4.07787	4.11563	0.000471867	0.0108694	-0.524167	Slc11a1	18173	ENSMUSG00000026177
ENSMUSG00000032178_Ilf3	0.603181	3.5303	4.08723	0.000505408	0.0111302	-0.526202	Ilf3	16201	ENSMUSG00000032178
ENSMUSG00000026536_Ifi211	1.48991	2.19651	3.98161	0.000652342	0.0127216	-0.530975	Ifi211	381308	ENSMUSG00000026536
ENSMUSG00000030539_Sema4b	0.659573	2.36576	3.99576	0.000630433	0.0125015	-0.536221	Sema4b	20352	ENSMUSG00000030539
ENSMUSG00000045312_Lhfpl2	-1.18048	2.53536	-4.00301	0.000619485	0.0123963	-0.536864	Lhfpl2	218454	ENSMUSG00000045312
ENSMUSG00000019992_Mtfr2	2.95793	-2.03986	3.93338	0.00073289	0.013655	-0.537149	Mtfr2	71804	ENSMUSG00000019992
ENSMUSG00000056529_Ptafr	1.67251	0.273525	3.86278	0.000868897	0.0149025	-0.537154	Ptafr	19204	ENSMUSG00000056529
ENSMUSG00000032066_Bco2	-0.434666	4.27639	-4.13022	0.000455502	0.0105894	-0.537903	Bco2	170752	ENSMUSG00000032066
ENSMUSG00000026482_Rgl1	0.877713	4.08048	4.11135	0.000476779	0.0108694	-0.543646	Rgl1	19731	ENSMUSG00000026482
ENSMUSG00000038811_Gngt2	1.3462	3.40299	4.06629	0.000531654	0.0113553	-0.545187	Gngt2	14710	ENSMUSG00000038811
ENSMUSG00000032436_Cmtm7	1.28966	2.35766	3.98541	0.000646387	0.0126627	-0.553007	Cmtm7	102545	ENSMUSG00000032436
ENSMUSG00000019433_Gipc1	0.641893	3.59398	4.07893	0.000515646	0.0111823	-0.553279	Gipc1	67903	ENSMUSG00000019433
ENSMUSG00000071713_Csf2rb	1.40024	3.48697	4.06341	0.00053536	0.0113687	-0.562411	Csf2rb	12983	ENSMUSG00000071713
ENSMUSG00000041135_Ripk2	1.13931	2.34882	3.98194	0.000651828	0.0127216	-0.569882	Ripk2	192656	ENSMUSG00000041135
ENSMUSG00000026274_Pask	2.008	-0.707349	3.85187	0.000892027	0.0152185	-0.570358	Pask	269224	ENSMUSG00000026274
ENSMUSG00000015437_Gzmb	2.02715	0.660499	3.86129	0.000872015	0.0149361	-0.571613	Gzmb	14939	ENSMUSG00000015437
ENSMUSG00000038943_Prc1	2.51281	0.832169	3.89698	0.000800132	0.0143239	-0.573836	Prc1	233406	ENSMUSG00000038943
ENSMUSG00000030895_Hpx	0.863442	12.8093	4.04402	0.000561051	0.0116241	-0.57565	Hpx	15458	ENSMUSG00000030895
ENSMUSG00000002055_Spag5	2.11147	0.0205453	3.84689	0.000902787	0.0153364	-0.576141	Spag5	54141	ENSMUSG00000002055
ENSMUSG00000026425_Srgap2	0.612646	3.75001	4.07556	0.000519864	0.0111823	-0.586474	Srgap2	14270	ENSMUSG00000026425
ENSMUSG00000040552_C3ar1	0.992997	1.88518	3.9428	0.00071641	0.0135121	-0.586868	C3ar1	12267	ENSMUSG00000040552
ENSMUSG00000038612_Mcl1	0.477763	6.50403	4.14557	0.0004389	0.0103521	-0.590265	Mcl1	17210	ENSMUSG00000038612
ENSMUSG00000071253_Slc25a16	-0.370908	5.64473	-4.14424	0.000440316	0.0103666	-0.594519	Slc25a16	73132	ENSMUSG00000071253
ENSMUSG00000022120_Obi1	0.95815	0.115682	3.83557	0.000927754	0.0156222	-0.596015	Obi1	72486	ENSMUSG00000022120
ENSMUSG00000031875_Cmtm3	1.04141	3.0892	4.02294	0.00059037	0.0120011	-0.599341	Cmtm3	68119	ENSMUSG00000031875
ENSMUSG00000070476_Fam217b	1.38553	-0.687184	3.83194	0.000935893	0.015698	-0.600712	Fam217b	71532	ENSMUSG00000070476
ENSMUSG00000005583_Mef2c	0.885878	1.17432	3.88327	0.000827024	0.01461	-0.601207	Mef2c	17260	ENSMUSG00000005583
ENSMUSG00000019979_Apaf1	1.06294	1.70122	3.91613	0.000764019	0.0140132	-0.601465	Apaf1	11783	ENSMUSG00000019979
ENSMUSG00000028270_Gbp2	1.80099	3.28664	4.03179	0.000577876	0.0118401	-0.60472	Gbp2	14469	ENSMUSG00000028270
ENSMUSG00000063146_Clip2	0.741932	1.92349	3.9356	0.000728973	0.0136015	-0.606355	Clip2	269713	ENSMUSG00000063146
ENSMUSG00000046711_Hmga1	0.640154	4.39944	4.10138	0.000488409	0.0109608	-0.609495	Hmga1	15361	ENSMUSG00000046711
ENSMUSG00000053219_Raet1e	-1.29509	1.16879	-3.88222	0.000829115	0.014627	-0.609677	Raet1e	379043	ENSMUSG00000053219
ENSMUSG00000024036_Slc37a1	1.36548	1.46127	3.90284	0.000788907	0.0142675	-0.610474	Slc37a1	224674	ENSMUSG00000024036
ENSMUSG00000037411_Serpine1	3.21601	-1.17889	3.82828	0.000944172	0.0157693	-0.619607	Serpine1	18787	ENSMUSG00000037411
ENSMUSG00000028885_Smpdl3b	1.9224	-0.471899	3.81912	0.00096523	0.0158614	-0.622481	Smpdl3b	100340	ENSMUSG00000028885
ENSMUSG00000027306_Nusap1	2.25838	0.841852	3.85256	0.000890544	0.0152133	-0.62849	Nusap1	108907	ENSMUSG00000027306
ENSMUSG00000027469_Tpx2	2.52939	0.858384	3.8762	0.000841232	0.0147006	-0.629156	Tpx2	72119	ENSMUSG00000027469
ENSMUSG00000042331_Specc1	1.07241	1.41901	3.88438	0.00082482	0.014591	-0.629595	Specc1	432572	ENSMUSG00000042331
ENSMUSG00000021322_Aoah	1.55991	1.33815	3.89025	0.000813229	0.014465	-0.629839	Aoah	27052	ENSMUSG00000021322
ENSMUSG00000002897_Il17ra	0.599957	4.08376	4.07834	0.000516386	0.0111823	-0.630748	Il17ra	16172	ENSMUSG00000002897
ENSMUSG00000031886_Ces2e	-0.58458	7.69146	-4.11293	0.000474951	0.0108694	-0.633105	Ces2e	234673	ENSMUSG00000031886
ENSMUSG00000029413_Naaa	1.24482	2.509	3.96357	0.000681391	0.0129962	-0.635034	Naaa	67111	ENSMUSG00000029413
ENSMUSG00000059552_Trp53	0.498379	4.21757	4.0815	0.000512453	0.0111823	-0.635113	Trp53	22059	ENSMUSG00000059552
ENSMUSG00000035778_Ggta1	1.1535	2.01671	3.92725	0.000743813	0.0137792	-0.637824	Ggta1	14594	ENSMUSG00000035778
ENSMUSG00000031557_Plekha2	1.28451	2.4175	3.9516	0.000701365	0.0132777	-0.638294	Plekha2	83436	ENSMUSG00000031557
ENSMUSG00000005087_Cd44	1.818	4.37976	4.07576	0.000519619	0.0111823	-0.640096	Cd44	12505	ENSMUSG00000005087
ENSMUSG00000051220_Ercc6l	3.14233	-0.990426	3.82023	0.000962655	0.0158614	-0.642513	Ercc6l	236930	ENSMUSG00000051220
ENSMUSG00000068686_Cd59b	-1.00382	1.33529	-3.87739	0.000838828	0.0147006	-0.643986	Cd59b	333883	ENSMUSG00000068686
ENSMUSG00000028163_Nfkb1	0.599014	4.52898	4.09301	0.000498388	0.0110494	-0.644458	Nfkb1	18033	ENSMUSG00000028163
ENSMUSG00000003809_Gcdh	-0.456985	8.60328	-4.09165	0.000500036	0.0110494	-0.645317	Gcdh	270076	ENSMUSG00000003809
ENSMUSG00000020577_Tspan13	1.11753	0.430022	3.81918	0.000965087	0.0158614	-0.653745	Tspan13	66109	ENSMUSG00000020577
ENSMUSG00000045664_Cdc42ep2	1.01336	2.06137	3.91843	0.000759804	0.0139754	-0.65413	Cdc42ep2	104252	ENSMUSG00000045664
ENSMUSG00000070323_Mmp27	2.28221	-0.128159	3.80305	0.00100328	0.0161988	-0.655941	Mmp27	234911	ENSMUSG00000070323
ENSMUSG00000036622_Atp13a2	0.859787	4.80501	4.09605	0.000494748	0.0110077	-0.656064	Atp13a2	74772	ENSMUSG00000036622
ENSMUSG00000015947_Fcgr1	1.52271	3.25893	4.00947	0.000609894	0.0123057	-0.657567	Fcgr1	14129	ENSMUSG00000015947
ENSMUSG00000056130_Ticam2	1.82884	-0.207282	3.8017	0.00100654	0.0162013	-0.661737	Ticam2	225471	ENSMUSG00000056130
ENSMUSG00000091780_Sco2	-0.760714	5.29034	-4.10902	0.000479466	0.0108916	-0.663504	Sco2	100126824	ENSMUSG00000091780
ENSMUSG00000030022_Adamts9	1.21728	1.07393	3.84386	0.000909403	0.0154134	-0.663872	Adamts9	101401	ENSMUSG00000030022
ENSMUSG00000074886_Grk6	0.494406	3.97452	4.05745	0.000543136	0.0114096	-0.667862	Grk6	26385	ENSMUSG00000074886
ENSMUSG00000075254_Heg1	0.916496	3.90774	4.04697	0.000557068	0.0116042	-0.669689	Heg1	77446	ENSMUSG00000075254
ENSMUSG00000004451_Ralb	0.664062	3.84424	4.04414	0.000560887	0.0116241	-0.672524	Ralb	64143	ENSMUSG00000004451
ENSMUSG00000046245_Pilra	1.54825	3.21705	3.99813	0.000626838	0.0124779	-0.679164	Pilra	231805	ENSMUSG00000046245
ENSMUSG00000031885_Cbfb	0.797569	3.93775	4.04605	0.000558299	0.0116042	-0.681897	Cbfb	12400	ENSMUSG00000031885
ENSMUSG00000026822_Lcn2	3.3375	4.70848	4.03899	0.000567906	0.0117286	-0.682084	Lcn2	16819	ENSMUSG00000026822
ENSMUSG00000017715_Pgs1	0.516313	3.74233	4.03328	0.0005758	0.011835	-0.68311	Pgs1	74451	ENSMUSG00000017715
ENSMUSG00000057789_Bak1	0.89267	4.17402	4.05548	0.000545731	0.0114347	-0.686852	Bak1	12018	ENSMUSG00000057789
ENSMUSG00000017652_Cd40	1.6136	-0.0755929	3.79128	0.0010321	0.0163836	-0.687026	Cd40	21939	ENSMUSG00000017652
ENSMUSG00000056737_Capg	2.34966	2.33748	3.92138	0.000754418	0.0139124	-0.687499	Capg	12332	ENSMUSG00000056737
ENSMUSG00000035473_Galm	-0.333287	6.73641	-4.10146	0.00048831	0.0109608	-0.690338	Galm	319625	ENSMUSG00000035473
ENSMUSG00000040675_Mthfd1l	1.88428	-0.193187	3.77598	0.00107079	0.0167056	-0.711333	Mthfd1l	270685	ENSMUSG00000040675
ENSMUSG00000031633_Slc25a4	1.11644	3.12629	3.97024	0.000670504	0.0129202	-0.715147	Slc25a4	11739	ENSMUSG00000031633
ENSMUSG00000025324_Atp10a	1.47086	-0.840282	3.77699	0.00106817	0.0166848	-0.720845	Atp10a	11982	ENSMUSG00000025324
ENSMUSG00000005465_Il27ra	1.21958	0.328629	3.78154	0.00105655	0.0165633	-0.721904	Il27ra	50931	ENSMUSG00000005465
ENSMUSG00000047798_Cd300lf	1.92369	0.431736	3.78802	0.00104022	0.0164066	-0.724818	Cd300lf	246746	ENSMUSG00000047798
ENSMUSG00000055737_Ghr	-0.380058	8.63935	-4.05706	0.000543651	0.0114096	-0.726193	Ghr	14600	ENSMUSG00000055737
ENSMUSG00000024742_Fen1	1.20214	2.74946	3.93039	0.000738198	0.0137144	-0.731735	Fen1	14156	ENSMUSG00000024742
ENSMUSG00000032094_Cd3d	1.74201	-0.336881	3.76575	0.00109743	0.0169376	-0.732425	Cd3d	12500	ENSMUSG00000032094
ENSMUSG00000042410_Agps	0.534538	3.58638	4.00343	0.000618864	0.0123963	-0.733783	Agps	228061	ENSMUSG00000042410
ENSMUSG00000022221_Ripk3	2.04976	0.984869	3.81351	0.000978345	0.0159755	-0.735387	Ripk3	56532	ENSMUSG00000022221
ENSMUSG00000057219_Armc7	1.04735	1.83205	3.86441	0.00086549	0.0148834	-0.743113	Armc7	276905	ENSMUSG00000057219
ENSMUSG00000008475_Arpc5	0.459381	6.41368	4.08138	0.000512609	0.0111823	-0.743943	Arpc5	67771	ENSMUSG00000008475
ENSMUSG00000024054_Smchd1	0.715795	3.29886	3.97862	0.000657079	0.0127755	-0.744195	Smchd1	74355	ENSMUSG00000024054
ENSMUSG00000025277_Abhd6	-0.556612	4.55543	-4.05278	0.000549303	0.011491	-0.744514	Abhd6	66082	ENSMUSG00000025277
ENSMUSG00000037731_Themis2	1.83275	3.26196	3.96515	0.000678792	0.0129962	-0.751169	Themis2	230787	ENSMUSG00000037731
ENSMUSG00000000409_Lck	1.56521	0.635928	3.78176	0.00105601	0.0165633	-0.754126	Lck	16818	ENSMUSG00000000409
ENSMUSG00000052776_Oas1a	1.12608	3.16753	3.96374	0.000681107	0.0129962	-0.754972	Oas1a	246730	ENSMUSG00000052776
ENSMUSG00000009185_Ccl8	2.0946	-2.10942	3.79114	0.00103244	0.0163836	-0.758782	Ccl8	20307	ENSMUSG00000009185
ENSMUSG00000036526_Card11	1.95576	-0.362142	3.75292	0.00113179	0.0173284	-0.762784	Card11	108723	ENSMUSG00000036526
ENSMUSG00000021725_Parp8	1.45882	0.106123	3.75453	0.00112744	0.0172977	-0.771081	Parp8	52552	ENSMUSG00000021725
ENSMUSG00000022587_Ly6e	0.694251	8.93397	4.03196	0.000577641	0.0118401	-0.773824	Ly6e	17069	ENSMUSG00000022587
ENSMUSG00000024301_Kifc5b	2.02443	-1.18666	3.76907	0.00108871	0.0168633	-0.77547	Kifc5b	16580	ENSMUSG00000024301
ENSMUSG00000023088_Abcc1	1.83516	1.38486	3.82013	0.000962872	0.0158614	-0.782639	Abcc1	17250	ENSMUSG00000023088
ENSMUSG00000024270_Slc39a6	1.00788	1.67304	3.83121	0.00093754	0.0157053	-0.784275	Slc39a6	106957	ENSMUSG00000024270
ENSMUSG00000019261_Map1s	0.761926	2.68018	3.90834	0.000778523	0.0142187	-0.789185	Map1s	270058	ENSMUSG00000019261
ENSMUSG00000035683_Melk	2.95807	-1.09127	3.7422	0.00116132	0.0176139	-0.78934	Melk	17279	ENSMUSG00000035683
ENSMUSG00000074671_Tspyl3	1.08852	-1.00949	3.74629	0.00114997	0.0174982	-0.789428	Tspyl3	241732	ENSMUSG00000074671
ENSMUSG00000040479_Dgkz	0.534577	5.11712	4.04976	0.000553326	0.0115565	-0.792995	Dgkz	104418	ENSMUSG00000040479
ENSMUSG00000030921_Trim30a	1.01695	3.07181	3.93812	0.000724544	0.0135973	-0.797915	Trim30a	20128	ENSMUSG00000030921
ENSMUSG00000027030_Stk39	0.998449	1.09512	3.78993	0.00103545	0.0164066	-0.798283	Stk39	53416	ENSMUSG00000027030
ENSMUSG00000027940_Tpm3	0.647991	6.48324	4.05771	0.000542786	0.0114096	-0.798662	Tpm3	59069	ENSMUSG00000027940
ENSMUSG00000034786_Gpsm3	1.2922	2.39458	3.88675	0.000820113	0.0145564	-0.799975	Gpsm3	106512	ENSMUSG00000034786
ENSMUSG00000032783_Troap	2.97453	-1.83114	3.7714	0.00108262	0.0168294	-0.805155	Troap	78733	ENSMUSG00000032783
ENSMUSG00000079685_Ulbp1	2.14917	-0.474614	3.72998	0.00119592	0.0178785	-0.807522	Ulbp1	77777	ENSMUSG00000079685
ENSMUSG00000048779_P2ry6	1.38208	1.59209	3.82567	0.000950125	0.015814	-0.808057	P2ry6	233571	ENSMUSG00000048779
ENSMUSG00000024349_Sting1	1.40565	1.82386	3.8332	0.000933044	0.0156909	-0.810733	Sting1	72512	ENSMUSG00000024349
ENSMUSG00000032690_Oas2	1.31623	1.26478	3.7932	0.00102734	0.0163601	-0.812852	Oas2	246728	ENSMUSG00000032690
ENSMUSG00000023915_Tnfrsf21	0.938388	2.79729	3.90705	0.000780939	0.0142317	-0.817046	Tnfrsf21	94185	ENSMUSG00000023915
ENSMUSG00000028599_Tnfrsf1b	0.693812	4.85071	4.02997	0.000580431	0.0118634	-0.817809	Tnfrsf1b	21938	ENSMUSG00000028599
ENSMUSG00000090038_Gm16573	-0.907333	1.18004	-3.79377	0.00102594	0.0163601	-0.818056	Gm16573	102635191	ENSMUSG00000090038
ENSMUSG00000033033_Calhm2	1.11522	1.10184	3.7868	0.00104329	0.016415	-0.82742	Calhm2	72691	ENSMUSG00000033033
ENSMUSG00000017146_Brca1	1.56803	0.575768	3.75206	0.00113414	0.0173284	-0.829159	Brca1	12189	ENSMUSG00000017146
ENSMUSG00000040616_Tmem51	1.00711	3.34959	3.94253	0.000716873	0.0135121	-0.83006	Tmem51	214359	ENSMUSG00000040616
ENSMUSG00000032231_Anxa2	1.01965	4.2721	3.99234	0.000635664	0.0125373	-0.842803	Anxa2	12306	ENSMUSG00000032231
ENSMUSG00000071715_Ncf4	1.37593	1.43814	3.80249	0.00100463	0.0162004	-0.843645	Ncf4	17972	ENSMUSG00000071715
ENSMUSG00000050860_Phospho1	-1.10216	3.27241	-3.94098	0.000719568	0.0135431	-0.845305	Phospho1	237928	ENSMUSG00000050860
ENSMUSG00000006519_Cyba	1.43991	4.37833	3.99075	0.000638108	0.0125575	-0.8489	Cyba	13057	ENSMUSG00000006519
ENSMUSG00000053398_Phgdh	1.89147	-1.00221	3.71519	0.00123916	0.0182339	-0.857429	Phgdh	236539	ENSMUSG00000053398
ENSMUSG00000038843_Gcnt1	1.71554	-0.184111	3.71189	0.00124899	0.0183369	-0.85959	Gcnt1	14537	ENSMUSG00000038843
ENSMUSG00000043004_Gng2	1.32523	1.56838	3.79826	0.0010149	0.0163052	-0.86325	Gng2	14702	ENSMUSG00000043004
ENSMUSG00000028071_Sh2d2a	1.63514	-0.801146	3.70263	0.00127705	0.0186222	-0.865831	Sh2d2a	27371	ENSMUSG00000028071
ENSMUSG00000003500_Impdh1	1.23637	1.94151	3.81824	0.000967274	0.0158748	-0.866607	Impdh1	23917	ENSMUSG00000003500
ENSMUSG00000027506_Tpd52	0.767071	4.40328	3.99205	0.000636112	0.0125373	-0.866963	Tpd52	21985	ENSMUSG00000027506
ENSMUSG00000017716_Birc5	2.52698	1.11677	3.76769	0.00109232	0.0168796	-0.869342	Birc5	11799	ENSMUSG00000017716
ENSMUSG00000024696_Lpxn	1.53526	1.3345	3.77269	0.00107927	0.0167975	-0.870928	Lpxn	107321	ENSMUSG00000024696
ENSMUSG00000030402_Ppm1n	3.46475	-2.41558	3.87287	0.000848019	0.0147334	-0.872626	Ppm1n	232941	ENSMUSG00000030402
ENSMUSG00000028995_Fam126a	0.67614	3.01983	3.89961	0.000795074	0.0143143	-0.874376	Fam126a	84652	ENSMUSG00000028995
ENSMUSG00000019194_Scn1b	0.800532	2.44721	3.85828	0.000878362	0.015025	-0.880409	Scn1b	20266	ENSMUSG00000019194
ENSMUSG00000040747_Cd53	1.42244	3.73097	3.94506	0.000712524	0.0134693	-0.883308	Cd53	12508	ENSMUSG00000040747
ENSMUSG00000026103_Gls	1.03822	2.4715	3.85014	0.000895756	0.015262	-0.883702	Gls	14660	ENSMUSG00000026103
ENSMUSG00000016496_Cd274	1.71045	2.05094	3.82234	0.000957763	0.0158594	-0.883968	Cd274	60533	ENSMUSG00000016496
ENSMUSG00000028832_Stmn1	1.59396	3.63324	3.92751	0.000743345	0.0137792	-0.885833	Stmn1	16765	ENSMUSG00000028832
ENSMUSG00000039585_Myo9a	1.54532	2.67756	3.87229	0.000849212	0.0147334	-0.888645	Myo9a	270163	ENSMUSG00000039585
ENSMUSG00000101389_Ms4a4a	3.1577	-2.69675	3.81677	0.000970695	0.0158907	-0.891041	Ms4a4a	666907	ENSMUSG00000101389
ENSMUSG00000048327_Ckap2l	2.26716	0.535539	3.73353	0.00118578	0.0178488	-0.891206	Ckap2l	70466	ENSMUSG00000048327
ENSMUSG00000004317_Clcn5	0.662003	2.34353	3.83754	0.000923347	0.0155683	-0.892509	Clcn5	12728	ENSMUSG00000004317
ENSMUSG00000036469_Marchf1	1.5372	1.67963	3.79345	0.00102672	0.0163601	-0.893903	Marchf1	72925	ENSMUSG00000036469
ENSMUSG00000047945_Marcksl1	0.900113	4.02205	3.95837	0.000689998	0.0131008	-0.897203	Marcksl1	17357	ENSMUSG00000047945
ENSMUSG00000042901_Aida	0.653744	3.21454	3.90674	0.000781529	0.0142317	-0.898643	Aida	108909	ENSMUSG00000042901
ENSMUSG00000036587_Fut7	2.5243	-1.30358	3.70381	0.00127344	0.0185904	-0.904864	Fut7	14347	ENSMUSG00000036587
ENSMUSG00000073489_Ifi204	1.27939	3.55908	3.92381	0.000750008	0.0138543	-0.905182	Ifi204	15951	ENSMUSG00000073489
ENSMUSG00000037337_Map4k1	1.59537	0.148945	3.69371	0.00130469	0.0189187	-0.90559	Map4k1	26411	ENSMUSG00000037337
ENSMUSG00000029925_Tbxas1	1.58511	2.35261	3.83216	0.000935403	0.015698	-0.913693	Tbxas1	21391	ENSMUSG00000029925
ENSMUSG00000078521_Aunip	2.98743	-2.55547	3.77437	0.00107492	0.0167499	-0.922123	Aunip	69885	ENSMUSG00000078521
ENSMUSG00000023277_Twf2	1.17857	2.35946	3.82361	0.000954842	0.0158516	-0.926446	Twf2	23999	ENSMUSG00000023277
ENSMUSG00000102418_Sh2d1b1	2.31697	-2.18963	3.72081	0.00122255	0.0180717	-0.930948	Sh2d1b1	26904	ENSMUSG00000102418
ENSMUSG00000094793_Mup12	-1.88189	2.30728	-3.82989	0.000940519	0.0157349	-0.941328	Mup12	100039054	ENSMUSG00000094793
ENSMUSG00000010751_Tnfrsf22	1.39505	0.0501973	3.67058	0.00137908	0.0197049	-0.943176	Tnfrsf22	79202	ENSMUSG00000010751
ENSMUSG00000042759_Apobr	1.61776	1.51269	3.75106	0.00113688	0.0173284	-0.945155	Apobr	171504	ENSMUSG00000042759
ENSMUSG00000027514_Zbp1	1.51123	3.4431	3.89664	0.000800796	0.0143239	-0.945546	Zbp1	58203	ENSMUSG00000027514
ENSMUSG00000034438_Gbp8	1.40319	2.09029	3.80144	0.00100718	0.0162013	-0.946805	Gbp8	76074	ENSMUSG00000034438
ENSMUSG00000013997_Nit1	-0.315048	6.33411	-3.99718	0.000628278	0.0124779	-0.946898	Nit1	27045	ENSMUSG00000013997
ENSMUSG00000018293_Pfn1	0.545999	7.74016	3.97964	0.000655448	0.012763	-0.948655	Pfn1	18643	ENSMUSG00000018293
ENSMUSG00000020037_Rfx4	-1.38694	0.814098	-3.71038	0.00125353	0.0183828	-0.958954	Rfx4	71137	ENSMUSG00000020037
ENSMUSG00000062127_Cttnbp2nl	1.22623	2.48478	3.82134	0.000960077	0.0158614	-0.963003	Cttnbp2nl	80281	ENSMUSG00000062127
ENSMUSG00000027479_Mapre1	0.464305	5.03158	3.97543	0.000662146	0.0128393	-0.964476	Mapre1	13589	ENSMUSG00000027479
ENSMUSG00000039396_Neil3	2.79332	-1.72831	3.67864	0.00135269	0.019419	-0.967602	Neil3	234258	ENSMUSG00000039396
ENSMUSG00000026581_Sell	1.38551	1.27089	3.72979	0.00119646	0.0178785	-0.967604	Sell	20343	ENSMUSG00000026581
ENSMUSG00000022440_C1qtnf6	1.4002	0.939895	3.698	0.00129131	0.0187668	-0.971101	C1qtnf6	72709	ENSMUSG00000022440
ENSMUSG00000040710_St8sia4	1.41087	-0.0733255	3.65735	0.00142349	0.0199273	-0.97238	St8sia4	20452	ENSMUSG00000040710
ENSMUSG00000038217_Tlcd2	-0.523939	6.63592	-3.98293	0.000650262	0.0127194	-0.975175	Tlcd2	380712	ENSMUSG00000038217
ENSMUSG00000039187_Fanci	2.54746	-1.18983	3.66538	0.00139635	0.0198044	-0.978692	Fanci	208836	ENSMUSG00000039187
ENSMUSG00000019943_Atp2b1	0.725627	4.76426	3.96058	0.000686316	0.0130501	-0.979074	Atp2b1	67972	ENSMUSG00000019943
ENSMUSG00000050106_Tmc8	1.59599	1.31374	3.72358	0.00121444	0.0180135	-0.979453	Tmc8	217356	ENSMUSG00000050106
ENSMUSG00000031453_Rasa3	0.981468	3.23825	3.87046	0.000852968	0.0147334	-0.983491	Rasa3	19414	ENSMUSG00000031453
ENSMUSG00000027678_Ncoa3	0.698148	4.348	3.94031	0.000720734	0.0135454	-0.987857	Ncoa3	17979	ENSMUSG00000027678
ENSMUSG00000023026_Dip2b	0.783595	2.52556	3.81458	0.000975829	0.0159546	-0.989504	Dip2b	239667	ENSMUSG00000023026
ENSMUSG00000027875_Hmgcs2	-0.590412	10.5413	-3.90478	0.000785235	0.0142438	-0.994888	Hmgcs2	15360	ENSMUSG00000027875
ENSMUSG00000040711_Sh3pxd2b	2.34252	0.789679	3.67897	0.00135162	0.019419	-0.997783	Sh3pxd2b	268396	ENSMUSG00000040711
ENSMUSG00000032890_Rims3	1.32769	1.43204	3.73317	0.0011868	0.0178488	-0.997793	Rims3	242662	ENSMUSG00000032890
ENSMUSG00000021697_Depdc1b	2.64378	-2.55616	3.71902	0.0012278	0.0181079	-0.99782	Depdc1b	218581	ENSMUSG00000021697
ENSMUSG00000032431_Crtap	0.534293	3.04021	3.84839	0.00089953	0.0153062	-0.998475	Crtap	56693	ENSMUSG00000032431
ENSMUSG00000044229_Nxpe4	1.61284	-0.0867853	3.64591	0.00146302	0.0204146	-0.99947	Nxpe4	244853	ENSMUSG00000044229
ENSMUSG00000032113_Chek1	1.99269	-0.498996	3.63372	0.00150636	0.0207289	-1.00894	Chek1	12649	ENSMUSG00000032113
ENSMUSG00000003038_Hmgn2	0.902086	4.63351	3.93717	0.000726215	0.0136013	-1.00989	Hmgn2	15331	ENSMUSG00000003038
ENSMUSG00000024174_Pot1b	1.06061	1.33192	3.71277	0.00124636	0.0183192	-1.01508	Pot1b	72836	ENSMUSG00000024174
ENSMUSG00000027490_E2f1	0.964718	2.30768	3.78289	0.00105312	0.0165496	-1.01851	E2f1	13555	ENSMUSG00000027490
ENSMUSG00000027035_Cers6	1.00844	3.12601	3.84049	0.000916821	0.0154986	-1.02092	Cers6	241447	ENSMUSG00000027035
ENSMUSG00000021423_Ly86	1.39515	3.41162	3.86584	0.000862509	0.0148717	-1.02256	Ly86	17084	ENSMUSG00000021423
ENSMUSG00000030766_Arhgap17	0.610569	3.46599	3.87027	0.000853353	0.0147334	-1.02987	Arhgap17	70497	ENSMUSG00000030766
ENSMUSG00000038608_Dock10	1.53278	2.64378	3.80741	0.000992819	0.016135	-1.03271	Dock10	210293	ENSMUSG00000038608
ENSMUSG00000026321_Tnfrsf11a	1.75328	0.357017	3.64487	0.00146668	0.0204216	-1.03331	Tnfrsf11a	21934	ENSMUSG00000026321
ENSMUSG00000025366_Esyt1	0.578211	4.38973	3.92089	0.000755301	0.0139124	-1.03425	Esyt1	23943	ENSMUSG00000025366
ENSMUSG00000037280_Galnt6	1.62843	0.857519	3.66786	0.00138809	0.0197739	-1.03699	Galnt6	207839	ENSMUSG00000037280
ENSMUSG00000044768_Macir	0.597858	3.66118	3.87653	0.000840573	0.0147006	-1.03785	Macir	52392	ENSMUSG00000044768
ENSMUSG00000043263_Ifi209	1.47415	1.80077	3.72958	0.00119707	0.0178785	-1.04338	Ifi209	236312	ENSMUSG00000043263
ENSMUSG00000043157_Arl11	1.93215	-0.668746	3.61597	0.00157171	0.0211347	-1.04589	Arl11	219144	ENSMUSG00000043157
ENSMUSG00000078763_Slfn1	2.11525	-0.316127	3.61591	0.00157195	0.0211347	-1.04623	Slfn1	20555	ENSMUSG00000078763
ENSMUSG00000022438_Parvb	1.21478	2.37295	3.76975	0.00108695	0.0168561	-1.05051	Parvb	170736	ENSMUSG00000022438
ENSMUSG00000060509_Xcr1	1.56839	-0.191166	3.61979	0.00155741	0.021095	-1.05188	Xcr1	23832	ENSMUSG00000060509
ENSMUSG00000069919_Hba-a1	2.36607	5.63238	3.93654	0.000727311	0.0136013	-1.05292	Hba-a1	15122	ENSMUSG00000069919
ENSMUSG00000044162_Tnip3	3.03244	-3.07408	3.81193	0.000982075	0.0159961	-1.05297	Tnip3	414084	ENSMUSG00000044162
ENSMUSG00000026683_Nuf2	2.46571	0.0855132	3.63436	0.00150405	0.0207191	-1.05942	Nuf2	66977	ENSMUSG00000026683
ENSMUSG00000057135_Scimp	1.66458	0.924136	3.66575	0.00139511	0.0198044	-1.05975	Scimp	327957	ENSMUSG00000057135
ENSMUSG00000007080_Pole	1.47135	0.997936	3.66413	0.00140054	0.0198126	-1.06658	Pole	18973	ENSMUSG00000007080
ENSMUSG00000030159_Clec1b	1.26985	3.76515	3.8652	0.000863841	0.0148748	-1.07386	Clec1b	56760	ENSMUSG00000030159
ENSMUSG00000038342_Mlxip	0.827734	2.78779	3.79753	0.00101671	0.0163139	-1.07624	Mlxip	208104	ENSMUSG00000038342
ENSMUSG00000035212_Leprot	0.610601	4.37379	3.90101	0.000792404	0.0143108	-1.07907	Leprot	230514	ENSMUSG00000035212
ENSMUSG00000039294_Cybc1	0.705147	3.40915	3.84303	0.000911217	0.015424	-1.07935	Cybc1	217370	ENSMUSG00000039294
ENSMUSG00000033278_Ptprm	1.30898	1.63228	3.70207	0.00127877	0.0186263	-1.08078	Ptprm	19274	ENSMUSG00000033278
ENSMUSG00000030263_Lrmp	1.51737	1.68138	3.70924	0.00125697	0.0184124	-1.08399	Lrmp	16970	ENSMUSG00000030263
ENSMUSG00000021115_Vrk1	0.674654	2.32772	3.75567	0.00112434	0.0172911	-1.08808	Vrk1	22367	ENSMUSG00000021115
ENSMUSG00000031146_Plp2	1.15632	0.790221	3.64144	0.00147877	0.0205457	-1.08843	Plp2	18824	ENSMUSG00000031146
ENSMUSG00000052681_Rap1b	0.814898	6.06065	3.9362	0.000727912	0.0136013	-1.09043	Rap1b	215449	ENSMUSG00000052681
ENSMUSG00000070436_Serpinh1	0.790678	4.58802	3.90315	0.000788329	0.0142675	-1.09212	Serpinh1	12406	ENSMUSG00000070436
ENSMUSG00000010651_Acaa1b	-0.613745	10.0076	-3.87102	0.000851808	0.0147334	-1.09924	Acaa1b	235674	ENSMUSG00000010651
ENSMUSG00000037995_Igsf9	2.18842	-1.66208	3.63889	0.00148783	0.0206273	-1.10383	Igsf9	93842	ENSMUSG00000037995
ENSMUSG00000030365_Clec2i	1.58477	-0.750219	3.58813	0.00167987	0.0220513	-1.10468	Clec2i	93675	ENSMUSG00000030365
ENSMUSG00000029233_Srd5a3	0.417512	3.21866	3.81701	0.000970139	0.0158907	-1.10923	Srd5a3	57357	ENSMUSG00000029233
ENSMUSG00000061533_Cep128	1.51015	-0.0491128	3.58914	0.00167582	0.0220307	-1.10939	Cep128	75216	ENSMUSG00000061533
ENSMUSG00000036948_Map11	0.635012	3.3056	3.82276	0.00095681	0.0158594	-1.11215	Map11	231807	ENSMUSG00000036948
ENSMUSG00000050350_Gpr18	1.89283	-1.41917	3.60229	0.001624	0.0215463	-1.11447	Gpr18	110168	ENSMUSG00000050350
ENSMUSG00000079553_Kifc1	2.60846	0.299567	3.6138	0.00157991	0.0211347	-1.11546	Kifc1	100502766	ENSMUSG00000079553
ENSMUSG00000020668_Kif3c	1.24355	1.02042	3.63796	0.00149114	0.020651	-1.11973	Kif3c	16570	ENSMUSG00000020668
ENSMUSG00000034271_Jdp2	1.23644	0.84312	3.62747	0.00152905	0.0209077	-1.12264	Jdp2	81703	ENSMUSG00000034271
ENSMUSG00000052160_Pld4	1.40173	4.29737	3.87208	0.000849634	0.0147334	-1.12374	Pld4	104759	ENSMUSG00000052160
ENSMUSG00000035493_Tgfbi	0.909089	5.21224	3.90469	0.000785397	0.0142438	-1.13172	Tgfbi	21810	ENSMUSG00000035493
ENSMUSG00000027342_Pcna	0.739391	4.94023	3.89589	0.000802242	0.0143239	-1.13641	Pcna	18538	ENSMUSG00000027342
ENSMUSG00000111394_Gm49759	3.06845	-2.25654	3.7075	0.00126223	0.0184685	-1.1381	NA	NA	ENSMUSG00000111394
ENSMUSG00000020227_Irak3	1.83848	0.698796	3.62017	0.00155601	0.021095	-1.14607	Irak3	73914	ENSMUSG00000020227
ENSMUSG00000002307_Daxx	0.473653	3.52341	3.82567	0.000950133	0.015814	-1.14627	Daxx	13163	ENSMUSG00000002307
ENSMUSG00000040127_Sdr9c7	-0.869901	5.51691	-3.91039	0.000774676	0.0141885	-1.14648	Sdr9c7	70061	ENSMUSG00000040127
ENSMUSG00000025790_Slco3a1	0.792003	2.25857	3.72293	0.00121633	0.0180209	-1.14978	Slco3a1	108116	ENSMUSG00000025790
ENSMUSG00000030884_Uqcrc2	-0.375712	7.55851	-3.89621	0.000801627	0.0143239	-1.15176	Uqcrc2	67003	ENSMUSG00000030884
ENSMUSG00000038352_Arl5c	2.08881	-1.34415	3.57307	0.00174143	0.0225937	-1.15531	Arl5c	217151	ENSMUSG00000038352
ENSMUSG00000024542_Cep192	1.19976	1.48551	3.65757	0.00142276	0.0199273	-1.1572	Cep192	70799	ENSMUSG00000024542
ENSMUSG00000031262_Cenpi	2.40814	-1.4958	3.56678	0.00176778	0.0227478	-1.15808	Cenpi	102920	ENSMUSG00000031262
ENSMUSG00000041426_Hibch	-0.406701	5.93191	-3.90851	0.000778202	0.0142187	-1.15869	Hibch	227095	ENSMUSG00000041426
ENSMUSG00000066595_Flvcr1	0.89064	1.83305	3.6835	0.001337	0.0193224	-1.15975	Flvcr1	226844	ENSMUSG00000066595
ENSMUSG00000024118_Tedc2	-0.849241	5.29524	-3.89986	0.000794592	0.0143143	-1.1612	Tedc2	72016	ENSMUSG00000024118
ENSMUSG00000002105_Slc39a13	0.505912	3.14228	3.78909	0.00103754	0.0164066	-1.16136	Slc39a13	68427	ENSMUSG00000002105
ENSMUSG00000022969_Il10rb	0.721066	3.23553	3.79489	0.00102318	0.0163601	-1.16602	Il10rb	16155	ENSMUSG00000022969
ENSMUSG00000024677_Ms4a6b	1.67973	1.61228	3.65992	0.00141476	0.0198696	-1.16604	Ms4a6b	69774	ENSMUSG00000024677
ENSMUSG00000015143_Actn1	0.893995	4.69553	3.87483	0.000844016	0.0147293	-1.16642	Actn1	109711	ENSMUSG00000015143
ENSMUSG00000045932_Ifit2	1.17713	2.60911	3.74397	0.00115641	0.0175755	-1.16756	Ifit2	15958	ENSMUSG00000045932
ENSMUSG00000026189_Pecr	-0.478029	7.69246	-3.8865	0.000820617	0.0145564	-1.16964	Pecr	111175	ENSMUSG00000026189
ENSMUSG00000056708_Ier5	0.786686	3.09106	3.78042	0.00105941	0.0165842	-1.17238	Ier5	15939	ENSMUSG00000056708
ENSMUSG00000043336_Filip1l	1.26546	2.74301	3.75095	0.00113717	0.0173284	-1.17276	Filip1l	78749	ENSMUSG00000043336
ENSMUSG00000063234_Gpr84	1.76201	-0.991603	3.55909	0.00180049	0.0229313	-1.17325	Gpr84	80910	ENSMUSG00000063234
ENSMUSG00000034023_Fancd2	2.04819	-0.891103	3.55617	0.00181309	0.0229811	-1.17328	Fancd2	211651	ENSMUSG00000034023
ENSMUSG00000116718_Gm49668	-1.21114	0.448818	-3.58694	0.00168467	0.0220694	-1.17408	NA	NA	ENSMUSG00000116718
ENSMUSG00000034673_Pbx2	0.325799	4.05933	3.84648	0.000903676	0.0153364	-1.1768	Pbx2	18515	ENSMUSG00000034673
ENSMUSG00000000028_Cdc45	1.50228	0.742118	3.59258	0.00166211	0.0218948	-1.1786	Cdc45	12544	ENSMUSG00000000028
ENSMUSG00000019214_Chtf18	2.41474	-0.992311	3.55121	0.00183467	0.0231326	-1.18124	Chtf18	214901	ENSMUSG00000019214
ENSMUSG00000059208_Hnrnpm	0.382119	6.11123	3.8986	0.000797021	0.0143143	-1.18136	Hnrnpm	76936	ENSMUSG00000059208
ENSMUSG00000058818_Pirb	1.46436	2.97343	3.76373	0.00110278	0.0169879	-1.19011	Pirb	18733	ENSMUSG00000058818
ENSMUSG00000068335_Dok1	1.4811	1.36283	3.63072	0.00151721	0.0208272	-1.19076	Dok1	13448	ENSMUSG00000068335
ENSMUSG00000097730_Gm26588	-1.06565	1.58446	-3.65112	0.00144489	0.0202051	-1.19199	NA	NA	ENSMUSG00000097730
ENSMUSG00000023909_Paqr4	0.994273	1.11633	3.61383	0.00157979	0.0211347	-1.19365	Paqr4	76498	ENSMUSG00000023909
ENSMUSG00000039747_Orai2	1.08332	0.563343	3.58211	0.00170421	0.0222417	-1.19482	Orai2	269717	ENSMUSG00000039747
ENSMUSG00000034993_Vat1	0.656975	5.01088	3.87624	0.000841168	0.0147006	-1.19519	Vat1	26949	ENSMUSG00000034993
ENSMUSG00000028678_Kif2c	2.60714	-0.195669	3.55815	0.00180455	0.0229313	-1.19655	Kif2c	73804	ENSMUSG00000028678
ENSMUSG00000019961_Tmpo	0.553612	5.26526	3.88037	0.00083283	0.0146526	-1.20081	Tmpo	21917	ENSMUSG00000019961
ENSMUSG00000032020_Ubash3b	1.78174	0.83338	3.58248	0.00170271	0.0222417	-1.20386	Ubash3b	72828	ENSMUSG00000032020
ENSMUSG00000112774_Gm36041	-0.774202	1.72317	-3.66019	0.00141383	0.0198696	-1.20415	NA	NA	ENSMUSG00000112774
ENSMUSG00000083161_Gm11427	1.87212	-1.36428	3.56258	0.0017856	0.0228702	-1.20444	NA	NA	ENSMUSG00000083161
ENSMUSG00000090272_Mndal	0.977482	2.83856	3.74184	0.00116232	0.0176139	-1.20956	Mndal	100040462	ENSMUSG00000090272
ENSMUSG00000047180_Neurl3	1.00317	3.52143	3.7947	0.00102364	0.0163601	-1.21024	Neurl3	214854	ENSMUSG00000047180
ENSMUSG00000039109_F13a1	2.27193	-0.971001	3.53863	0.00189059	0.0236026	-1.21623	F13a1	74145	ENSMUSG00000039109
ENSMUSG00000024044_Epb41l3	1.6221	1.81761	3.6586	0.00141922	0.0199106	-1.21744	Epb41l3	13823	ENSMUSG00000024044
ENSMUSG00000066861_Oas1g	1.22757	1.55574	3.63542	0.00150023	0.0207191	-1.219	Oas1g	23960	ENSMUSG00000066861
ENSMUSG00000020486_Septin4	-0.479736	3.1198	-3.76353	0.00110332	0.0169879	-1.22052	Septin4	18952	ENSMUSG00000020486
ENSMUSG00000079017_Ifi27l2a	1.43812	3.89459	3.80346	0.0010023	0.0161988	-1.22393	Ifi27l2a	76933	ENSMUSG00000079017
ENSMUSG00000027955_Gask1b	1.30155	-0.290471	3.53214	0.00192004	0.0237266	-1.22503	Gask1b	68659	ENSMUSG00000027955
ENSMUSG00000022033_Pbk	2.25212	0.10091	3.55855	0.00180282	0.0229313	-1.23182	Pbk	52033	ENSMUSG00000022033
ENSMUSG00000064043_Trerf1	1.21367	-0.522904	3.52507	0.00195268	0.0239443	-1.23455	Trerf1	224829	ENSMUSG00000064043
ENSMUSG00000087006_Gm13889	0.69823	2.22937	3.6817	0.0013428	0.0193629	-1.23458	Gm13889	620695	ENSMUSG00000087006
ENSMUSG00000035725_Prkx	0.70763	2.02621	3.66739	0.00138965	0.0197743	-1.23545	Prkx	19108	ENSMUSG00000035725
ENSMUSG00000028873_Cdca8	1.80601	1.17956	3.6066	0.00160732	0.0214127	-1.23614	Cdca8	52276	ENSMUSG00000028873
ENSMUSG00000024381_Bin1	0.4015	4.16953	3.82468	0.00095238	0.015831	-1.2372	Bin1	30948	ENSMUSG00000024381
ENSMUSG00000025993_Slc40a1	0.934505	7.30215	3.86292	0.000868595	0.0149025	-1.23911	Slc40a1	53945	ENSMUSG00000025993
ENSMUSG00000070354_Evi2	1.73183	-0.75246	3.52245	0.00196492	0.0240716	-1.23917	Evi2	101488212	ENSMUSG00000070354
ENSMUSG00000028268_Gbp3	1.5481	3.68206	3.78736	0.00104186	0.0164125	-1.23998	Gbp3	55932	ENSMUSG00000028268
ENSMUSG00000039055_Eme1	2.51655	-1.79465	3.55553	0.00181589	0.0229811	-1.24079	Eme1	268465	ENSMUSG00000039055
ENSMUSG00000038679_Trps1	1.53202	-0.472239	3.5196	0.00197832	0.0241672	-1.24728	Trps1	83925	ENSMUSG00000038679
ENSMUSG00000020901_Pik3r5	1.92067	0.60074	3.57034	0.0017528	0.0226502	-1.24949	Pik3r5	320207	ENSMUSG00000020901
ENSMUSG00000032739_Pram1	1.63307	0.340937	3.54288	0.00187153	0.0234418	-1.24969	Pram1	378460	ENSMUSG00000032739
ENSMUSG00000035948_Acss3	-0.809586	4.13871	-3.82077	0.000961396	0.0158614	-1.25108	Acss3	380660	ENSMUSG00000035948
ENSMUSG00000105373_Gm42429	-1.52803	3.33642	-3.76768	0.00109237	0.0168796	-1.25627	NA	NA	ENSMUSG00000105373
ENSMUSG00000043300_B3galnt1	1.53701	0.225876	3.53294	0.0019164	0.0237242	-1.25629	B3galnt1	26879	ENSMUSG00000043300
ENSMUSG00000053977_Cd8a	2.00061	-1.15739	3.51699	0.00199066	0.0242086	-1.26197	Cd8a	12525	ENSMUSG00000053977
ENSMUSG00000050107_Haspin	2.32958	-0.907484	3.51045	0.00202189	0.0244362	-1.26851	Haspin	14841	ENSMUSG00000050107
ENSMUSG00000024063_Lbh	0.797939	3.71145	3.78001	0.00106045	0.0165842	-1.27308	Lbh	77889	ENSMUSG00000024063
ENSMUSG00000069892_9930111J21Rik2	1.15038	1.80352	3.64191	0.00147711	0.0205446	-1.27366	9930111J21Rik2	245240	ENSMUSG00000069892
ENSMUSG00000001270_Ckb	1.47382	4.10867	3.79574	0.00102108	0.0163601	-1.27459	Ckb	12709	ENSMUSG00000001270
ENSMUSG00000034266_Batf	1.67343	-0.0567176	3.51871	0.00198252	0.024173	-1.27505	Batf	53314	ENSMUSG00000034266
ENSMUSG00000054293_P2ry10b	1.65786	-0.39732	3.50751	0.00203611	0.024549	-1.27726	P2ry10b	213438	ENSMUSG00000054293
ENSMUSG00000001444_Tbx21	1.55099	-0.985827	3.50322	0.002057	0.0247089	-1.27856	Tbx21	57765	ENSMUSG00000001444
ENSMUSG00000022489_Pde1b	1.72344	-0.454147	3.49981	0.00207379	0.0247999	-1.28891	Pde1b	18574	ENSMUSG00000022489
ENSMUSG00000028444_Cntfr	-1.54749	0.0589829	-3.51023	0.00202298	0.0244362	-1.29073	Cntfr	12804	ENSMUSG00000028444
ENSMUSG00000002550_Uck1	-0.530197	5.21479	-3.83885	0.000920446	0.0155396	-1.30373	Uck1	22245	ENSMUSG00000002550
ENSMUSG00000032508_Myd88	0.473483	4.05832	3.79276	0.00102843	0.0163601	-1.30462	Myd88	17874	ENSMUSG00000032508
ENSMUSG00000066235_Pomgnt2	-0.672281	1.72532	-3.61521	0.00157458	0.0211347	-1.30623	Pomgnt2	215494	ENSMUSG00000066235
ENSMUSG00000028337_Coro2a	1.99061	1.01815	3.54494	0.00186234	0.0233676	-1.30928	Coro2a	107684	ENSMUSG00000028337
ENSMUSG00000114608_Gm36161	2.49552	-1.19905	3.48685	0.00213873	0.0253844	-1.31208	NA	NA	ENSMUSG00000114608
ENSMUSG00000020737_Jpt1	0.851928	4.44066	3.80316	0.00100301	0.0161988	-1.31245	Jpt1	15374	ENSMUSG00000020737
ENSMUSG00000056698_Elmod3	-0.468688	3.50668	-3.75169	0.00113516	0.0173284	-1.32849	Elmod3	232089	ENSMUSG00000056698
ENSMUSG00000038642_Ctss	1.32598	6.30377	3.82791	0.000945015	0.0157693	-1.33078	Ctss	13040	ENSMUSG00000038642
ENSMUSG00000006585_Cdt1	1.60863	1.85484	3.60066	0.00163034	0.021573	-1.33958	Cdt1	67177	ENSMUSG00000006585
ENSMUSG00000021069_Pygl	-0.434607	9.14017	-3.78831	0.00103951	0.0164066	-1.33986	Pygl	110095	ENSMUSG00000021069
ENSMUSG00000001403_Ube2c	2.29676	1.62127	3.60307	0.00162094	0.0215278	-1.34518	Ube2c	68612	ENSMUSG00000001403
ENSMUSG00000037860_Aim2	1.66317	0.262026	3.48642	0.0021409	0.0253869	-1.35034	Aim2	383619	ENSMUSG00000037860
ENSMUSG00000039236_Isg20	0.838281	1.55198	3.57194	0.00174611	0.0226103	-1.35148	Isg20	57444	ENSMUSG00000039236
ENSMUSG00000069833_Ahnak	0.556304	3.7568	3.75084	0.00113747	0.0173284	-1.3568	Ahnak	66395	ENSMUSG00000069833
ENSMUSG00000017309_Cd300lg	-1.15174	3.54748	-3.72839	0.0012005	0.0178837	-1.36408	Cd300lg	52685	ENSMUSG00000017309
ENSMUSG00000009566_Fpgs	-0.463536	7.10129	-3.81233	0.000981128	0.0159961	-1.36413	Fpgs	14287	ENSMUSG00000009566
ENSMUSG00000030742_Lat	1.89182	-0.721632	3.46039	0.00227758	0.0263324	-1.3668	Lat	16797	ENSMUSG00000030742
ENSMUSG00000008318_Relt	1.91484	-0.600718	3.45879	0.00228624	0.026362	-1.37478	Relt	320100	ENSMUSG00000008318
ENSMUSG00000078439_Smim24	1.35478	-0.254283	3.4612	0.00227323	0.0263057	-1.37909	Smim24	72273	ENSMUSG00000078439
ENSMUSG00000036905_C1qb	1.21761	6.88065	3.8049	0.000998829	0.0161988	-1.38026	C1qb	12260	ENSMUSG00000036905
ENSMUSG00000024885_Aldh3b1	1.35058	2.48997	3.63669	0.0014957	0.0206921	-1.38081	Aldh3b1	67689	ENSMUSG00000024885
ENSMUSG00000041607_Mbp	1.24164	0.167399	3.47071	0.00222239	0.026064	-1.383	Mbp	17196	ENSMUSG00000041607
ENSMUSG00000026627_Pacc1	0.966594	1.3047	3.54681	0.00185404	0.0233076	-1.38315	Pacc1	66950	ENSMUSG00000026627
ENSMUSG00000003541_Ier3	1.46796	0.0738987	3.46506	0.00225245	0.0262332	-1.38454	Ier3	15937	ENSMUSG00000003541
ENSMUSG00000022822_Abcc5	1.1324	1.66992	3.56995	0.00175443	0.0226502	-1.38606	Abcc5	27416	ENSMUSG00000022822
ENSMUSG00000027712_Anxa5	0.546952	6.58006	3.80729	0.000993093	0.016135	-1.3895	Anxa5	11747	ENSMUSG00000027712
ENSMUSG00000096210_H1f0	-0.33254	6.8602	-3.80416	0.00100061	0.0161988	-1.39099	H1f0	14958	ENSMUSG00000096210
ENSMUSG00000029322_Plac8	1.7204	3.67359	3.71751	0.00123225	0.018153	-1.39427	Plac8	231507	ENSMUSG00000029322
ENSMUSG00000053819_Camk2d	0.871488	2.5844	3.64046	0.00148226	0.0205722	-1.40194	Camk2d	108058	ENSMUSG00000053819
ENSMUSG00000049037_Clec4a1	1.62237	2.40855	3.63515	0.00150122	0.0207191	-1.40223	Clec4a1	269799	ENSMUSG00000049037
ENSMUSG00000038173_Enpp6	-1.01781	0.722476	-3.49853	0.00208009	0.0248021	-1.4065	Enpp6	320981	ENSMUSG00000038173
ENSMUSG00000022014_Epsti1	1.32488	2.19751	3.60603	0.00160954	0.0214203	-1.41327	Epsti1	108670	ENSMUSG00000022014
ENSMUSG00000032586_Traip	2.17986	-1.45146	3.44701	0.00235115	0.0268522	-1.41566	Traip	22036	ENSMUSG00000032586
ENSMUSG00000027323_Rad51	2.22652	0.379283	3.46584	0.00224831	0.0262332	-1.41725	Rad51	19361	ENSMUSG00000027323
ENSMUSG00000092545_Gm20319	-0.407882	5.18047	-3.78871	0.0010385	0.0164066	-1.42122	Gm20319	100504628	ENSMUSG00000092545
ENSMUSG00000017861_Mybl2	2.55281	-1.25462	3.43989	0.0023912	0.0271195	-1.42466	Mybl2	17865	ENSMUSG00000017861
ENSMUSG00000027018_Hat1	0.769834	3.26778	3.67933	0.00135047	0.019419	-1.42716	Hat1	107435	ENSMUSG00000027018
ENSMUSG00000015950_Ncf1	1.26015	3.02516	3.66275	0.00140521	0.0198214	-1.43153	Ncf1	17969	ENSMUSG00000015950
ENSMUSG00000032826_Ank2	1.17807	0.852226	3.48423	0.0021521	0.025473	-1.43269	Ank2	109676	ENSMUSG00000032826
ENSMUSG00000035711_Dok3	1.26016	1.38505	3.52805	0.00193888	0.0238203	-1.43537	Dok3	27261	ENSMUSG00000035711
ENSMUSG00000034247_Plekhm1	0.636492	4.44029	3.75482	0.00112664	0.0172977	-1.43539	Plekhm1	353047	ENSMUSG00000034247
ENSMUSG00000031904_Slc7a6	1.71885	-1.57515	3.44693	0.00235157	0.0268522	-1.43699	Slc7a6	330836	ENSMUSG00000031904
ENSMUSG00000042129_Rassf4	1.59396	3.14548	3.66838	0.00138635	0.0197708	-1.4401	Rassf4	213391	ENSMUSG00000042129
ENSMUSG00000022126_Acod1	3.50758	-1.1933	3.42064	0.00250294	0.0279401	-1.44692	Acod1	16365	ENSMUSG00000022126
ENSMUSG00000028600_Podn	-0.945434	0.968773	-3.49223	0.00211155	0.0251078	-1.44765	Podn	242608	ENSMUSG00000028600
ENSMUSG00000039763_Dnajc28	-0.442208	2.97412	-3.66103	0.00141101	0.0198599	-1.45253	Dnajc28	246738	ENSMUSG00000039763
ENSMUSG00000058835_Abi1	0.411597	5.02352	3.77037	0.00108531	0.0168509	-1.45297	Abi1	11308	ENSMUSG00000058835
ENSMUSG00000027381_Bcl2l11	0.747052	2.15711	3.58109	0.00170837	0.0222552	-1.45654	Bcl2l11	12125	ENSMUSG00000027381
ENSMUSG00000050370_Ch25h	5.17704	-3.07095	3.60488	0.00161396	0.0214571	-1.46432	Ch25h	12642	ENSMUSG00000050370
ENSMUSG00000022673_Mcm4	1.3946	2.50076	3.598	0.00164074	0.0216575	-1.46865	Mcm4	17217	ENSMUSG00000022673
ENSMUSG00000021298_Gpr132	1.46903	-1.00978	3.40905	0.00257265	0.0284486	-1.47154	Gpr132	56696	ENSMUSG00000021298
ENSMUSG00000032470_Mras	-0.945531	1.70883	-3.53599	0.00190252	0.0236427	-1.47314	Mras	17532	ENSMUSG00000032470
ENSMUSG00000052270_Fpr2	1.74883	1.15489	3.49677	0.00208885	0.0248836	-1.47417	Fpr2	14289	ENSMUSG00000052270
ENSMUSG00000025888_Casp1	1.39564	2.00849	3.55954	0.00179858	0.0229313	-1.47429	Casp1	12362	ENSMUSG00000025888
ENSMUSG00000029570_Lfng	1.45978	2.46757	3.59535	0.00165116	0.0217728	-1.47726	Lfng	16848	ENSMUSG00000029570
ENSMUSG00000030579_Tyrobp	1.25737	4.71659	3.73961	0.00116857	0.0176721	-1.47966	Tyrobp	22177	ENSMUSG00000030579
ENSMUSG00000025165_Sectm1a	1.64057	0.289539	3.42965	0.00245004	0.027532	-1.48137	Sectm1a	209588	ENSMUSG00000025165
ENSMUSG00000034744_Nagk	0.490785	3.76932	3.69643	0.00129619	0.0188165	-1.48164	Nagk	56174	ENSMUSG00000034744
ENSMUSG00000026768_Itga8	-0.937638	2.18316	-3.57267	0.00174308	0.0225937	-1.48689	Itga8	241226	ENSMUSG00000026768
ENSMUSG00000022103_Gfra2	1.85426	1.09103	3.49896	0.00207799	0.0247999	-1.48707	Gfra2	14586	ENSMUSG00000022103
ENSMUSG00000043008_Klhl6	1.02163	1.69731	3.53007	0.00192955	0.0237959	-1.48818	Klhl6	239743	ENSMUSG00000043008
ENSMUSG00000026573_Xcl1	1.70015	-1.56542	3.40723	0.00258381	0.0285258	-1.49464	Xcl1	16963	ENSMUSG00000026573
ENSMUSG00000030677_Kif22	2.17149	0.813255	3.46462	0.00225481	0.0262332	-1.49716	Kif22	110033	ENSMUSG00000030677
ENSMUSG00000021608_Lpcat1	1.2103	1.78864	3.52843	0.00193709	0.0238203	-1.49931	Lpcat1	210992	ENSMUSG00000021608
ENSMUSG00000019139_Isyna1	0.857212	3.45647	3.66339	0.00140305	0.0198126	-1.50162	Isyna1	71780	ENSMUSG00000019139
ENSMUSG00000018983_E2f2	1.31188	1.23443	3.47436	0.00220321	0.0259358	-1.50567	E2f2	242705	ENSMUSG00000018983
ENSMUSG00000034311_Kif4	2.27278	-0.215893	3.41578	0.00253193	0.0281424	-1.5063	Kif4	16571	ENSMUSG00000034311
ENSMUSG00000043099_Hic1	0.860714	2.27392	3.57034	0.00175279	0.0226502	-1.50871	Hic1	15248	ENSMUSG00000043099
ENSMUSG00000003721_Insig2	-0.6114	7.98201	-3.73638	0.00117767	0.0177528	-1.51146	Insig2	72999	ENSMUSG00000003721
ENSMUSG00000031824_6430548M08Rik	1.17756	3.04461	3.62301	0.00154547	0.0210656	-1.51296	6430548M08Rik	234797	ENSMUSG00000031824
ENSMUSG00000059498_Fcgr3	1.12737	3.71838	3.67754	0.00135626	0.0194488	-1.51327	Fcgr3	14131	ENSMUSG00000059498
ENSMUSG00000069917_Hba-a2	2.30162	5.83992	3.7416	0.00116302	0.0176139	-1.51431	Hba-a2	110257	ENSMUSG00000069917
ENSMUSG00000028978_Nos3	1.19246	1.73412	3.51452	0.00200238	0.0242779	-1.51699	Nos3	18127	ENSMUSG00000028978
ENSMUSG00000070639_Lrrc8b	1.22115	0.279078	3.41203	0.00255458	0.0282729	-1.52745	Lrrc8b	433926	ENSMUSG00000070639
ENSMUSG00000014444_Piezo1	1.09655	2.45236	3.56913	0.00175786	0.0226539	-1.52898	Piezo1	234839	ENSMUSG00000014444
ENSMUSG00000027544_Nfatc2	1.85654	-1.08855	3.38132	0.00274728	0.0297944	-1.53051	Nfatc2	18019	ENSMUSG00000027544
ENSMUSG00000039748_Exo1	3.14161	-1.85523	3.40353	0.00260651	0.028676	-1.53055	Exo1	26909	ENSMUSG00000039748
ENSMUSG00000053898_Ech1	-0.5321	7.78116	-3.73091	0.00119324	0.0178785	-1.53159	Ech1	51798	ENSMUSG00000053898
ENSMUSG00000057143_Trim12c	0.55557	3.8278	3.68248	0.00134029	0.0193482	-1.53287	Trim12c	319236	ENSMUSG00000057143
ENSMUSG00000029174_Tbc1d1	0.96629	3.02167	3.61554	0.00157333	0.0211347	-1.53372	Tbc1d1	57915	ENSMUSG00000029174
ENSMUSG00000117079_Gm41611	1.66812	-1.2002	3.37723	0.00277397	0.0299834	-1.53731	Gm41611	105246309	ENSMUSG00000117079
ENSMUSG00000022129_Dct	-1.35699	1.635	-3.50507	0.00204798	0.0246232	-1.54026	Dct	13190	ENSMUSG00000022129
ENSMUSG00000039653_Baat	-0.457065	7.92708	-3.72466	0.00121128	0.0179873	-1.54089	Baat	12012	ENSMUSG00000039653
ENSMUSG00000027611_Procr	2.12054	0.999405	3.45079	0.00233014	0.0267082	-1.54381	Procr	19124	ENSMUSG00000027611
ENSMUSG00000024659_Anxa1	0.974779	2.23016	3.55005	0.00183978	0.0231744	-1.54416	Anxa1	16952	ENSMUSG00000024659
ENSMUSG00000027984_Hadh	-0.338895	7.78145	-3.72564	0.00120845	0.0179658	-1.54579	Hadh	15107	ENSMUSG00000027984
ENSMUSG00000020974_Pole2	1.97829	-0.773425	3.37102	0.00281505	0.0302006	-1.54763	Pole2	18974	ENSMUSG00000020974
ENSMUSG00000024910_Ctsw	1.63813	-0.386549	3.37481	0.00278992	0.0300055	-1.5506	Ctsw	13041	ENSMUSG00000024910
ENSMUSG00000035566_Pcdh17	1.24692	0.706668	3.42868	0.00245566	0.027532	-1.55082	Pcdh17	219228	ENSMUSG00000035566
ENSMUSG00000049404_Rarres1	-1.10486	6.28094	-3.73925	0.00116959	0.0176721	-1.5529	Rarres1	109222	ENSMUSG00000049404
ENSMUSG00000031506_Ptpn7	1.74551	-0.319733	3.38034	0.00275366	0.0298136	-1.55503	Ptpn7	320139	ENSMUSG00000031506
ENSMUSG00000046805_Mpeg1	1.27962	6.95164	3.72945	0.00119745	0.0178785	-1.55541	Mpeg1	17476	ENSMUSG00000046805
ENSMUSG00000039232_Stx11	1.56277	0.57842	3.4173	0.00252287	0.02809	-1.55721	Stx11	74732	ENSMUSG00000039232
ENSMUSG00000017561_Crlf3	0.579744	2.90907	3.60104	0.00162883	0.021573	-1.55749	Crlf3	54394	ENSMUSG00000017561
ENSMUSG00000030782_Tgfb1i1	0.915714	1.06497	3.44086	0.00238571	0.0271001	-1.55804	Tgfb1i1	21804	ENSMUSG00000030782
ENSMUSG00000036046_5031439G07Rik	0.7208	5.30332	3.72914	0.00119833	0.0178785	-1.56004	5031439G07Rik	223739	ENSMUSG00000036046
ENSMUSG00000040212_Emp3	1.30483	1.77639	3.49915	0.00207704	0.0247999	-1.56077	Emp3	13732	ENSMUSG00000040212
ENSMUSG00000041650_Pcca	-0.330013	6.0652	-3.73684	0.00117639	0.0177528	-1.56405	Pcca	110821	ENSMUSG00000041650
ENSMUSG00000061665_Cd2ap	0.477127	4.9692	3.71987	0.00122529	0.0180915	-1.56653	Cd2ap	12488	ENSMUSG00000061665
ENSMUSG00000036908_Unc93b1	0.828066	5.56976	3.72911	0.00119843	0.0178785	-1.56707	Unc93b1	54445	ENSMUSG00000036908
ENSMUSG00000048922_Cdca2	2.30467	-0.355014	3.3852	0.00272219	0.0295967	-1.56944	Cdca2	108912	ENSMUSG00000048922
ENSMUSG00000068227_Il2rb	1.29617	2.16739	3.53831	0.001892	0.0236026	-1.57052	Il2rb	16185	ENSMUSG00000068227
ENSMUSG00000025731_Mettl26	-0.523161	6.79394	-3.72803	0.00120154	0.0178837	-1.57184	Mettl26	68347	ENSMUSG00000025731
ENSMUSG00000021994_Wnt5a	-1.18299	-0.239919	-3.36331	0.00286684	0.0306098	-1.57759	Wnt5a	22418	ENSMUSG00000021994
ENSMUSG00000013698_Pea15a	0.566359	4.71918	3.70448	0.00127139	0.0185815	-1.57833	Pea15a	18611	ENSMUSG00000013698
ENSMUSG00000026126_Ptpn18	1.3358	2.35465	3.54011	0.00188393	0.0235473	-1.57901	Ptpn18	19253	ENSMUSG00000026126
ENSMUSG00000026657_Frmd4a	1.11714	2.64724	3.55827	0.00180404	0.0229313	-1.5924	Frmd4a	209630	ENSMUSG00000026657
ENSMUSG00000006304_Arpc2	0.47797	6.58147	3.72145	0.00122067	0.0180645	-1.59305	Arpc2	76709	ENSMUSG00000006304
ENSMUSG00000032997_Chpf	0.752708	1.62341	3.47467	0.00220157	0.0259358	-1.59396	Chpf	74241	ENSMUSG00000032997
ENSMUSG00000046032_Snx12	0.425065	3.36174	3.61883	0.001561	0.0210995	-1.59769	Snx12	55988	ENSMUSG00000046032
ENSMUSG00000031015_Swap70	0.671605	2.9032	3.57865	0.00171837	0.0223405	-1.60511	Swap70	20947	ENSMUSG00000031015
ENSMUSG00000023940_Sgo1	2.17581	-1.65916	3.34303	0.00300749	0.0314318	-1.6064	Sgo1	72415	ENSMUSG00000023940
ENSMUSG00000057729_Prtn3	2.11967	1.15618	3.41814	0.00251784	0.0280823	-1.60663	Prtn3	19152	ENSMUSG00000057729
ENSMUSG00000022964_Tmem50b	0.676795	2.42852	3.53699	0.00189798	0.0236317	-1.6073	Tmem50b	77975	ENSMUSG00000022964
ENSMUSG00000031367_Ap1s2	1.21544	2.09095	3.5103	0.00202263	0.0244362	-1.60803	Ap1s2	108012	ENSMUSG00000031367
ENSMUSG00000026249_Serpine2	-1.07917	1.22408	-3.44565	0.00235872	0.0268865	-1.61108	Serpine2	20720	ENSMUSG00000026249
ENSMUSG00000053716_Dusp7	0.926199	2.02584	3.50104	0.00206773	0.0247917	-1.61298	Dusp7	235584	ENSMUSG00000053716
ENSMUSG00000033450_Tagap	1.3447	-0.112304	3.35726	0.00290812	0.0307763	-1.61426	Tagap	72536	ENSMUSG00000033450
ENSMUSG00000058135_Gstm1	0.851562	11.0348	3.63474	0.0015027	0.0207191	-1.62168	Gstm1	14862	ENSMUSG00000058135
ENSMUSG00000045382_Cxcr4	1.68536	-0.322763	3.33705	0.00305026	0.0317221	-1.62588	Cxcr4	12767	ENSMUSG00000045382
ENSMUSG00000013707_Tnfaip8l2	1.2385	1.67251	3.47	0.00222618	0.026064	-1.62634	Tnfaip8l2	69769	ENSMUSG00000013707
ENSMUSG00000038387_Rras	0.447869	4.94224	3.6912	0.00131255	0.0190115	-1.62663	Rras	20130	ENSMUSG00000038387
ENSMUSG00000018169_Mfng	0.936596	0.402291	3.37554	0.00278511	0.0300049	-1.62917	Mfng	17305	ENSMUSG00000018169
ENSMUSG00000038591_Colec10	-0.78592	4.45432	-3.67024	0.00138021	0.0197049	-1.63705	Colec10	239447	ENSMUSG00000038591
ENSMUSG00000026873_Phf19	1.37296	-0.153348	3.33715	0.00304958	0.0317221	-1.63812	Phf19	74016	ENSMUSG00000026873
ENSMUSG00000031700_Gpt2	-0.389539	8.06052	-3.68045	0.00134683	0.0193994	-1.64013	Gpt2	108682	ENSMUSG00000031700
ENSMUSG00000028923_Necap2	0.717799	3.24877	3.59111	0.00166798	0.0219499	-1.64045	Necap2	66147	ENSMUSG00000028923
ENSMUSG00000032849_Abcc4	0.903505	1.38331	3.43772	0.00240356	0.0272298	-1.64441	Abcc4	239273	ENSMUSG00000032849
ENSMUSG00000038534_Osbpl7	0.85932	0.683523	3.37612	0.00278125	0.0300049	-1.64622	Osbpl7	71240	ENSMUSG00000038534
ENSMUSG00000073491_Ifi213	1.32077	0.395066	3.35639	0.00291412	0.0307763	-1.6507	Ifi213	623121	ENSMUSG00000073491
ENSMUSG00000045404_Kcnk13	1.59572	0.363153	3.35887	0.00289705	0.0307743	-1.65084	Kcnk13	217826	ENSMUSG00000045404
ENSMUSG00000019851_Perp	-0.376893	6.46578	-3.69815	0.00129087	0.0187668	-1.65193	Perp	64058	ENSMUSG00000019851
ENSMUSG00000060981_H4c8	-1.19492	2.04239	-3.50788	0.00203433	0.024549	-1.65251	H4c8	69386	ENSMUSG00000060981
ENSMUSG00000034675_Dbn1	0.930869	1.19359	3.41367	0.00254467	0.0281873	-1.65383	Dbn1	56320	ENSMUSG00000034675
ENSMUSG00000020641_Rsad2	0.834069	3.63069	3.61469	0.00157652	0.0211347	-1.66241	Rsad2	58185	ENSMUSG00000020641
ENSMUSG00000027907_S100a11	0.673117	2.99338	3.56168	0.00178941	0.0228963	-1.66405	S100a11	20195	ENSMUSG00000027907
ENSMUSG00000020740_Gga3	0.611699	2.44304	3.51066	0.00202087	0.0244362	-1.66519	Gga3	260302	ENSMUSG00000020740
ENSMUSG00000050592_Fam78a	1.22823	1.04534	3.39876	0.00263619	0.0288085	-1.66845	Fam78a	241303	ENSMUSG00000050592
ENSMUSG00000026972_Arrdc1	1.03154	1.36737	3.41643	0.00252807	0.0281237	-1.66925	Arrdc1	215705	ENSMUSG00000026972
ENSMUSG00000026458_Ppfia4	1.32827	1.33365	3.42922	0.00245254	0.027532	-1.66935	Ppfia4	68507	ENSMUSG00000026458
ENSMUSG00000048440_Cyp4f16	0.934782	1.9656	3.47219	0.00221459	0.0260354	-1.66998	Cyp4f16	70101	ENSMUSG00000048440
ENSMUSG00000002103_Acp2	0.40639	5.76129	3.68997	0.00131642	0.0190462	-1.67019	Acp2	11432	ENSMUSG00000002103
ENSMUSG00000090698_Apold1	1.28382	0.377976	3.34948	0.00296208	0.0310574	-1.67182	Apold1	381823	ENSMUSG00000090698
ENSMUSG00000028312_Smc2	1.46693	1.89552	3.45902	0.00228502	0.026362	-1.67288	Smc2	14211	ENSMUSG00000028312
ENSMUSG00000052298_Cdc42se2	0.6622	3.89736	3.62018	0.00155595	0.021095	-1.68201	Cdc42se2	72729	ENSMUSG00000052298
ENSMUSG00000003032_Klf4	1.38652	-0.0440296	3.32341	0.00315	0.0323725	-1.68285	Klf4	16600	ENSMUSG00000003032
ENSMUSG00000020101_Vsir	0.692046	3.42506	3.5879	0.0016808	0.0220513	-1.68357	Vsir	74048	ENSMUSG00000020101
ENSMUSG00000054693_Adam10	0.5805	4.92524	3.66482	0.00139825	0.0198096	-1.68834	Adam10	11487	ENSMUSG00000054693
ENSMUSG00000032528_Vipr1	-0.76273	4.87587	-3.66224	0.00140691	0.0198238	-1.69135	Vipr1	22354	ENSMUSG00000032528
ENSMUSG00000034792_Gna15	1.88212	-0.62367	3.30631	0.00327959	0.0331259	-1.69221	Gna15	14676	ENSMUSG00000034792
ENSMUSG00000054203_Ifi205	1.52916	1.25671	3.40504	0.00259723	0.0286226	-1.69258	Ifi205	226695	ENSMUSG00000054203
ENSMUSG00000029204_Rhoh	1.43288	0.22861	3.32899	0.00310884	0.0320668	-1.70233	Rhoh	74734	ENSMUSG00000029204
ENSMUSG00000000732_Icosl	1.2077	-0.0162844	3.31441	0.00321756	0.0328064	-1.70381	Icosl	50723	ENSMUSG00000000732
ENSMUSG00000003206_Ebi3	1.31556	0.579187	3.35642	0.00291388	0.0307763	-1.70657	Ebi3	50498	ENSMUSG00000003206
ENSMUSG00000118155_Gm50136	-1.23407	-0.634512	-3.3009	0.00332169	0.0334468	-1.70691	NA	NA	ENSMUSG00000118155
ENSMUSG00000024772_Ehd1	0.486663	5.64833	3.67261	0.00137237	0.019658	-1.70725	Ehd1	13660	ENSMUSG00000024772
ENSMUSG00000081534_Slc48a1	0.411628	5.69374	3.67102	0.00137762	0.0197049	-1.70832	Slc48a1	67739	ENSMUSG00000081534
ENSMUSG00000102095_C730036E19Rik	-1.19447	-0.257795	-3.30882	0.00326022	0.0330342	-1.7102	NA	NA	ENSMUSG00000102095
ENSMUSG00000115919_Gm31583	-1.21406	4.16064	-3.62903	0.00152336	0.020874	-1.71041	Gm31583	102633856	ENSMUSG00000115919
ENSMUSG00000019850_Tnfaip3	1.49329	1.95178	3.4534	0.00231574	0.0266074	-1.71631	Tnfaip3	21929	ENSMUSG00000019850
ENSMUSG00000028439_Fam219a	0.729222	2.33752	3.47758	0.00218638	0.0258081	-1.71888	Fam219a	71901	ENSMUSG00000028439
ENSMUSG00000035697_Arhgap45	0.83376	2.98435	3.53746	0.00189584	0.0236278	-1.71941	Arhgap45	70719	ENSMUSG00000035697
ENSMUSG00000038807_Rap1gap2	2.0837	0.331383	3.32194	0.00316099	0.0323827	-1.72315	Rap1gap2	380711	ENSMUSG00000038807
ENSMUSG00000040511_Pvr	0.684004	2.7518	3.51457	0.00200217	0.0242779	-1.72491	Pvr	52118	ENSMUSG00000040511
ENSMUSG00000031167_Rbm3	1.08275	4.98699	3.64529	0.00146521	0.0204216	-1.7251	Rbm3	19652	ENSMUSG00000031167
ENSMUSG00000052087_Rgs14	1.96739	-0.826952	3.28125	0.00347892	0.0346794	-1.72756	Rgs14	51791	ENSMUSG00000052087
ENSMUSG00000031584_Gsr	0.328524	6.22537	3.66626	0.00139342	0.0198044	-1.72799	Gsr	14782	ENSMUSG00000031584
ENSMUSG00000030232_Aebp2	0.351904	4.18788	3.61788	0.00156454	0.0211253	-1.73074	Aebp2	11569	ENSMUSG00000030232
ENSMUSG00000074802_Gas2l3	1.21027	1.03255	3.36462	0.00285794	0.0305594	-1.7319	Gas2l3	237436	ENSMUSG00000074802
ENSMUSG00000003546_Klc4	-0.322021	5.72679	-3.66355	0.00140251	0.0198126	-1.73323	Klc4	74764	ENSMUSG00000003546
ENSMUSG00000028149_Rap1gds1	0.399845	4.45477	3.6275	0.00152894	0.0209077	-1.73573	Rap1gds1	229877	ENSMUSG00000028149
ENSMUSG00000027994_Mcub	2.28049	-1.85522	3.29419	0.00337459	0.0339267	-1.73849	Mcub	66815	ENSMUSG00000027994
ENSMUSG00000041707_Tmem273	1.35461	0.213719	3.30848	0.00326284	0.0330342	-1.73864	Tmem273	69069	ENSMUSG00000041707
ENSMUSG00000021838_Samd4	0.899699	1.91851	3.42867	0.00245575	0.027532	-1.73925	Samd4	74480	ENSMUSG00000021838
ENSMUSG00000098188_Sowahc	0.752717	2.87603	3.51552	0.00199765	0.024266	-1.74094	Sowahc	268301	ENSMUSG00000098188
ENSMUSG00000031722_Hp	0.876409	12.2011	3.55479	0.00181911	0.0229811	-1.74359	Hp	15439	ENSMUSG00000031722
ENSMUSG00000027087_Itgav	0.494772	4.41337	3.62164	0.00155053	0.0210901	-1.7438	Itgav	16410	ENSMUSG00000027087
ENSMUSG00000036896_C1qc	1.0593	6.68472	3.65055	0.00144687	0.0202109	-1.74592	C1qc	12262	ENSMUSG00000036896
ENSMUSG00000021390_Ogn	-1.3162	0.0619993	-3.29273	0.00338618	0.0339605	-1.75323	Ogn	18295	ENSMUSG00000021390
ENSMUSG00000034459_Ifit1	0.697719	3.73592	3.58401	0.0016965	0.0221899	-1.75574	Ifit1	15957	ENSMUSG00000034459
ENSMUSG00000051378_Kif18b	2.33963	-1.37737	3.2655	0.00361015	0.035554	-1.75839	Kif18b	70218	ENSMUSG00000051378
ENSMUSG00000019966_Kitl	0.879702	1.43349	3.37929	0.0027605	0.0298627	-1.75931	Kitl	17311	ENSMUSG00000019966
ENSMUSG00000021036_Sptlc2	0.373942	4.55682	3.62009	0.00155632	0.021095	-1.76039	Sptlc2	20773	ENSMUSG00000021036
ENSMUSG00000030970_Ctbp2	1.22312	0.638632	3.32238	0.00315773	0.0323749	-1.76133	Ctbp2	13017	ENSMUSG00000030970
ENSMUSG00000001029_Icam2	1.21275	2.26438	3.44919	0.00233899	0.0267558	-1.76546	Icam2	15896	ENSMUSG00000001029
ENSMUSG00000039193_Nlrc4	1.49565	-0.555061	3.26443	0.00361918	0.0356116	-1.76855	Nlrc4	268973	ENSMUSG00000039193
ENSMUSG00000078970_Wdr92	-0.536037	3.19751	-3.53334	0.00191457	0.0237242	-1.76858	Wdr92	103784	ENSMUSG00000078970
ENSMUSG00000036655_Colec11	-0.400021	4.95362	-3.63204	0.00151243	0.0207902	-1.76967	Colec11	71693	ENSMUSG00000036655
ENSMUSG00000023021_Cers5	0.941752	1.2463	3.36695	0.00284225	0.0304167	-1.76984	Cers5	71949	ENSMUSG00000023021
ENSMUSG00000024399_Ltb	1.20256	0.872323	3.34084	0.00302314	0.0315445	-1.76986	Ltb	16994	ENSMUSG00000024399
ENSMUSG00000000957_Mmp14	0.458487	5.00469	3.63041	0.00151833	0.0208272	-1.77197	Mmp14	17387	ENSMUSG00000000957
ENSMUSG00000045917_Tmem268	0.848815	3.77362	3.56522	0.00177437	0.0227939	-1.77747	Tmem268	230279	ENSMUSG00000045917
ENSMUSG00000031775_Pllp	-0.716277	3.56516	-3.55498	0.00181826	0.0229811	-1.78219	Pllp	67801	ENSMUSG00000031775
ENSMUSG00000044703_Phf11a	1.83941	-0.639414	3.2584	0.00367083	0.0359015	-1.78244	Phf11a	219131	ENSMUSG00000044703
ENSMUSG00000035692_Isg15	0.779311	4.31603	3.5992	0.00163604	0.0216174	-1.78492	Isg15	100038882	ENSMUSG00000035692
ENSMUSG00000055653_Gpc3	-2.24846	-1.27332	-3.25182	0.003728	0.0363065	-1.78696	Gpc3	14734	ENSMUSG00000055653
ENSMUSG00000030340_Scnn1a	-0.49785	3.9602	-3.58061	0.00171033	0.0222583	-1.78965	Scnn1a	20276	ENSMUSG00000030340
ENSMUSG00000018381_Abi3	1.07085	3.64491	3.55336	0.0018253	0.0230369	-1.79092	Abi3	66610	ENSMUSG00000018381
ENSMUSG00000031527_Eri1	0.453135	3.4507	3.5428	0.00187187	0.0234418	-1.79093	Eri1	67276	ENSMUSG00000031527
ENSMUSG00000036067_Slc2a6	2.26134	-0.567888	3.25104	0.00373483	0.036308	-1.79175	Slc2a6	227659	ENSMUSG00000036067
ENSMUSG00000046295_Ankle1	2.39518	-2.07342	3.26612	0.0036049	0.0355521	-1.79544	Ankle1	234396	ENSMUSG00000046295
ENSMUSG00000042492_Tbc1d10b	0.616101	3.49208	3.54023	0.00188337	0.0235473	-1.79927	Tbc1d10b	68449	ENSMUSG00000042492
ENSMUSG00000039699_Batf2	1.57875	-0.57262	3.2531	0.00371684	0.036242	-1.79962	Batf2	74481	ENSMUSG00000039699
ENSMUSG00000005360_Slc1a3	1.85882	-1.18975	3.24341	0.00380237	0.036854	-1.80226	Slc1a3	20512	ENSMUSG00000005360
ENSMUSG00000022586_Ly6i	3.40571	-1.98914	3.26545	0.00361059	0.035554	-1.80519	Ly6i	57248	ENSMUSG00000022586
ENSMUSG00000011305_Plin5	-0.568584	5.25142	-3.62229	0.00154811	0.0210794	-1.8135	Plin5	66968	ENSMUSG00000011305
ENSMUSG00000059923_Grb2	0.414512	5.66828	3.62618	0.0015338	0.0209507	-1.81618	Grb2	14784	ENSMUSG00000059923
ENSMUSG00000026630_Batf3	1.92131	0.654045	3.30403	0.00329725	0.0332784	-1.81875	Batf3	381319	ENSMUSG00000026630
ENSMUSG00000022322_Shcbp1	2.20389	-0.142711	3.28125	0.00347886	0.0346794	-1.81928	Shcbp1	20419	ENSMUSG00000022322
ENSMUSG00000048498_Cd300e	2.03162	2.40953	3.45527	0.00230545	0.0265363	-1.81937	Cd300e	217306	ENSMUSG00000048498
ENSMUSG00000037062_Sh3glb1	0.37814	5.6956	3.62457	0.00153971	0.0210091	-1.82128	Sh3glb1	54673	ENSMUSG00000037062
ENSMUSG00000015854_Cd5l	1.75532	8.01891	3.60048	0.00163101	0.021573	-1.82242	Cd5l	11801	ENSMUSG00000015854
ENSMUSG00000054477_Kcnn2	-0.466585	3.99093	-3.56905	0.00175822	0.0226539	-1.82261	Kcnn2	140492	ENSMUSG00000054477
ENSMUSG00000038526_Car14	-0.779654	5.15022	-3.61416	0.00157853	0.0211347	-1.82425	Car14	23831	ENSMUSG00000038526
ENSMUSG00000040640_Erc2	-0.464357	2.58579	-3.45931	0.00228345	0.026362	-1.82443	Erc2	238988	ENSMUSG00000040640
ENSMUSG00000057406_Nsd2	0.627109	3.93448	3.55915	0.00180025	0.0229313	-1.82459	Nsd2	107823	ENSMUSG00000057406
ENSMUSG00000041498_Kif14	2.39407	-1.84049	3.23233	0.00390243	0.037408	-1.82605	Kif14	381293	ENSMUSG00000041498
ENSMUSG00000002944_Cd36	0.713304	5.35251	3.61294	0.00158315	0.0211561	-1.82616	Cd36	12491	ENSMUSG00000002944
ENSMUSG00000020572_Nampt	0.516753	5.53139	3.61926	0.00155938	0.0210995	-1.82851	Nampt	59027	ENSMUSG00000020572
ENSMUSG00000003585_Sec14l2	-0.364823	9.18852	-3.57298	0.00174178	0.0225937	-1.83637	Sec14l2	67815	ENSMUSG00000003585
ENSMUSG00000070348_Ccnd1	1.19789	5.48192	3.60684	0.00160642	0.0214127	-1.83642	Ccnd1	12443	ENSMUSG00000070348
ENSMUSG00000026064_Ptp4a1	-1.95853	0.162371	-3.25901	0.00366561	0.0358776	-1.83778	Ptp4a1	19243	ENSMUSG00000026064
ENSMUSG00000059689_Zfp637	-0.437274	3.60777	-3.53548	0.00190483	0.0236487	-1.84035	Zfp637	232337	ENSMUSG00000059689
ENSMUSG00000032011_Thy1	1.28188	1.02674	3.31889	0.00318376	0.032513	-1.84057	Thy1	21838	ENSMUSG00000032011
ENSMUSG00000062510_Nsl1	2.11169	-0.0135185	3.24603	0.00377904	0.0366828	-1.84691	Nsl1	381318	ENSMUSG00000062510
ENSMUSG00000038178_Slc43a2	0.737311	3.69083	3.5321	0.00192026	0.0237266	-1.84731	Slc43a2	215113	ENSMUSG00000038178
ENSMUSG00000078584_AU022252	-0.303411	5.7963	-3.61379	0.00157992	0.0211347	-1.85035	AU022252	230696	ENSMUSG00000078584
ENSMUSG00000029330_Cds1	1.51891	-0.554604	3.22611	0.0039598	0.0377859	-1.85122	Cds1	74596	ENSMUSG00000029330
ENSMUSG00000024132_Eci1	-0.671813	6.77214	-3.60721	0.00160501	0.0214127	-1.85555	Eci1	13177	ENSMUSG00000024132
ENSMUSG00000036381_P2ry14	1.12005	0.65838	3.27454	0.00353426	0.0350422	-1.86183	P2ry14	140795	ENSMUSG00000036381
ENSMUSG00000030188_Magohb	0.698051	1.24035	3.31947	0.00317945	0.0324946	-1.86747	Magohb	66441	ENSMUSG00000030188
ENSMUSG00000061119_Prcp	0.788011	3.50206	3.50512	0.00204772	0.0246232	-1.87416	Prcp	72461	ENSMUSG00000061119
ENSMUSG00000027559_Car3	-0.711959	10.8218	-3.52039	0.00197458	0.0241444	-1.87824	Car3	12350	ENSMUSG00000027559
ENSMUSG00000049744_Arhgap15	1.38736	0.497131	3.25974	0.00365934	0.0358704	-1.87927	Arhgap15	76117	ENSMUSG00000049744
ENSMUSG00000033538_Casp4	1.13085	0.68171	3.27553	0.00352599	0.034987	-1.88067	Casp4	12363	ENSMUSG00000033538
ENSMUSG00000040370_Etfrf1	-0.468059	5.0405	-3.58671	0.00168559	0.0220694	-1.88605	Etfrf1	67636	ENSMUSG00000040370
ENSMUSG00000030577_Cd22	0.966745	0.728469	3.27357	0.00354226	0.0350947	-1.8868	Cd22	12483	ENSMUSG00000030577
ENSMUSG00000095677_Dynlt1f	0.885435	2.15791	3.38961	0.00269387	0.0294101	-1.88837	Dynlt1f	100040531	ENSMUSG00000095677
ENSMUSG00000037613_Tnfrsf23	1.26184	0.0318042	3.23021	0.00392194	0.0375352	-1.88952	Tnfrsf23	79201	ENSMUSG00000037613
ENSMUSG00000044811_Cd300c2	1.16264	2.98311	3.46226	0.00226751	0.026263	-1.89322	Cd300c2	140497	ENSMUSG00000044811
ENSMUSG00000014778_Fhod1	0.751906	2.62231	3.42949	0.00245099	0.027532	-1.89488	Fhod1	234686	ENSMUSG00000014778
ENSMUSG00000022639_Dubr	1.06236	-0.243658	3.20693	0.00414176	0.0390332	-1.90282	NA	NA	ENSMUSG00000022639
ENSMUSG00000036362_P2ry13	1.17458	2.38259	3.40719	0.00258404	0.0285258	-1.90489	P2ry13	74191	ENSMUSG00000036362
ENSMUSG00000040751_Lat2	1.72132	-1.07503	3.19051	0.00430392	0.0401235	-1.90542	Lat2	56743	ENSMUSG00000040751
ENSMUSG00000032661_Oas3	1.40818	1.62096	3.33266	0.00308204	0.0319786	-1.90703	Oas3	246727	ENSMUSG00000032661
ENSMUSG00000007891_Ctsd	0.531999	9.06345	3.54643	0.00185575	0.0233076	-1.90973	Ctsd	13033	ENSMUSG00000007891
ENSMUSG00000051864_Tbc1d22a	0.41257	3.95966	3.52527	0.00195176	0.0239443	-1.91198	Tbc1d22a	223754	ENSMUSG00000051864
ENSMUSG00000025877_Hk3	1.77429	3.30115	3.47033	0.00222444	0.026064	-1.91208	Hk3	212032	ENSMUSG00000025877
ENSMUSG00000050989_Selenon	1.19338	1.85369	3.35245	0.00294136	0.0309142	-1.91331	Selenon	74777	ENSMUSG00000050989
ENSMUSG00000020773_Trim47	0.855401	2.4257	3.39873	0.00263634	0.0288085	-1.91401	Trim47	217333	ENSMUSG00000020773
ENSMUSG00000071714_Csf2rb2	1.69695	1.25643	3.30941	0.00325571	0.0330342	-1.91481	Csf2rb2	12984	ENSMUSG00000071714
ENSMUSG00000033845_Mrpl15	-0.380932	5.60694	-3.58177	0.00170562	0.0222417	-1.92074	Mrpl15	27395	ENSMUSG00000033845
ENSMUSG00000024477_Pggt1b	0.360455	4.29768	3.53632	0.00190103	0.0236427	-1.93055	Pggt1b	225467	ENSMUSG00000024477
ENSMUSG00000056602_Fry	0.829871	0.152847	3.21358	0.00407777	0.0385423	-1.93166	Fry	320365	ENSMUSG00000056602
ENSMUSG00000059089_Fcgr4	1.51154	3.76759	3.49908	0.00207738	0.0247999	-1.93313	Fcgr4	246256	ENSMUSG00000059089
ENSMUSG00000091050_9330020H09Rik	-1.18233	-0.591789	-3.18467	0.00436304	0.0405122	-1.93375	NA	NA	ENSMUSG00000091050
ENSMUSG00000037997_Parp11	0.694849	2.33269	3.38091	0.00274994	0.0297983	-1.94004	Parp11	101187	ENSMUSG00000037997
ENSMUSG00000039395_Mreg	-0.482042	5.11265	-3.56451	0.00177737	0.0228038	-1.94101	Mreg	381269	ENSMUSG00000039395
ENSMUSG00000038775_Vill	1.4624	1.08187	3.27289	0.00354801	0.0350979	-1.94171	Vill	22351	ENSMUSG00000038775
ENSMUSG00000028771_Ptpn12	0.407959	4.08076	3.51875	0.00198233	0.024173	-1.94404	Ptpn12	19248	ENSMUSG00000028771
ENSMUSG00000028223_Decr1	-0.427728	7.15428	-3.56421	0.00177866	0.0228038	-1.94418	Decr1	67460	ENSMUSG00000028223
ENSMUSG00000057193_Slc44a2	0.847264	3.35344	3.46479	0.00225392	0.0262332	-1.94715	Slc44a2	68682	ENSMUSG00000057193
ENSMUSG00000004642_Slbp	0.547815	3.83673	3.4954	0.00209566	0.0249418	-1.94778	Slbp	20492	ENSMUSG00000004642
ENSMUSG00000033192_Lpcat2	1.1533	2.09042	3.36187	0.00287658	0.0306557	-1.94934	Lpcat2	270084	ENSMUSG00000033192
ENSMUSG00000051950_B3glct	0.806898	0.886982	3.2517	0.00372907	0.0363065	-1.95371	B3glct	381694	ENSMUSG00000051950
ENSMUSG00000078956_Gm14221	1.52178	-0.209078	3.18318	0.0043783	0.0405831	-1.95422	NA	NA	ENSMUSG00000078956
ENSMUSG00000026866_Kynu	-0.425666	6.97203	-3.55987	0.00179718	0.0229313	-1.95886	Kynu	70789	ENSMUSG00000026866
ENSMUSG00000028383_Hsdl2	-0.398142	5.82962	-3.56648	0.00176902	0.0227478	-1.96073	Hsdl2	72479	ENSMUSG00000028383
ENSMUSG00000087638_Gm11773	-1.96066	-0.910196	-3.1596	0.00462613	0.0418031	-1.96564	NA	NA	ENSMUSG00000087638
ENSMUSG00000004612_Nkg7	1.59232	0.806877	3.25105	0.00373479	0.036308	-1.96847	Nkg7	72310	ENSMUSG00000004612
ENSMUSG00000042190_Cmklr1	1.23325	2.01477	3.34593	0.00298696	0.031293	-1.96899	Cmklr1	14747	ENSMUSG00000042190
ENSMUSG00000095028_Sirpb1b	1.89788	-0.470408	3.17129	0.00450157	0.0411368	-1.97189	Sirpb1b	668101	ENSMUSG00000095028
ENSMUSG00000030681_Mvp	0.679008	5.53078	3.55519	0.00181733	0.0229811	-1.97242	Mvp	78388	ENSMUSG00000030681
ENSMUSG00000057465_Saa2	2.78348	7.90517	3.53136	0.00192361	0.0237453	-1.97778	Saa2	20209	ENSMUSG00000057465
ENSMUSG00000002668_Dennd1c	1.04821	0.87913	3.24085	0.00382526	0.0370481	-1.97951	Dennd1c	70785	ENSMUSG00000002668
ENSMUSG00000030225_Dera	-0.453609	5.91903	-3.55774	0.00180631	0.0229313	-1.98177	Dera	232449	ENSMUSG00000030225
ENSMUSG00000040584_Abcb1a	0.755159	1.27955	3.26224	0.00363789	0.0357685	-1.98333	Abcb1a	18671	ENSMUSG00000040584
ENSMUSG00000051359_Ncald	0.390624	3.78943	3.48373	0.00215464	0.0254798	-1.98362	Ncald	52589	ENSMUSG00000051359
ENSMUSG00000035232_Pdk3	1.56027	-0.402295	3.16615	0.00455596	0.0414292	-1.98805	Pdk3	236900	ENSMUSG00000035232
ENSMUSG00000022952_Runx1	1.37883	-0.0584575	3.17827	0.00442885	0.0408179	-1.98889	Runx1	12394	ENSMUSG00000022952
ENSMUSG00000034641_Cd300ld	1.32538	3.70886	3.4716	0.0022177	0.0260354	-1.98904	Cd300ld	217305	ENSMUSG00000034641
ENSMUSG00000037474_Dtl	2.04205	-0.112817	3.17987	0.00441228	0.0407522	-1.99307	Dtl	76843	ENSMUSG00000037474
ENSMUSG00000031805_Jak3	0.637246	3.13704	3.42376	0.00248448	0.027806	-1.99933	Jak3	16453	ENSMUSG00000031805
ENSMUSG00000028745_Capzb	0.460507	6.62263	3.5466	0.00185497	0.0233076	-1.99992	Capzb	12345	ENSMUSG00000028745
ENSMUSG00000040940_Arhgef1	0.404568	4.97241	3.53353	0.0019137	0.0237242	-2.00129	Arhgef1	16801	ENSMUSG00000040940
ENSMUSG00000024855_Pacs1	0.710387	1.64825	3.29876	0.00333842	0.0335891	-2.0022	Pacs1	107975	ENSMUSG00000024855
ENSMUSG00000030798_Cd37	0.905389	1.48695	3.27668	0.00351649	0.0349731	-2.00739	Cd37	12493	ENSMUSG00000030798
ENSMUSG00000025044_Msr1	1.2982	4.19081	3.49082	0.0021186	0.0251685	-2.00769	Msr1	20288	ENSMUSG00000025044
ENSMUSG00000033952_Aspm	1.87698	-0.204973	3.184	0.00436991	0.0405344	-2.01057	Aspm	12316	ENSMUSG00000033952
ENSMUSG00000019874_Fabp7	2.07791	2.18152	3.32301	0.00315298	0.0323749	-2.01057	Fabp7	12140	ENSMUSG00000019874
ENSMUSG00000049532_Sall2	-0.59112	1.3377	-3.27169	0.00355803	0.0351434	-2.01091	Sall2	50524	ENSMUSG00000049532
ENSMUSG00000036777_Anln	1.99403	0.567343	3.21671	0.00404795	0.0383986	-2.01396	Anln	68743	ENSMUSG00000036777
ENSMUSG00000029380_Cxcl1	2.01389	1.92477	3.30736	0.00327152	0.0330702	-2.01624	Cxcl1	14825	ENSMUSG00000029380
ENSMUSG00000031903_Pla2g15	0.64028	4.54613	3.50579	0.00204448	0.0246232	-2.01964	Pla2g15	192654	ENSMUSG00000031903
ENSMUSG00000034485_Uaca	0.407903	3.07649	3.41468	0.00253859	0.0281682	-2.01972	Uaca	72565	ENSMUSG00000034485
ENSMUSG00000037010_Apln	5.22958	-2.86319	3.32939	0.00310595	0.0320668	-2.02792	Apln	30878	ENSMUSG00000037010
ENSMUSG00000054191_Klf1	-0.742741	0.409801	-3.19446	0.00426435	0.0398406	-2.03244	Klf1	16596	ENSMUSG00000054191
ENSMUSG00000032028_Nxpe2	-0.82171	3.8328	-3.46695	0.00224235	0.0262296	-2.03481	Nxpe2	78252	ENSMUSG00000032028
ENSMUSG00000020152_Actr2	0.354277	6.73149	3.52868	0.00193594	0.0238203	-2.03971	Actr2	66713	ENSMUSG00000020152
ENSMUSG00000026656_Fcgr2b	-0.912489	5.00512	-3.51693	0.00199094	0.0242086	-2.0411	Fcgr2b	14130	ENSMUSG00000026656
ENSMUSG00000085615_A330035P11Rik	-0.761614	0.216775	-3.17157	0.00449869	0.0411368	-2.04143	NA	NA	ENSMUSG00000085615
ENSMUSG00000067924_Rtl8b	0.433433	3.08503	3.40068	0.0026242	0.0288085	-2.04398	Rtl8b	553127	ENSMUSG00000067924
ENSMUSG00000037572_Wdhd1	1.32346	0.766491	3.19465	0.00426249	0.0398406	-2.04578	Wdhd1	218973	ENSMUSG00000037572
ENSMUSG00000001999_Blvra	0.665891	3.95527	3.46248	0.00226629	0.026263	-2.04825	Blvra	109778	ENSMUSG00000001999
ENSMUSG00000034401_Spata6	1.07975	0.233574	3.16288	0.00459079	0.0416581	-2.04841	Spata6	67946	ENSMUSG00000034401
ENSMUSG00000034807_Colgalt1	0.458982	6.15476	3.52849	0.00193682	0.0238203	-2.04882	Colgalt1	234407	ENSMUSG00000034807
ENSMUSG00000045551_Fpr1	1.44638	2.74556	3.37523	0.00278715	0.0300049	-2.05061	Fpr1	14293	ENSMUSG00000045551
ENSMUSG00000025647_Shisa5	0.624132	5.21691	3.5169	0.00199106	0.0242086	-2.0507	Shisa5	66940	ENSMUSG00000025647
ENSMUSG00000064246_Chil1	1.90536	-0.960321	3.12978	0.00495902	0.0436536	-2.05166	Chil1	12654	ENSMUSG00000064246
ENSMUSG00000079434_Neu2	-0.702248	0.969182	-3.21976	0.00401918	0.0382679	-2.05469	Neu2	23956	ENSMUSG00000079434
ENSMUSG00000028381_Ugcg	0.550472	4.01354	3.46525	0.00225144	0.0262332	-2.05495	Ugcg	22234	ENSMUSG00000028381
ENSMUSG00000038206_Fbxo8	-0.328397	5.49858	-3.52203	0.00196686	0.0240727	-2.05691	Fbxo8	50753	ENSMUSG00000038206
ENSMUSG00000059555_Tor4a	0.868653	2.96035	3.38375	0.00273149	0.0296729	-2.05953	Tor4a	227612	ENSMUSG00000059555
ENSMUSG00000041481_Serpina3g	1.88151	4.01224	3.45121	0.00232781	0.0267082	-2.06297	Serpina3g	20715	ENSMUSG00000041481
ENSMUSG00000014846_Tppp3	2.12835	-1.13615	3.10716	0.00522678	0.045121	-2.06751	Tppp3	67971	ENSMUSG00000014846
ENSMUSG00000026687_Aldh9a1	-0.327489	7.75458	-3.49952	0.00207518	0.0247999	-2.07301	Aldh9a1	56752	ENSMUSG00000026687
ENSMUSG00000034765_Dusp5	1.22296	-0.132234	3.13203	0.00493311	0.0435345	-2.07306	Dusp5	240672	ENSMUSG00000034765
ENSMUSG00000021939_Ctsb	0.479773	9.57289	3.46354	0.00226063	0.0262538	-2.07315	Ctsb	13030	ENSMUSG00000021939
ENSMUSG00000001517_Foxm1	2.25265	0.244006	3.16804	0.00453587	0.0412755	-2.07342	Foxm1	14235	ENSMUSG00000001517
ENSMUSG00000024613_Tcof1	0.627369	2.75713	3.36281	0.0028702	0.0306147	-2.07438	Tcof1	21453	ENSMUSG00000024613
ENSMUSG00000074264_Amy1	-0.524767	7.51542	-3.50195	0.00206325	0.0247609	-2.07454	Amy1	11722	ENSMUSG00000074264
ENSMUSG00000040350_Trim7	-0.586729	3.42852	-3.41763	0.0025209	0.02809	-2.07546	Trim7	94089	ENSMUSG00000040350
ENSMUSG00000026872_Zeb2	0.854487	3.66603	3.42908	0.00245332	0.027532	-2.07762	Zeb2	24136	ENSMUSG00000026872
ENSMUSG00000024026_Glo1	-0.428955	8.80966	-3.47699	0.00218945	0.0258208	-2.07785	Glo1	109801	ENSMUSG00000024026
ENSMUSG00000019763_Rmnd1	-0.429205	4.50137	-3.4846	0.00215022	0.025473	-2.07825	Rmnd1	66084	ENSMUSG00000019763
ENSMUSG00000044378_Slc15a5	-1.20392	1.54536	-3.2555	0.00369597	0.0360928	-2.07905	Slc15a5	277898	ENSMUSG00000044378
ENSMUSG00000048897_Zfp710	0.707254	3.78016	3.44133	0.00238306	0.0271001	-2.07984	Zfp710	209225	ENSMUSG00000048897
ENSMUSG00000031934_Panx1	1.09279	-0.0961321	3.13183	0.00493542	0.0435345	-2.08723	Panx1	55991	ENSMUSG00000031934
ENSMUSG00000025572_Tmc6	0.663824	3.1781	3.38929	0.00269595	0.0294101	-2.09363	Tmc6	217353	ENSMUSG00000025572
ENSMUSG00000037849_Ifi206	1.30122	0.416852	3.15519	0.00467391	0.0421172	-2.09405	Ifi206	102639543	ENSMUSG00000037849
ENSMUSG00000028713_Cyp4b1	-1.28593	3.50959	-3.39959	0.00263095	0.0288085	-2.10069	Cyp4b1	13120	ENSMUSG00000028713
ENSMUSG00000014547_Wdfy2	0.508627	4.19076	3.4535	0.00231519	0.0266074	-2.10182	Wdfy2	268752	ENSMUSG00000014547
ENSMUSG00000096606_Tpbgl	-1.13946	2.80322	-3.35212	0.00294364	0.0309142	-2.10494	Tpbgl	100503386	ENSMUSG00000096606
ENSMUSG00000060063_Alox5ap	1.38042	2.1522	3.28784	0.00342539	0.0342777	-2.10574	Alox5ap	11690	ENSMUSG00000060063
ENSMUSG00000030708_Dnajb13	1.35553	-0.940836	3.08982	0.00544154	0.0464278	-2.10703	Dnajb13	69387	ENSMUSG00000030708
ENSMUSG00000039231_Suv39h1	0.754454	2.54841	3.32878	0.00311035	0.0320668	-2.10754	Suv39h1	20937	ENSMUSG00000039231
ENSMUSG00000040723_Rcsd1	0.73556	2.57438	3.32896	0.00310903	0.0320668	-2.10854	Rcsd1	226594	ENSMUSG00000040723
ENSMUSG00000059108_Ifitm6	1.34706	-0.029127	3.11954	0.00507856	0.0442844	-2.1123	Ifitm6	213002	ENSMUSG00000059108
ENSMUSG00000038147_Cd84	1.15837	2.52888	3.32475	0.00314009	0.0323219	-2.11766	Cd84	12523	ENSMUSG00000038147
ENSMUSG00000028926_Cdk14	1.60681	1.01557	3.18741	0.00433518	0.0403858	-2.12353	Cdk14	18647	ENSMUSG00000028926
ENSMUSG00000003484_Cyp4f18	1.43134	0.301485	3.14307	0.00480783	0.0428764	-2.1265	Cyp4f18	72054	ENSMUSG00000003484
ENSMUSG00000040613_Apobec1	0.783995	3.92319	3.42879	0.00245505	0.027532	-2.12742	Apobec1	11810	ENSMUSG00000040613
ENSMUSG00000041064_Pif1	2.5247	-1.59405	3.074	0.00564485	0.0473414	-2.13077	Pif1	208084	ENSMUSG00000041064
ENSMUSG00000092021_Gbp11	1.32607	2.85763	3.33044	0.00309823	0.0320439	-2.13267	Gbp11	634650	ENSMUSG00000092021
ENSMUSG00000034681_Rnps1	0.364879	4.65217	3.46263	0.00226552	0.026263	-2.13572	Rnps1	19826	ENSMUSG00000034681
ENSMUSG00000048022_Tmem229a	1.3891	-0.206155	3.09042	0.00543401	0.0464149	-2.13593	Tmem229a	319832	ENSMUSG00000048022
ENSMUSG00000020717_Pecam1	0.700119	4.3428	3.44566	0.0023587	0.0268865	-2.13807	Pecam1	18613	ENSMUSG00000020717
ENSMUSG00000070713_Gm10282	1.07563	1.11204	3.17737	0.00443811	0.0408452	-2.14619	Gm10282	100042405	ENSMUSG00000070713
ENSMUSG00000042817_Flt3	1.55694	-1.21024	3.06806	0.00572306	0.0477808	-2.15375	Flt3	14255	ENSMUSG00000042817
ENSMUSG00000015733_Capza2	0.437055	5.95385	3.48132	0.00216702	0.0256029	-2.15745	Capza2	12343	ENSMUSG00000015733
ENSMUSG00000039115_Itga9	0.836994	4.34201	3.43677	0.00240897	0.0272672	-2.15869	Itga9	104099	ENSMUSG00000039115
ENSMUSG00000037940_Inpp4b	1.14717	-0.489292	3.07404	0.00564434	0.0473414	-2.16123	Inpp4b	234515	ENSMUSG00000037940
ENSMUSG00000027219_Slc28a2	1.82174	0.7872	3.14455	0.00479127	0.0428078	-2.16181	Slc28a2	269346	ENSMUSG00000027219
ENSMUSG00000054422_Fabp1	-0.656566	11.5345	-3.38291	0.00273696	0.0297073	-2.16194	Fabp1	14080	ENSMUSG00000054422
ENSMUSG00000032336_Nptn	0.337735	5.25651	3.47176	0.00221687	0.0260354	-2.16197	Nptn	20320	ENSMUSG00000032336
ENSMUSG00000091542_Gm17167	-1.32293	-0.857343	-3.06225	0.00580058	0.0482413	-2.16266	NA	NA	ENSMUSG00000091542
ENSMUSG00000030805_Stx4a	0.46158	4.65499	3.45069	0.0023307	0.0267082	-2.16436	Stx4a	20909	ENSMUSG00000030805
ENSMUSG00000037993_Dhx38	0.398957	4.29355	3.43102	0.00244208	0.027532	-2.16926	Dhx38	64340	ENSMUSG00000037993
ENSMUSG00000027351_Spred1	0.654627	3.62857	3.38617	0.00271593	0.0295534	-2.17477	Spred1	114715	ENSMUSG00000027351
ENSMUSG00000026779_Mastl	1.38528	0.0406808	3.08973	0.00544269	0.0464278	-2.17591	Mastl	67121	ENSMUSG00000026779
ENSMUSG00000026039_Sgo2a	2.01027	-0.776335	3.07565	0.00562341	0.0472841	-2.1765	Sgo2a	68549	ENSMUSG00000026039
ENSMUSG00000032698_Lmo2	0.647474	2.35393	3.28195	0.00347321	0.0346794	-2.18233	Lmo2	16909	ENSMUSG00000032698
ENSMUSG00000021242_Npc2	0.580362	6.69605	3.46593	0.00224781	0.0262332	-2.18566	Npc2	67963	ENSMUSG00000021242
ENSMUSG00000042644_Itpr3	1.08665	1.22215	3.17545	0.00445813	0.040913	-2.18614	Itpr3	16440	ENSMUSG00000042644
ENSMUSG00000048878_Hexim1	-0.463806	5.38413	-3.46419	0.00225711	0.0262364	-2.1871	Hexim1	192231	ENSMUSG00000048878
ENSMUSG00000097141_Gm10524	-1.10897	2.2695	-3.2819	0.00347362	0.0346794	-2.18849	NA	NA	ENSMUSG00000097141
ENSMUSG00000056124_B4galt6	1.29039	1.51757	3.19726	0.00423657	0.0397039	-2.18937	B4galt6	56386	ENSMUSG00000056124
ENSMUSG00000010307_Tmem86a	0.988606	4.03251	3.40235	0.00261382	0.028732	-2.19005	Tmem86a	67893	ENSMUSG00000010307
ENSMUSG00000109350_Gm44805	-0.598059	4.69035	-3.44084	0.00238583	0.0271001	-2.19141	Gm44805	105886299	ENSMUSG00000109350
ENSMUSG00000023132_Gzma	1.60325	1.78465	3.21838	0.00403214	0.0383631	-2.19365	Gzma	14938	ENSMUSG00000023132
ENSMUSG00000025937_Lactb2	-0.414809	8.17824	-3.4398	0.00239173	0.0271195	-2.19386	Lactb2	212442	ENSMUSG00000025937
ENSMUSG00000028525_Pde4b	0.748519	3.6333	3.37517	0.00278755	0.0300049	-2.19756	Pde4b	18578	ENSMUSG00000028525
ENSMUSG00000011008_Mcoln2	1.78094	-1.40498	3.03422	0.00618901	0.0506264	-2.20609	Mcoln2	68279	ENSMUSG00000011008
ENSMUSG00000038599_Capn8	-1.85871	-0.304311	-3.06896	0.0057112	0.047728	-2.20628	Capn8	170725	ENSMUSG00000038599
ENSMUSG00000033808_Tmem87a	0.583088	2.76625	3.30241	0.00330984	0.0333534	-2.20711	Tmem87a	211499	ENSMUSG00000033808
ENSMUSG00000026605_Cenpf	1.91726	0.175487	3.1209	0.00506247	0.0442334	-2.20812	Cenpf	108000	ENSMUSG00000026605
ENSMUSG00000029017_Pmpcb	-0.379076	6.52863	-3.45582	0.00230244	0.0265251	-2.21253	Pmpcb	73078	ENSMUSG00000029017
ENSMUSG00000001131_Timp1	1.62054	-1.72662	3.03059	0.00624116	0.0508922	-2.21304	Timp1	21857	ENSMUSG00000001131
ENSMUSG00000037447_Arid5a	1.01789	0.884264	3.13887	0.00485519	0.0430683	-2.21443	Arid5a	214855	ENSMUSG00000037447
ENSMUSG00000070000_Fcho1	1.71786	-1.39208	3.02884	0.00626644	0.0509078	-2.21672	Fcho1	74015	ENSMUSG00000070000
ENSMUSG00000068083_Cyp2d40	-1.02636	6.5796	-3.44992	0.00233496	0.0267334	-2.22115	Cyp2d40	71754	ENSMUSG00000068083
ENSMUSG00000029414_Kntc1	2.10228	-0.459254	3.06398	0.00577747	0.0481728	-2.22242	Kntc1	208628	ENSMUSG00000029414
ENSMUSG00000026922_Agpat2	-0.395193	7.92134	-3.43168	0.00243829	0.027532	-2.22451	Agpat2	67512	ENSMUSG00000026922
ENSMUSG00000033207_Mamdc2	-0.766547	1.03332	-3.14266	0.00481248	0.0428884	-2.22461	Mamdc2	71738	ENSMUSG00000033207
ENSMUSG00000049191_Rtl5	1.15705	0.175836	3.07495	0.00563253	0.0472993	-2.22761	Rtl5	331474	ENSMUSG00000049191
ENSMUSG00000055612_Cdca7	1.19345	0.758714	3.11167	0.00517238	0.0447484	-2.22818	Cdca7	66953	ENSMUSG00000055612
ENSMUSG00000001025_S100a6	1.08595	1.30558	3.16208	0.00459946	0.0416811	-2.22845	S100a6	20200	ENSMUSG00000001025
ENSMUSG00000037991_Rmi2	1.73749	-1.7254	3.02218	0.00636353	0.0515653	-2.23103	Rmi2	223970	ENSMUSG00000037991
ENSMUSG00000020388_Pdlim4	1.283	0.997065	3.13517	0.00489711	0.0433278	-2.23246	Pdlim4	30794	ENSMUSG00000020388
ENSMUSG00000024725_Ostf1	0.338951	5.36139	3.44157	0.00238169	0.0271001	-2.23519	Ostf1	20409	ENSMUSG00000024725
ENSMUSG00000016087_Fli1	0.95537	1.70037	3.19176	0.00429139	0.0400354	-2.23536	Fli1	14247	ENSMUSG00000016087
ENSMUSG00000042677_Zc3h12a	0.957804	1.48305	3.17089	0.00450578	0.0411462	-2.23685	Zc3h12a	230738	ENSMUSG00000042677
ENSMUSG00000025134_Alyref	0.427396	3.61156	3.35564	0.00291923	0.0307763	-2.23873	Alyref	21681	ENSMUSG00000025134
ENSMUSG00000112527_Gm35696	-1.57171	0.340246	-3.08341	0.00552315	0.0467442	-2.24167	NA	NA	ENSMUSG00000112527
ENSMUSG00000079547_H2-DMb1	1.5272	3.45873	3.34489	0.00299436	0.0313295	-2.24373	H2-DMb1	14999	ENSMUSG00000079547
ENSMUSG00000105504_Gbp5	1.58024	1.76397	3.19256	0.00428336	0.0399893	-2.24622	Gbp5	229898	ENSMUSG00000105504
ENSMUSG00000029647_Pan3	0.499426	3.03408	3.30981	0.00325265	0.0330341	-2.24689	Pan3	72587	ENSMUSG00000029647
ENSMUSG00000038522_Mfsd4b1	-0.583455	5.1267	-3.43141	0.00243982	0.027532	-2.24822	Mfsd4b1	215929	ENSMUSG00000038522
ENSMUSG00000024795_Kif20b	2.03622	0.036404	3.06416	0.00577509	0.0481728	-2.24937	Kif20b	240641	ENSMUSG00000024795
ENSMUSG00000022551_Cyc1	-0.366166	7.85083	-3.42148	0.00249797	0.0279087	-2.24976	Cyc1	66445	ENSMUSG00000022551
ENSMUSG00000020100_Slc29a3	0.680002	2.35369	3.24404	0.00379677	0.0368272	-2.25005	Slc29a3	71279	ENSMUSG00000020100
ENSMUSG00000029552_Tes	1.02825	0.965957	3.12364	0.00503036	0.044042	-2.25138	Tes	21753	ENSMUSG00000029552
ENSMUSG00000002835_Chaf1a	1.55498	1.06593	3.12671	0.00499457	0.0438473	-2.25366	Chaf1a	27221	ENSMUSG00000002835
ENSMUSG00000026238_Ptma	0.345067	8.09213	3.41484	0.00253758	0.0281682	-2.25604	Ptma	19231	ENSMUSG00000026238
ENSMUSG00000031756_Cenpn	1.56061	-0.342734	3.02951	0.0062567	0.0509078	-2.26233	Cenpn	72155	ENSMUSG00000031756
ENSMUSG00000060441_Trim5	0.840088	0.721259	3.09835	0.00533487	0.0457628	-2.26343	Trim5	667823	ENSMUSG00000060441
ENSMUSG00000043015_Nemp2	1.50477	-0.921796	3.00515	0.00661835	0.0530912	-2.26734	Nemp2	227094	ENSMUSG00000043015
ENSMUSG00000056515_Rab31	0.928138	2.77896	3.27578	0.00352393	0.034987	-2.26778	Rab31	106572	ENSMUSG00000056515
ENSMUSG00000031173_Otc	-0.486352	8.50733	-3.39932	0.00263266	0.0288085	-2.26939	Otc	18416	ENSMUSG00000031173
ENSMUSG00000057329_Bcl2	1.08816	0.598083	3.08473	0.00550616	0.0466619	-2.27034	Bcl2	12043	ENSMUSG00000057329
ENSMUSG00000028790_Khdrbs1	0.414229	4.95898	3.41403	0.0025425	0.0281873	-2.27353	Khdrbs1	20218	ENSMUSG00000028790
ENSMUSG00000001482_Def8	-0.291065	5.16581	-3.42182	0.00249594	0.0279087	-2.27426	Def8	23854	ENSMUSG00000001482
ENSMUSG00000044148_1810030O07Rik	0.447981	2.77773	3.27313	0.00354595	0.0350979	-2.27652	1810030O07Rik	69155	ENSMUSG00000044148
ENSMUSG00000032324_Tspan3	0.697361	2.41445	3.24016	0.00383146	0.0370804	-2.27711	Tspan3	56434	ENSMUSG00000032324
ENSMUSG00000064254_Ethe1	-0.479362	6.32087	-3.4295	0.00245092	0.027532	-2.27713	Ethe1	66071	ENSMUSG00000064254
ENSMUSG00000016495_Plgrkt	0.889483	1.82593	3.1793	0.00441819	0.0407777	-2.28033	Plgrkt	67759	ENSMUSG00000016495
ENSMUSG00000061578_Ksr2	1.96267	0.129613	3.03918	0.00611859	0.0503365	-2.28461	Ksr2	333050	ENSMUSG00000061578
ENSMUSG00000059895_Ptp4a3	0.602957	3.25807	3.31107	0.00324304	0.0329624	-2.28649	Ptp4a3	19245	ENSMUSG00000059895
ENSMUSG00000032966_Fkbp1a	0.334282	5.99243	3.4245	0.00248012	0.0277812	-2.28867	Fkbp1a	14225	ENSMUSG00000032966
ENSMUSG00000040253_Gbp7	0.944839	3.91818	3.35357	0.00293361	0.0308807	-2.29299	Gbp7	229900	ENSMUSG00000040253
ENSMUSG00000094806_Cyp2d10	-0.534354	9.86222	-3.35994	0.00288975	0.030722	-2.29395	Cyp2d10	13101	ENSMUSG00000094806
ENSMUSG00000020808_Pimreg	2.68909	-0.702768	3.0013	0.00667734	0.0533186	-2.29448	Pimreg	109212	ENSMUSG00000020808
ENSMUSG00000020941_Map3k14	0.799356	1.57206	3.15597	0.00466549	0.0420706	-2.29504	Map3k14	53859	ENSMUSG00000020941
ENSMUSG00000031309_Rps6ka3	0.590569	3.42362	3.31735	0.00319535	0.0326056	-2.29593	Rps6ka3	110651	ENSMUSG00000031309
ENSMUSG00000052142_Rasal3	1.42677	-0.248944	3.01304	0.00649905	0.0523878	-2.29649	Rasal3	320484	ENSMUSG00000052142
ENSMUSG00000043931_Gimap7	1.35803	-0.584084	3.00539	0.00661462	0.0530912	-2.29669	Gimap7	231932	ENSMUSG00000043931
ENSMUSG00000102051_Ly6a2	3.09322	-3.38477	3.14113	0.00482964	0.0430117	-2.29736	NA	NA	ENSMUSG00000102051
ENSMUSG00000038742_Angptl6	-0.687174	4.02696	-3.35543	0.00292072	0.0307763	-2.30527	Angptl6	70726	ENSMUSG00000038742
ENSMUSG00000047712_Ust	1.21857	0.146328	3.03659	0.00615521	0.0504774	-2.30947	Ust	338362	ENSMUSG00000047712
ENSMUSG00000051413_Plagl2	0.719525	2.0385	3.18257	0.00438458	0.040601	-2.31309	Plagl2	54711	ENSMUSG00000051413
ENSMUSG00000024556_Me2	1.45238	1.95915	3.18238	0.0043865	0.040601	-2.31338	Me2	107029	ENSMUSG00000024556
ENSMUSG00000021135_Slc10a1	-0.657004	8.79927	-3.3741	0.00279461	0.030031	-2.31445	Slc10a1	20493	ENSMUSG00000021135
ENSMUSG00000004709_Cd244a	2.08674	-1.00712	2.98131	0.0069916	0.0547366	-2.3146	Cd244a	18106	ENSMUSG00000004709
ENSMUSG00000020154_Ptprb	-0.968646	5.08631	-3.39981	0.00262958	0.0288085	-2.31525	Ptprb	19263	ENSMUSG00000020154
ENSMUSG00000026821_Ralgds	0.926145	0.926456	3.08869	0.00545592	0.0464794	-2.31793	Ralgds	19730	ENSMUSG00000026821
ENSMUSG00000025804_Ccr1	2.3549	-1.65978	2.97605	0.00707657	0.0552485	-2.31971	Ccr1	12768	ENSMUSG00000025804
ENSMUSG00000004730_Adgre1	1.48367	5.29273	3.38879	0.00269913	0.0294201	-2.32124	Adgre1	13733	ENSMUSG00000004730
ENSMUSG00000028307_Aldob	-0.528341	11.586	-3.31267	0.00323083	0.0328729	-2.32135	Aldob	230163	ENSMUSG00000028307
ENSMUSG00000020629_Adi1	-0.356258	6.88976	-3.40409	0.00260311	0.028663	-2.32138	Adi1	104923	ENSMUSG00000020629
ENSMUSG00000062488_Ifit3b	0.718227	2.56142	3.23914	0.00384063	0.0371238	-2.32254	Ifit3b	667370	ENSMUSG00000062488
ENSMUSG00000040322_Slc25a24	1.0948	0.931638	3.08058	0.00555944	0.0469597	-2.32408	Slc25a24	229731	ENSMUSG00000040322
ENSMUSG00000049866_Arl4c	1.064	2.09923	3.19637	0.00424531	0.0397488	-2.32499	Arl4c	320982	ENSMUSG00000049866
ENSMUSG00000073830_Mup14	-1.12456	9.38156	-3.35327	0.00293568	0.0308807	-2.32538	Mup14	100039116	ENSMUSG00000073830
ENSMUSG00000026888_Grb14	-0.354098	5.57566	-3.40528	0.00259576	0.0286226	-2.32786	Grb14	50915	ENSMUSG00000026888
ENSMUSG00000094796_BC147527	1.62862	-1.0104	2.97082	0.00716219	0.0554511	-2.33204	BC147527	625360	ENSMUSG00000094796
ENSMUSG00000032344_Cgas	1.86991	-1.05463	2.97089	0.00716105	0.0554511	-2.33484	Cgas	214763	ENSMUSG00000032344
ENSMUSG00000035314_Gdpd5	0.924524	0.522179	3.05271	0.00593009	0.0490977	-2.33489	Gdpd5	233552	ENSMUSG00000035314
ENSMUSG00000028879_Stx12	0.330103	4.20967	3.35539	0.002921	0.0307763	-2.3359	Stx12	100226	ENSMUSG00000028879
ENSMUSG00000000876_Pxmp4	-0.642523	6.73102	-3.39938	0.00263231	0.0288085	-2.3359	Pxmp4	59038	ENSMUSG00000000876
ENSMUSG00000027326_Knl1	2.26043	-0.854944	2.98936	0.00686331	0.0541248	-2.33889	Knl1	76464	ENSMUSG00000027326
ENSMUSG00000025229_Pitx3	-1.28868	1.24275	-3.11631	0.00511685	0.0444984	-2.34137	Pitx3	18742	ENSMUSG00000025229
ENSMUSG00000032314_Etfa	-0.372141	8.07406	-3.37686	0.00277643	0.0299849	-2.3414	Etfa	110842	ENSMUSG00000032314
ENSMUSG00000032846_Zswim6	0.820712	1.4305	3.12563	0.00500713	0.0439173	-2.34216	Zswim6	67263	ENSMUSG00000032846
ENSMUSG00000038855_Itpkb	0.743548	3.26081	3.28496	0.00344865	0.0344839	-2.34267	Itpkb	320404	ENSMUSG00000038855
ENSMUSG00000109244_Gm44751	1.41714	-0.0841058	2.99877	0.00671631	0.0534539	-2.34448	NA	NA	ENSMUSG00000109244
ENSMUSG00000117098_Gm49909	0.558676	4.84255	3.37121	0.00281379	0.0302006	-2.35782	NA	NA	ENSMUSG00000117098
ENSMUSG00000034254_Agpat1	0.696104	2.66221	3.2173	0.0040424	0.0383986	-2.36201	Agpat1	55979	ENSMUSG00000034254
ENSMUSG00000074896_Ifit3	0.750442	4.48984	3.35776	0.00290464	0.0307763	-2.36286	Ifit3	15959	ENSMUSG00000074896
ENSMUSG00000029084_Cd38	0.872709	4.18286	3.33675	0.00305242	0.0317221	-2.36347	Cd38	12494	ENSMUSG00000029084
ENSMUSG00000078922_Tgtp1	2.33614	5.06275	3.36155	0.00287878	0.0306557	-2.36362	Tgtp1	21822	ENSMUSG00000078922
ENSMUSG00000018168_Ikzf3	1.59722	-0.502472	2.97123	0.00715547	0.0554511	-2.36469	Ikzf3	22780	ENSMUSG00000018168
ENSMUSG00000024065_Ehd3	-0.831903	5.53095	-3.38762	0.00270661	0.0294768	-2.36568	Ehd3	57440	ENSMUSG00000024065
ENSMUSG00000002257_Def6	1.58434	-0.82206	2.95946	0.00735143	0.0563276	-2.36759	Def6	23853	ENSMUSG00000002257
ENSMUSG00000028884_Rpa2	0.76735	2.86682	3.23203	0.00390521	0.037408	-2.36947	Rpa2	19891	ENSMUSG00000028884
ENSMUSG00000029816_Gpnmb	2.80132	-2.13492	2.95084	0.00749812	0.0570293	-2.37075	Gpnmb	93695	ENSMUSG00000029816
ENSMUSG00000009291_Pttg1ip	-0.256975	7.75724	-3.36983	0.00282298	0.0302606	-2.37102	Pttg1ip	108705	ENSMUSG00000009291
ENSMUSG00000031533_Mrps31	-0.401717	4.76119	-3.36323	0.00286738	0.0306098	-2.37971	Mrps31	57312	ENSMUSG00000031533
ENSMUSG00000050232_Cxcr3	1.09699	-0.41338	2.9723	0.00713779	0.055412	-2.38563	Cxcr3	12766	ENSMUSG00000050232
ENSMUSG00000021711_Trappc13	-0.2709	4.35929	-3.34185	0.00301593	0.0314946	-2.38762	Trappc13	66975	ENSMUSG00000021711
ENSMUSG00000032121_Tmem218	-0.524457	2.16904	-3.16958	0.00451957	0.041214	-2.38847	Tmem218	66279	ENSMUSG00000032121
ENSMUSG00000034165_Ccnd3	0.444972	5.25042	3.36898	0.00282868	0.0302966	-2.39499	Ccnd3	12445	ENSMUSG00000034165
ENSMUSG00000069910_Spdl1	2.17647	-0.813203	2.94505	0.00759827	0.0576054	-2.39606	Spdl1	70385	ENSMUSG00000069910
ENSMUSG00000025163_Cd7	1.1651	0.609078	3.03734	0.00614461	0.0504224	-2.39608	Cd7	12516	ENSMUSG00000025163
ENSMUSG00000026358_Rgs1	1.23462	0.46296	3.02315	0.00634921	0.0515129	-2.40198	Rgs1	50778	ENSMUSG00000026358
ENSMUSG00000024334_H2-Oa	1.23268	-1.00261	2.93561	0.00776439	0.0584786	-2.40403	H2-Oa	15001	ENSMUSG00000024334
ENSMUSG00000027863_Cd2	1.31096	-0.876369	2.93711	0.00773777	0.0583895	-2.40609	Cd2	12481	ENSMUSG00000027863
ENSMUSG00000022040_Ephx2	-0.500326	9.20524	-3.32348	0.00314955	0.0323725	-2.40798	Ephx2	13850	ENSMUSG00000022040
ENSMUSG00000023034_Nr4a1	1.90339	1.57473	3.09297	0.00540191	0.0462017	-2.40917	Nr4a1	15370	ENSMUSG00000023034
ENSMUSG00000027635_Dsn1	1.90952	-0.946072	2.93454	0.0077835	0.0585344	-2.40959	Dsn1	66934	ENSMUSG00000027635
ENSMUSG00000008822_Acyp1	-0.685455	2.71195	-3.21302	0.00408308	0.0385644	-2.40999	Acyp1	66204	ENSMUSG00000008822
ENSMUSG00000045826_Ptprcap	1.06146	1.30744	3.07648	0.00561257	0.0472505	-2.41049	Ptprcap	19265	ENSMUSG00000045826
ENSMUSG00000037762_Slc16a9	1.30346	1.76247	3.12023	0.00507045	0.0442733	-2.41313	Slc16a9	66859	ENSMUSG00000037762
ENSMUSG00000029171_Pgm2	0.490247	2.30991	3.16385	0.00458044	0.0416226	-2.41473	Pgm2	66681	ENSMUSG00000029171
ENSMUSG00000037679_Inf2	0.465098	4.92685	3.35103	0.00295123	0.0309687	-2.41699	Inf2	70435	ENSMUSG00000037679
ENSMUSG00000050663_Trhde	-1.09246	-0.229521	-2.96117	0.00732255	0.0561728	-2.41786	Trhde	237553	ENSMUSG00000050663
ENSMUSG00000058207_Serpina3k	-0.60535	13.557	-3.22778	0.00394432	0.0376659	-2.41905	Serpina3k	20714	ENSMUSG00000058207
ENSMUSG00000042807_Hecw2	1.04329	0.879998	3.03443	0.00618605	0.0506264	-2.41927	Hecw2	329152	ENSMUSG00000042807
ENSMUSG00000034858_Fam214a	-0.593021	4.71586	-3.34476	0.00299528	0.0313295	-2.42038	Fam214a	235493	ENSMUSG00000034858
ENSMUSG00000075284_Wipf1	1.12136	2.9292	3.21683	0.00404686	0.0383986	-2.42092	Wipf1	215280	ENSMUSG00000075284
ENSMUSG00000116262_Gm49544	-0.569701	2.19779	-3.16859	0.00453004	0.0412514	-2.42146	NA	NA	ENSMUSG00000116262
ENSMUSG00000040188_Scamp2	0.357799	4.32882	3.32092	0.00316856	0.0324089	-2.42629	Scamp2	24044	ENSMUSG00000040188
ENSMUSG00000044345_Marveld1	-0.323713	4.58056	-3.33573	0.00305979	0.0317733	-2.42688	Marveld1	277010	ENSMUSG00000044345
ENSMUSG00000066877_Nck2	0.636574	1.82617	3.11691	0.00510976	0.0444666	-2.42986	Nck2	17974	ENSMUSG00000066877
ENSMUSG00000025498_Irf7	0.967656	6.24481	3.3608	0.00288389	0.0306849	-2.42987	Irf7	54123	ENSMUSG00000025498
ENSMUSG00000030447_Cyfip1	0.448995	5.38802	3.35678	0.00291141	0.0307763	-2.43	Cyfip1	20430	ENSMUSG00000030447
ENSMUSG00000034041_Lyl1	1.0341	0.0829455	2.97478	0.00709732	0.0552757	-2.43082	Lyl1	17095	ENSMUSG00000034041
ENSMUSG00000024013_Fgd2	1.1376	2.24472	3.16187	0.00460167	0.0416811	-2.43092	Fgd2	26382	ENSMUSG00000024013
ENSMUSG00000022973_Synj1	0.521066	3.16312	3.23799	0.003851	0.0371308	-2.43318	Synj1	104015	ENSMUSG00000022973
ENSMUSG00000097352_C920009B18Rik	2.22815	-2.31662	2.91762	0.00809046	0.0599333	-2.43428	NA	NA	ENSMUSG00000097352
ENSMUSG00000032915_Adgre4	1.29713	3.4988	3.26091	0.0036493	0.0358139	-2.43784	Adgre4	52614	ENSMUSG00000032915
ENSMUSG00000073940_Hbb-bt	2.34603	3.99026	3.29245	0.00338845	0.0339605	-2.43984	Hbb-bt	101488143	ENSMUSG00000073940
ENSMUSG00000057228_Aadat	-0.650724	5.9687	-3.35768	0.0029052	0.0307763	-2.44138	Aadat	23923	ENSMUSG00000057228
ENSMUSG00000029616_Erp29	0.488896	6.16842	3.35587	0.00291768	0.0307763	-2.44658	Erp29	67397	ENSMUSG00000029616
ENSMUSG00000076498_Trbc2	1.07634	0.576554	3.00121	0.00667873	0.0533186	-2.44688	Trbc2	100125263	ENSMUSG00000076498
ENSMUSG00000028127_Abcd3	-0.431249	8.90334	-3.31255	0.00323169	0.0328729	-2.45166	Abcd3	19299	ENSMUSG00000028127
ENSMUSG00000013974_Mcemp1	2.0879	-2.41479	2.92119	0.0080248	0.05962	-2.45208	Mcemp1	69189	ENSMUSG00000013974
ENSMUSG00000030147_Clec4b1	1.78856	-1.08646	2.90649	0.00829883	0.0607814	-2.46113	Clec4b1	69810	ENSMUSG00000030147
ENSMUSG00000049588_Ccdc69	1.07966	0.158806	2.9486	0.00753672	0.0572728	-2.46389	Ccdc69	52570	ENSMUSG00000049588
ENSMUSG00000049723_Mmp12	4.61484	-1.57213	2.90114	0.00840084	0.0613255	-2.46396	Mmp12	17381	ENSMUSG00000049723
ENSMUSG00000039005_Tlr4	1.36868	1.34037	3.05861	0.00584974	0.0485833	-2.46584	Tlr4	21898	ENSMUSG00000039005
ENSMUSG00000037664_Cdkn1c	-0.91763	0.363883	-2.97248	0.00713483	0.055412	-2.47184	Cdkn1c	12577	ENSMUSG00000037664
ENSMUSG00000071711_Mpst	-0.37534	6.79658	-3.33991	0.00302978	0.0315827	-2.47251	Mpst	246221	ENSMUSG00000071711
ENSMUSG00000020534_Shmt1	-0.365206	7.26434	-3.33137	0.00309146	0.0320251	-2.47643	Shmt1	20425	ENSMUSG00000020534
ENSMUSG00000042797_Aqp11	-0.337539	4.61849	-3.31327	0.00322624	0.0328691	-2.48054	Aqp11	66333	ENSMUSG00000042797
ENSMUSG00000040061_Plcb2	1.24332	0.902897	3.01094	0.00653058	0.0525898	-2.48066	Plcb2	18796	ENSMUSG00000040061
ENSMUSG00000002781_Tmem143	-0.307423	4.13259	-3.28986	0.00340913	0.0341414	-2.48129	Tmem143	70209	ENSMUSG00000002781
ENSMUSG00000020458_Rtn4	0.473977	6.32297	3.33964	0.00303168	0.0315827	-2.48205	Rtn4	68585	ENSMUSG00000020458
ENSMUSG00000033272_Slc35a4	0.521334	3.74714	3.25924	0.00366365	0.0358776	-2.48277	Slc35a4	67843	ENSMUSG00000033272
ENSMUSG00000030378_Sult2a8	-0.644702	9.06396	-3.29295	0.00338446	0.0339605	-2.48367	Sult2a8	76971	ENSMUSG00000030378
ENSMUSG00000073412_Lst1	1.29134	2.469	3.15453	0.0046811	0.0421527	-2.48941	Lst1	16988	ENSMUSG00000073412
ENSMUSG00000034880_Mrpl34	-0.447126	5.3912	-3.33092	0.00309474	0.0320334	-2.49225	Mrpl34	94065	ENSMUSG00000034880
ENSMUSG00000032640_Chsy1	0.564742	2.04421	3.10449	0.00525939	0.0453421	-2.4938	Chsy1	269941	ENSMUSG00000032640
ENSMUSG00000069792_Wfdc17	1.17382	4.81845	3.30848	0.00326286	0.0330342	-2.49385	Wfdc17	100034251	ENSMUSG00000069792
ENSMUSG00000046157_Tmem229b	1.21202	1.74469	3.07624	0.00561563	0.0472505	-2.49449	Tmem229b	268567	ENSMUSG00000046157
ENSMUSG00000036641_Ccdc148	0.943787	0.627048	2.98579	0.00692001	0.0544724	-2.4979	Ccdc148	227933	ENSMUSG00000036641
ENSMUSG00000029472_Anapc5	0.282412	5.76264	3.33143	0.003091	0.0320251	-2.49939	Anapc5	59008	ENSMUSG00000029472
ENSMUSG00000021830_Txndc16	0.691204	2.13221	3.11134	0.00517634	0.0447484	-2.50121	Txndc16	70561	ENSMUSG00000021830
ENSMUSG00000027406_Idh3b	-0.310994	7.08011	-3.32253	0.00315659	0.0323749	-2.50153	Idh3b	170718	ENSMUSG00000027406
ENSMUSG00000055148_Klf2	0.779326	3.58865	3.23827	0.00384848	0.0371308	-2.50755	Klf2	16598	ENSMUSG00000055148
ENSMUSG00000074874_Ctla2b	1.94669	2.97241	3.17755	0.00443624	0.0408452	-2.50803	Ctla2b	13025	ENSMUSG00000074874
ENSMUSG00000039126_Prune2	2.2183	-0.0487891	2.92944	0.00787489	0.0590115	-2.51043	Prune2	353211	ENSMUSG00000039126
ENSMUSG00000079426_Arpc4	0.424796	6.07971	3.32741	0.00312048	0.0321456	-2.51051	Arpc4	68089	ENSMUSG00000079426
ENSMUSG00000069893_9930111J21Rik1	1.51764	-0.173773	2.92315	0.00798891	0.0595776	-2.51304	9930111J21Rik1	667214	ENSMUSG00000069893
ENSMUSG00000027399_Il1a	0.916227	1.71347	3.07623	0.00561576	0.0472505	-2.51366	Il1a	16175	ENSMUSG00000027399
ENSMUSG00000059323_Tonsl	1.01681	0.214374	2.93719	0.00773628	0.0583895	-2.51435	Tonsl	72749	ENSMUSG00000059323
ENSMUSG00000019942_Cdk1	1.67907	1.86636	3.10564	0.00524533	0.0452511	-2.51456	Cdk1	12534	ENSMUSG00000019942
ENSMUSG00000026223_Itm2c	0.489573	5.78451	3.32096	0.00316828	0.0324089	-2.52035	Itm2c	64294	ENSMUSG00000026223
ENSMUSG00000039873_Neurl2	0.661345	0.591107	2.96417	0.00727231	0.0559199	-2.52248	Neurl2	415115	ENSMUSG00000039873
ENSMUSG00000018995_Nars2	-0.363329	4.13014	-3.26993	0.00357278	0.0352622	-2.52271	Nars2	244141	ENSMUSG00000018995
ENSMUSG00000029247_Paics	-0.272802	7.43321	-3.30757	0.00326985	0.0330702	-2.52463	Paics	67054	ENSMUSG00000029247
ENSMUSG00000045322_Tlr9	1.94138	-0.894809	2.88165	0.00878244	0.0632854	-2.53424	Tlr9	81897	ENSMUSG00000045322
ENSMUSG00000033075_Senp1	0.546878	2.49718	3.12863	0.00497228	0.0437109	-2.5391	Senp1	223870	ENSMUSG00000033075
ENSMUSG00000079227_Ccr5	1.36901	3.39664	3.20585	0.00415224	0.0390751	-2.54171	Ccr5	12774	ENSMUSG00000079227
ENSMUSG00000057948_Unc13d	1.03497	0.40439	2.94473	0.00760383	0.0576138	-2.54204	Unc13d	70450	ENSMUSG00000057948
ENSMUSG00000022089_Bin3	0.539642	3.53875	3.2173	0.0040424	0.0383986	-2.54452	Bin3	57784	ENSMUSG00000022089
ENSMUSG00000029401_Rilpl2	0.725565	3.37098	3.20284	0.00418161	0.0392944	-2.54514	Rilpl2	80291	ENSMUSG00000029401
ENSMUSG00000002107_Celf2	0.850217	3.19882	3.18619	0.00434761	0.0404724	-2.5476	Celf2	14007	ENSMUSG00000002107
ENSMUSG00000002068_Ccne1	1.66668	0.238237	2.91684	0.00810497	0.0599721	-2.55093	Ccne1	12447	ENSMUSG00000002068
ENSMUSG00000075225_Ccdc162	-0.53331	3.32377	-3.19508	0.00425816	0.0398403	-2.55835	Ccdc162	75973	ENSMUSG00000075225
ENSMUSG00000020395_Itk	1.16262	-0.532078	2.87469	0.0089226	0.0638336	-2.56003	Itk	16428	ENSMUSG00000020395
ENSMUSG00000003153_Slc2a3	1.00112	-0.504677	2.8767	0.00888192	0.0636833	-2.56077	Slc2a3	20527	ENSMUSG00000003153
ENSMUSG00000013787_Ehmt2	0.261144	5.73508	3.303	0.00330526	0.0333332	-2.56453	Ehmt2	110147	ENSMUSG00000013787
ENSMUSG00000021281_Tnfaip2	0.7514	5.25706	3.29302	0.00338388	0.0339605	-2.56536	Tnfaip2	21928	ENSMUSG00000021281
ENSMUSG00000075273_Ttc30b	-0.47712	2.10859	-3.08742	0.005472	0.0465552	-2.56548	Ttc30b	72421	ENSMUSG00000075273
ENSMUSG00000036459_Wtip	0.655419	1.18359	2.99494	0.00677578	0.0536832	-2.56776	Wtip	101543	ENSMUSG00000036459
ENSMUSG00000022793_B4galt4	0.770194	0.927527	2.96908	0.00719083	0.0554954	-2.57101	B4galt4	56375	ENSMUSG00000022793
ENSMUSG00000089942_Pira2	1.07492	2.73406	3.14656	0.0047689	0.0427353	-2.57213	Pira2	18725	ENSMUSG00000089942
ENSMUSG00000052305_Hbb-bs	2.32555	6.76732	3.27919	0.00349579	0.0348208	-2.57275	Hbb-b1	15129	ENSMUSG00000052305
ENSMUSG00000060090_Rp2	0.520366	3.46606	3.19717	0.00423745	0.0397039	-2.58037	Rp2	19889	ENSMUSG00000060090
ENSMUSG00000034206_Polq	2.16465	-1.92843	2.83104	0.0098521	0.0679254	-2.58259	Polq	77782	ENSMUSG00000034206
ENSMUSG00000027347_Rasgrp1	1.3427	1.29673	2.99881	0.00671563	0.0534539	-2.58267	Rasgrp1	19419	ENSMUSG00000027347
ENSMUSG00000023990_Tfeb	0.466522	2.94148	3.14962	0.00473503	0.0425495	-2.5835	Tfeb	21425	ENSMUSG00000023990
ENSMUSG00000060671_Atp8b2	0.852535	1.5096	3.01555	0.00646156	0.0521313	-2.58489	Atp8b2	54667	ENSMUSG00000060671
ENSMUSG00000025608_Podxl	0.807108	2.76384	3.13332	0.00491827	0.0434425	-2.58966	Podxl	27205	ENSMUSG00000025608
ENSMUSG00000045930_Clec14a	-0.934208	3.71075	-3.20587	0.00415207	0.0390751	-2.59181	Clec14a	66864	ENSMUSG00000045930
ENSMUSG00000078317_F8a	-0.427319	3.06049	-3.16175	0.00460298	0.0416811	-2.59218	F8a	14070	ENSMUSG00000078317
ENSMUSG00000099146_0610031O16Rik	-0.52758	3.80534	-3.22362	0.00398298	0.0379512	-2.5929	0610031O16Rik	68369	ENSMUSG00000099146
ENSMUSG00000020580_Rock2	0.62028	4.02302	3.22886	0.00393431	0.0376258	-2.59394	Rock2	19878	ENSMUSG00000020580
ENSMUSG00000085995_Gm2788	-0.685347	4.30762	-3.25327	0.00371537	0.036242	-2.5961	Gm2788	108167326	ENSMUSG00000085995
ENSMUSG00000052821_Cysltr1	1.02912	-0.33225	2.85945	0.0092373	0.0651849	-2.59701	Cysltr1	58861	ENSMUSG00000052821
ENSMUSG00000027762_Sucnr1	-0.621908	4.9201	-3.27233	0.00355269	0.0351173	-2.59747	Sucnr1	84112	ENSMUSG00000027762
ENSMUSG00000051235_Gen1	1.07369	0.0841443	2.88805	0.0086552	0.0626824	-2.59776	Gen1	209334	ENSMUSG00000051235
ENSMUSG00000070372_Capza1	0.443957	5.21184	3.27815	0.00350435	0.0348792	-2.59952	Capza1	12340	ENSMUSG00000070372
ENSMUSG00000036887_C1qa	0.958989	6.87665	3.27626	0.00351995	0.0349807	-2.60821	C1qa	12259	ENSMUSG00000036887
ENSMUSG00000030793_Pycard	1.35594	1.86839	3.03735	0.00614455	0.0504224	-2.60875	Pycard	66824	ENSMUSG00000030793
ENSMUSG00000027200_Sema6d	0.84425	3.44555	3.17842	0.00442728	0.0408179	-2.61088	Sema6d	214968	ENSMUSG00000027200
ENSMUSG00000046417_Lrrc75a	0.911014	-0.73233	2.83483	0.00976792	0.067663	-2.61299	Lrrc75a	192976	ENSMUSG00000046417
ENSMUSG00000032122_Slc37a2	0.921777	1.47688	3.00494	0.00662154	0.0530912	-2.61308	Slc37a2	56857	ENSMUSG00000032122
ENSMUSG00000038437_Mllt6	0.536098	3.80578	3.20819	0.00412951	0.0389745	-2.6167	Mllt6	246198	ENSMUSG00000038437
ENSMUSG00000033721_Vav3	0.871255	-0.094006	2.8696	0.00902646	0.0643278	-2.62062	Vav3	57257	ENSMUSG00000033721
ENSMUSG00000042742_Bmt2	0.421269	3.09232	3.14555	0.00478016	0.0427474	-2.62263	Bmt2	101148	ENSMUSG00000042742
ENSMUSG00000072066_6720489N17Rik	1.37512	-1.22788	2.81289	0.0102654	0.069713	-2.62391	6720489N17Rik	211378	ENSMUSG00000072066
ENSMUSG00000042292_Mrtfa	0.596721	2.95475	3.12933	0.00496416	0.0436691	-2.62654	Mrtfa	223701	ENSMUSG00000042292
ENSMUSG00000028862_Map3k6	1.41718	-0.513838	2.82935	0.0098899	0.0680469	-2.62888	Map3k6	53608	ENSMUSG00000028862
ENSMUSG00000079015_Serpina1c	-0.510296	13.0043	-3.14435	0.00479352	0.0428078	-2.63144	Serpina1c	20702	ENSMUSG00000079015
ENSMUSG00000074813_Morrbid	0.958791	-0.103717	2.85767	0.00927469	0.0652458	-2.63428	Morrbid	100043424	ENSMUSG00000074813
ENSMUSG00000039197_Adk	-0.281727	8.67007	-3.23629	0.00386635	0.037251	-2.63436	Adk	11534	ENSMUSG00000039197
ENSMUSG00000107552_Gm44096	-1.39699	-0.952326	-2.81612	0.0101906	0.0694152	-2.63562	NA	NA	ENSMUSG00000107552
ENSMUSG00000022534_Mefv	1.61861	-0.803456	2.82029	0.010095	0.0690181	-2.63765	Mefv	54483	ENSMUSG00000022534
ENSMUSG00000037206_Islr	-0.730482	1.73703	-3.01643	0.00644841	0.0520912	-2.63952	Islr	26968	ENSMUSG00000037206
ENSMUSG00000039697_Ncoa7	1.27649	0.793143	2.92117	0.00802515	0.05962	-2.64069	Ncoa7	211329	ENSMUSG00000039697
ENSMUSG00000025001_Hells	1.90652	0.22882	2.88018	0.00881176	0.0634097	-2.6424	Hells	15201	ENSMUSG00000025001
ENSMUSG00000072980_Oip5	1.87634	-0.684319	2.82325	0.0100275	0.068722	-2.64259	Oip5	70645	ENSMUSG00000072980
ENSMUSG00000029553_Tfec	1.20822	1.13695	2.95536	0.00742093	0.056559	-2.64316	Tfec	21426	ENSMUSG00000029553
ENSMUSG00000047388_Atmin	0.510182	2.83119	3.11197	0.00516878	0.0447484	-2.64485	Atmin	234776	ENSMUSG00000047388
ENSMUSG00000040987_Mill2	-1.10728	-0.641181	-2.81826	0.0101414	0.0692624	-2.64618	Mill2	243864	ENSMUSG00000040987
ENSMUSG00000066684_Pilrb1	1.09484	1.67206	3.00647	0.00659819	0.0530354	-2.64743	Pilrb1	170741	ENSMUSG00000066684
ENSMUSG00000046010_Zfp830	-0.45461	2.50342	-3.0861	0.00548877	0.0466033	-2.65084	Zfp830	66983	ENSMUSG00000046010
ENSMUSG00000003873_Bax	0.469126	4.66011	3.23806	0.00385033	0.0371308	-2.65117	Bax	12028	ENSMUSG00000003873
ENSMUSG00000067916_Zfp991	1.5444	0.146467	2.85608	0.00930821	0.0653178	-2.65331	Zfp991	666532	ENSMUSG00000067916
ENSMUSG00000025486_Sirt3	-0.460628	6.02706	-3.26074	0.0036507	0.0358139	-2.66358	Sirt3	64384	ENSMUSG00000025486
ENSMUSG00000091649_Phf11b	1.53265	0.713409	2.90563	0.00831523	0.0608327	-2.66362	Phf11b	236451	ENSMUSG00000091649
ENSMUSG00000027222_Pex16	-0.421261	6.10491	-3.26073	0.00365081	0.0358139	-2.66367	Pex16	18633	ENSMUSG00000027222
ENSMUSG00000060044_Tmem26	1.23146	1.64517	2.99641	0.00675283	0.0536127	-2.66476	Tmem26	327766	ENSMUSG00000060044
ENSMUSG00000030867_Plk1	2.42408	0.557421	2.92962	0.00787159	0.0590115	-2.66523	Plk1	18817	ENSMUSG00000030867
ENSMUSG00000024164_C3	0.527942	12.5899	3.13991	0.00484341	0.043016	-2.66556	C3	12266	ENSMUSG00000024164
ENSMUSG00000037649_H2-DMa	1.30008	3.34176	3.14889	0.00474314	0.0425929	-2.66708	H2-DMa	14998	ENSMUSG00000037649
ENSMUSG00000042029_Ncapg2	1.25461	1.56875	2.99044	0.00684628	0.0540564	-2.66838	Ncapg2	76044	ENSMUSG00000042029
ENSMUSG00000002033_Cd3g	1.20355	-0.301078	2.83147	0.00984271	0.0679026	-2.66938	Cd3g	12502	ENSMUSG00000002033
ENSMUSG00000026032_Ndufb3	-0.496367	5.76824	-3.25617	0.00369011	0.0360628	-2.67199	Ndufb3	66495	ENSMUSG00000026032
ENSMUSG00000021038_Vipas39	0.416877	3.3435	3.14575	0.00477797	0.0427474	-2.6726	Vipas39	104799	ENSMUSG00000021038
ENSMUSG00000022843_Clcn2	-0.367113	4.75429	-3.23449	0.00388275	0.0373629	-2.6752	Clcn2	12724	ENSMUSG00000022843
ENSMUSG00000040410_Fbxl4	-0.393518	3.82782	-3.18548	0.00435485	0.0404816	-2.67542	Fbxl4	269514	ENSMUSG00000040410
ENSMUSG00000031504_Rab20	0.555264	3.34536	3.14346	0.00480355	0.0428678	-2.67695	Rab20	19332	ENSMUSG00000031504
ENSMUSG00000020399_Havcr2	1.71056	-1.84876	2.78167	0.0110146	0.0730304	-2.67888	Havcr2	171285	ENSMUSG00000020399
ENSMUSG00000028212_Ccne2	1.13114	0.508188	2.87536	0.00890895	0.0637712	-2.6789	Ccne2	12448	ENSMUSG00000028212
ENSMUSG00000097426_Gm8941	-0.7895	0.0810661	-2.85648	0.00929984	0.0653056	-2.67953	NA	NA	ENSMUSG00000097426
ENSMUSG00000026574_Dpt	-0.892214	1.90494	-3.00958	0.00655107	0.0527221	-2.67993	Dpt	56429	ENSMUSG00000026574
ENSMUSG00000071203_Naip5	1.03881	0.822693	2.90941	0.00824375	0.0605836	-2.68195	Naip5	17951	ENSMUSG00000071203
ENSMUSG00000066072_Cyp4a10	-1.16268	6.357	-3.24701	0.00377034	0.0366258	-2.68306	Cyp4a10	13117	ENSMUSG00000066072
ENSMUSG00000025894_Aasdhppt	-0.30742	4.85911	-3.23335	0.00389313	0.0373945	-2.68335	Aasdhppt	67618	ENSMUSG00000025894
ENSMUSG00000023827_Agpat4	0.939384	0.133999	2.85287	0.00937625	0.0656642	-2.68355	Agpat4	68262	ENSMUSG00000023827
ENSMUSG00000031762_Mt2	2.41445	3.00605	3.09107	0.00542585	0.0463758	-2.68404	Mt2	17750	ENSMUSG00000031762
ENSMUSG00000079043_Fastkd5	-0.413457	2.88487	-3.09978	0.00531721	0.0456782	-2.68431	Fastkd5	380601	ENSMUSG00000079043
ENSMUSG00000018899_Irf1	1.05592	4.84702	3.22803	0.00394202	0.0376659	-2.68481	Irf1	16362	ENSMUSG00000018899
ENSMUSG00000003824_Syce2	0.92163	0.23107	2.85568	0.00931673	0.065318	-2.68579	Syce2	71846	ENSMUSG00000003824
ENSMUSG00000041890_Git2	0.489807	3.17182	3.1244	0.00502152	0.0439944	-2.68712	Git2	26431	ENSMUSG00000041890
ENSMUSG00000061689_Dlgap4	0.399993	3.75792	3.16984	0.00451684	0.041214	-2.68881	Dlgap4	228836	ENSMUSG00000061689
ENSMUSG00000053580_Tanc2	0.709199	1.94931	3.00514	0.00661852	0.0530912	-2.6936	Tanc2	77097	ENSMUSG00000053580
ENSMUSG00000000184_Ccnd2	0.646092	3.01295	3.10351	0.00527132	0.0453846	-2.69386	Ccnd2	12444	ENSMUSG00000000184
ENSMUSG00000004473_Clec11a	-0.571017	0.951231	-2.91657	0.00810996	0.0599748	-2.69435	Clec11a	20256	ENSMUSG00000004473
ENSMUSG00000030731_Syt3	-0.567632	1.75269	-2.99944	0.006706	0.0534539	-2.6949	Syt3	20981	ENSMUSG00000030731
ENSMUSG00000028796_Phc2	0.36726	5.0232	3.23197	0.00390575	0.037408	-2.6953	Phc2	54383	ENSMUSG00000028796
ENSMUSG00000057058_Skap1	1.72744	-0.988413	2.78242	0.010996	0.0729818	-2.69587	Skap1	78473	ENSMUSG00000057058
ENSMUSG00000033610_Pank1	-0.378615	7.20622	-3.23351	0.00389167	0.0373945	-2.70054	Pank1	75735	ENSMUSG00000033610
ENSMUSG00000029730_Mcm7	0.751063	4.14251	3.18014	0.00440948	0.0407522	-2.70424	Mcm7	17220	ENSMUSG00000029730
ENSMUSG00000038663_Fsd2	2.19552	-1.66895	2.7629	0.01149	0.0750295	-2.7049	Fsd2	244091	ENSMUSG00000038663
ENSMUSG00000041975_Mettl8	-0.379168	3.0832	-3.11303	0.00515596	0.0447484	-2.70507	Mettl8	228019	ENSMUSG00000041975
ENSMUSG00000001768_Rin2	0.455219	3.72397	3.16066	0.00461471	0.041729	-2.70856	Rin2	74030	ENSMUSG00000001768
ENSMUSG00000036256_Igfbp7	-0.421765	6.31275	-3.23902	0.00384168	0.0371238	-2.70967	Igfbp7	29817	ENSMUSG00000036256
ENSMUSG00000022070_Bora	1.40285	-0.250242	2.80122	0.0105396	0.0708236	-2.71003	Bora	77744	ENSMUSG00000022070
ENSMUSG00000027809_Etfdh	-0.348606	7.46573	-3.22434	0.00397626	0.037915	-2.71079	Etfdh	66841	ENSMUSG00000027809
ENSMUSG00000049307_Fut4	1.33317	-1.03051	2.77226	0.0112505	0.0741388	-2.71173	Fut4	14345	ENSMUSG00000049307
ENSMUSG00000022210_Dhrs4	-0.350132	6.81785	-3.23307	0.00389568	0.0373945	-2.71361	Dhrs4	28200	ENSMUSG00000022210
ENSMUSG00000024507_Hsd17b4	-0.350882	8.35208	-3.20738	0.00413734	0.03902	-2.7139	Hsd17b4	15488	ENSMUSG00000024507
ENSMUSG00000073409_H2-Q6	0.676185	5.78318	3.23438	0.00388373	0.0373629	-2.71434	H2-Q6	110557	ENSMUSG00000073409
ENSMUSG00000022978_Mis18a	0.851919	1.28357	2.93543	0.00776764	0.0584786	-2.71789	Mis18a	66578	ENSMUSG00000022978
ENSMUSG00000048852_Gm12185	2.04141	-1.4691	2.7556	0.0116799	0.0758408	-2.72171	Gm12185	620913	ENSMUSG00000048852
ENSMUSG00000021720_Rnf180	1.20953	-0.530043	2.78795	0.0108598	0.0723375	-2.72486	Rnf180	71816	ENSMUSG00000021720
ENSMUSG00000074768_Bhmt	-0.518594	11.5663	-3.13101	0.00494478	0.0435874	-2.72565	Bhmt	12116	ENSMUSG00000074768
ENSMUSG00000047250_Ptgs1	1.14472	4.17198	3.17206	0.00449352	0.0411368	-2.72688	Ptgs1	19224	ENSMUSG00000047250
ENSMUSG00000027333_Smox	0.732294	1.71816	2.96345	0.00728433	0.0559791	-2.72752	Smox	228608	ENSMUSG00000027333
ENSMUSG00000027452_Acss1	1.53177	-1.04891	2.76552	0.0114225	0.0747395	-2.72983	Acss1	68738	ENSMUSG00000027452
ENSMUSG00000029776_Hibadh	-0.315722	8.24205	-3.20252	0.00418468	0.0392947	-2.73076	Hibadh	58875	ENSMUSG00000029776
ENSMUSG00000079442_St6galnac4	1.10225	1.40812	2.93608	0.00775598	0.0584786	-2.73169	St6galnac4	20448	ENSMUSG00000079442
ENSMUSG00000005907_Pex1	-0.35833	4.30994	-3.18556	0.00435401	0.0404816	-2.73684	Pex1	71382	ENSMUSG00000005907
ENSMUSG00000037408_Cnnm4	0.557368	1.66115	2.95654	0.00740079	0.0565052	-2.73725	Cnnm4	94220	ENSMUSG00000037408
ENSMUSG00000026955_Sapcd2	2.11678	-2.55542	2.74766	0.0118902	0.0767322	-2.73752	Sapcd2	72080	ENSMUSG00000026955
ENSMUSG00000006281_Tep1	0.612921	4.01613	3.16354	0.00458373	0.0416232	-2.73859	Tep1	21745	ENSMUSG00000006281
ENSMUSG00000059325_Hopx	-0.58342	5.14922	-3.21642	0.0040507	0.0383986	-2.7416	Hopx	74318	ENSMUSG00000059325
ENSMUSG00000009905_Kdsr	-0.300556	4.09102	-3.17155	0.00449886	0.0411368	-2.74189	Kdsr	70750	ENSMUSG00000009905
ENSMUSG00000024621_Csf1r	1.01243	6.62373	3.21565	0.00405803	0.0384118	-2.74494	Csf1r	12978	ENSMUSG00000024621
ENSMUSG00000036986_Pml	0.489009	4.3179	3.17634	0.00444881	0.0408565	-2.75017	Pml	18854	ENSMUSG00000036986
ENSMUSG00000008193_Spib	1.03893	-0.844463	2.75364	0.0117317	0.075995	-2.75261	Spib	272382	ENSMUSG00000008193
ENSMUSG00000078502_Zfp268	1.71618	-0.523707	2.76955	0.0113195	0.0743261	-2.75439	Gm13212	433801	ENSMUSG00000078502
ENSMUSG00000031897_Psmb10	0.720804	5.59705	3.21503	0.00406388	0.0384391	-2.75559	Psmb10	19171	ENSMUSG00000031897
ENSMUSG00000024235_Map3k8	1.18944	1.1345	2.89927	0.00843668	0.0614435	-2.7557	Map3k8	26410	ENSMUSG00000024235
ENSMUSG00000031266_Gla	0.456464	2.68012	3.04747	0.00600241	0.049538	-2.75577	Gla	11605	ENSMUSG00000031266
ENSMUSG00000040945_Rcc2	0.401485	5.06899	3.20536	0.00415696	0.0390911	-2.75592	Rcc2	108911	ENSMUSG00000040945
ENSMUSG00000031594_Fgl1	0.921951	8.64261	3.18454	0.00436439	0.0405122	-2.75721	Fgl1	234199	ENSMUSG00000031594
ENSMUSG00000026970_Rbms1	0.58984	4.34336	3.17338	0.00447966	0.0410524	-2.76164	Rbms1	56878	ENSMUSG00000026970
ENSMUSG00000020898_Ctc1	0.531218	2.77062	3.0502	0.00596468	0.0492895	-2.76256	Ctc1	68964	ENSMUSG00000020898
ENSMUSG00000047638_Nr1h4	-0.412377	6.19201	-3.21598	0.00405488	0.0384102	-2.76435	Nr1h4	20186	ENSMUSG00000047638
ENSMUSG00000029822_Osbpl3	1.02347	0.304589	2.82312	0.0100305	0.068722	-2.76497	Osbpl3	71720	ENSMUSG00000029822
ENSMUSG00000033788_Dysf	0.914813	2.40502	3.01288	0.00650144	0.0523878	-2.76562	Dysf	26903	ENSMUSG00000033788
ENSMUSG00000006411_Nectin4	1.47471	-1.33309	2.72869	0.0124068	0.07894	-2.77227	Nectin4	71740	ENSMUSG00000006411
ENSMUSG00000105987_AI506816	0.865555	3.45677	3.10244	0.00528441	0.045467	-2.77374	AI506816	433855	ENSMUSG00000105987
ENSMUSG00000001588_Acap1	0.91171	0.745423	2.84741	0.00949335	0.066305	-2.77726	Acap1	216859	ENSMUSG00000001588
ENSMUSG00000053835_H2-T24	0.63858	1.40916	2.9216	0.00801731	0.05962	-2.77781	H2-T24	15042	ENSMUSG00000053835
ENSMUSG00000033581_Igf2bp2	1.425	0.753772	2.83973	0.0096601	0.0671797	-2.78393	Igf2bp2	319765	ENSMUSG00000033581
ENSMUSG00000046020_Pofut1	0.362666	4.04714	3.14588	0.00477649	0.0427474	-2.78421	Pofut1	140484	ENSMUSG00000046020
ENSMUSG00000051853_Arf3	0.444576	5.80898	3.20213	0.00418849	0.039302	-2.7912	Arf3	11842	ENSMUSG00000051853
ENSMUSG00000031706_Rfx1	0.578177	2.40826	2.99798	0.00672845	0.0535177	-2.8052	Rfx1	19724	ENSMUSG00000031706
ENSMUSG00000026222_Sp100	0.821873	3.17593	3.06959	0.00570282	0.0477212	-2.80521	Sp100	20684	ENSMUSG00000026222
ENSMUSG00000044734_Serpinb1a	-0.977901	1.25816	-2.90026	0.00841774	0.0613746	-2.80599	Serpinb1a	66222	ENSMUSG00000044734
ENSMUSG00000032382_Snx1	0.366253	4.11231	3.14076	0.00483381	0.043016	-2.806	Snx1	56440	ENSMUSG00000032382
ENSMUSG00000032320_Rcn2	0.503927	3.37402	3.08234	0.00553686	0.0467995	-2.80941	Rcn2	26611	ENSMUSG00000032320
ENSMUSG00000030589_Rasgrp4	1.69641	-1.81121	2.70341	0.0131282	0.0825231	-2.81	Rasgrp4	233046	ENSMUSG00000030589
ENSMUSG00000053310_Nrgn	1.3843	0.703332	2.81724	0.0101647	0.0693484	-2.81167	Nrgn	64011	ENSMUSG00000053310
ENSMUSG00000029372_Ppbp	1.20623	-0.0034097	2.77264	0.011241	0.0741141	-2.81318	Ppbp	57349	ENSMUSG00000029372
ENSMUSG00000073902_Gvin3	1.37036	0.961719	2.86683	0.00908364	0.0645931	-2.81444	NA	NA	ENSMUSG00000073902
ENSMUSG00000032554_Trf	0.371765	14.1406	3.0383	0.00613107	0.0504071	-2.81741	Trf	22041	ENSMUSG00000032554
ENSMUSG00000112937_Gm17746	2.71552	-2.11031	2.69851	0.0132727	0.082948	-2.81839	NA	NA	ENSMUSG00000112937
ENSMUSG00000086316_Nbdy	0.680329	1.12629	2.86389	0.00914442	0.0648828	-2.82043	Nbdy	70123	ENSMUSG00000086316
ENSMUSG00000021993_Mipep	-0.297201	5.00779	-3.17702	0.00444174	0.0408495	-2.82118	Mipep	70478	ENSMUSG00000021993
ENSMUSG00000062515_Fabp4	0.873329	3.86936	3.10993	0.00519326	0.0448616	-2.82219	Fabp4	11770	ENSMUSG00000062515
ENSMUSG00000032449_Slc25a36	0.874787	1.53831	2.90598	0.00830847	0.0608177	-2.82543	Slc25a36	192287	ENSMUSG00000032449
ENSMUSG00000021493_Pdlim7	0.540974	2.59139	3.0019	0.00666801	0.0533186	-2.82665	Pdlim7	67399	ENSMUSG00000021493
ENSMUSG00000003662_Ciao1	-0.26304	5.29802	-3.18007	0.00441024	0.0407522	-2.82885	Ciao1	26371	ENSMUSG00000003662
ENSMUSG00000021186_Fbln5	-0.666664	2.45209	-2.98962	0.00685917	0.0541248	-2.82906	Fbln5	23876	ENSMUSG00000021186
ENSMUSG00000031871_Cdh5	0.847345	4.85467	3.16104	0.00461057	0.0417207	-2.83007	Cdh5	12562	ENSMUSG00000031871
ENSMUSG00000026621_Mtarc1	-0.442472	8.73585	-3.14753	0.0047582	0.042697	-2.83072	Mtarc1	66112	ENSMUSG00000026621
ENSMUSG00000055994_Nod2	1.67937	-1.51196	2.69254	0.0134506	0.0837769	-2.83117	Nod2	257632	ENSMUSG00000055994
ENSMUSG00000001128_Cfp	1.10786	5.76106	3.17644	0.00444778	0.0408565	-2.83401	Cfp	18636	ENSMUSG00000001128
ENSMUSG00000027951_Adar	0.448082	4.31697	3.14006	0.00484167	0.043016	-2.83602	Adar	56417	ENSMUSG00000027951
ENSMUSG00000017929_B4galt5	0.559789	4.4515	3.1388	0.00485595	0.0430683	-2.84851	B4galt5	56336	ENSMUSG00000017929
ENSMUSG00000104713_Gbp6	1.34433	4.98973	3.15759	0.00464782	0.0419405	-2.84871	Gbp6	100702	ENSMUSG00000104713
ENSMUSG00000090164_BC035044	1.52249	-0.104035	2.75161	0.0117851	0.0762644	-2.8496	BC035044	232406	ENSMUSG00000090164
ENSMUSG00000007815_Rhoa	0.315571	7.12028	3.16874	0.00452845	0.0412514	-2.84974	Rhoa	11848	ENSMUSG00000007815
ENSMUSG00000062593_Gm49339	2.25254	0.309208	2.83292	0.00981036	0.0677615	-2.85154	Lilrb4a	14728	ENSMUSG00000062593
ENSMUSG00000029470_P2rx4	0.363718	5.69007	3.17453	0.00446766	0.0409715	-2.85274	P2rx4	18438	ENSMUSG00000029470
ENSMUSG00000049600_Zbtb45	0.781075	1.71005	2.90104	0.00840276	0.0613255	-2.85275	Zbtb45	232879	ENSMUSG00000049600
ENSMUSG00000021259_Cyp46a1	-0.947637	-0.501368	-2.72643	0.0124696	0.0791905	-2.85362	Cyp46a1	13116	ENSMUSG00000021259
ENSMUSG00000078495_Zfp984	0.702136	1.29031	2.86593	0.0091022	0.0646867	-2.85446	Zfp984	100041677	ENSMUSG00000078495
ENSMUSG00000026979_Psd4	0.803495	2.2252	2.95659	0.00739988	0.0565052	-2.8568	Psd4	215632	ENSMUSG00000026979
ENSMUSG00000051730_Mettl5	-0.537268	3.39911	-3.06882	0.00571306	0.047728	-2.85823	Mettl5	75422	ENSMUSG00000051730
ENSMUSG00000014599_Csf1	0.513225	3.3114	3.05681	0.00587421	0.0487285	-2.86318	Csf1	12977	ENSMUSG00000014599
ENSMUSG00000024764_Naa40	0.498479	3.25891	3.04913	0.00597945	0.0493801	-2.86599	Naa40	70999	ENSMUSG00000024764
ENSMUSG00000035673_Sbno2	0.500854	4.22637	3.1219	0.00505079	0.04419	-2.86638	Sbno2	216161	ENSMUSG00000035673
ENSMUSG00000051627_H1f4	-1.09973	-0.543082	-2.72962	0.0123809	0.0788979	-2.86717	H1f4	50709	ENSMUSG00000051627
ENSMUSG00000021384_Susd3	1.5614	-1.68627	2.67287	0.0140528	0.0862827	-2.86742	Susd3	66329	ENSMUSG00000021384
ENSMUSG00000032577_Mapkapk3	0.617179	2.33127	2.96428	0.0072706	0.0559199	-2.87059	Mapkapk3	102626	ENSMUSG00000032577
ENSMUSG00000026134_Prim2	0.599903	1.46384	2.87271	0.00896283	0.0640153	-2.87175	Prim2	19076	ENSMUSG00000026134
ENSMUSG00000079363_Gbp4	1.37875	2.49171	2.97412	0.00710812	0.0552811	-2.87184	Gbp4	17472	ENSMUSG00000079363
ENSMUSG00000038156_Spon1	1.13094	-0.588974	2.70977	0.012943	0.0815565	-2.8724	Spon1	233744	ENSMUSG00000038156
ENSMUSG00000028793_Rnf19b	0.435008	4.93085	3.15012	0.00472952	0.0425295	-2.87245	Rnf19b	75234	ENSMUSG00000028793
ENSMUSG00000061718_Ppp1r1b	-0.756032	2.45056	-2.97595	0.00707833	0.0552485	-2.87317	Ppp1r1b	19049	ENSMUSG00000061718
ENSMUSG00000001473_Tubb6	0.969059	3.62339	3.06342	0.00578494	0.0481746	-2.87905	Tubb6	67951	ENSMUSG00000001473
ENSMUSG00000060121_Gemin2	-0.45627	3.07358	-3.02898	0.00626436	0.0509078	-2.88069	Gemin2	66603	ENSMUSG00000060121
ENSMUSG00000043131_Mob1a	0.42625	5.42419	3.15776	0.00464601	0.0419405	-2.88201	Mob1a	232157	ENSMUSG00000043131
ENSMUSG00000047139_Cd24a	0.727015	1.49793	2.87832	0.00884922	0.0635544	-2.88252	Cd24a	12484	ENSMUSG00000047139
ENSMUSG00000030170_Wnt5b	-0.745054	2.41567	-2.96905	0.00719138	0.0554954	-2.8826	Wnt5b	22419	ENSMUSG00000030170
ENSMUSG00000039990_Edrf1	-0.403778	3.63859	-3.07535	0.00562732	0.0472863	-2.8854	Edrf1	214764	ENSMUSG00000039990
ENSMUSG00000015112_Slc25a13	-0.345408	7.06684	-3.15236	0.00470493	0.0423378	-2.88618	Slc25a13	50799	ENSMUSG00000015112
ENSMUSG00000022504_Ciita	1.32859	1.51712	2.8914	0.00858947	0.062276	-2.8866	Ciita	12265	ENSMUSG00000022504
ENSMUSG00000052248_Zeb2os	1.34937	-0.0253339	2.72149	0.0126083	0.0798361	-2.89	Zeb2os	433424	ENSMUSG00000052248
ENSMUSG00000038141_Tmem181a	0.582982	2.09107	2.92753	0.0079092	0.0591659	-2.8919	Tmem181a	77106	ENSMUSG00000038141
ENSMUSG00000041870_Ankrd13a	0.387763	4.45956	3.12162	0.00505409	0.04419	-2.89193	Ankrd13a	68420	ENSMUSG00000041870
ENSMUSG00000071379_Hpcal1	0.834184	3.62873	3.06311	0.00578914	0.0481771	-2.89899	Hpcal1	53602	ENSMUSG00000071379
ENSMUSG00000062014_Gmfb	0.321489	4.63806	3.12686	0.00499283	0.0438473	-2.89911	Gmfb	63985	ENSMUSG00000062014
ENSMUSG00000064090_Vrk2	0.770681	2.60215	2.96907	0.00719107	0.0554954	-2.8998	Vrk2	69922	ENSMUSG00000064090
ENSMUSG00000027067_Ssrp1	0.306683	5.48684	3.14724	0.00476133	0.042697	-2.90777	Ssrp1	20833	ENSMUSG00000027067
ENSMUSG00000074115_Saa1	2.24523	8.95557	3.11288	0.0051578	0.0447484	-2.90894	Saa1	20208	ENSMUSG00000074115
ENSMUSG00000063458_Lrmda	1.10997	-0.426863	2.69144	0.0134837	0.0838618	-2.91669	Lrmda	76633	ENSMUSG00000063458
ENSMUSG00000021338_Carmil1	-0.538376	3.38108	-3.03936	0.00611608	0.0503365	-2.91676	Carmil1	68732	ENSMUSG00000021338
ENSMUSG00000022443_Myh9	0.681245	6.84349	3.14032	0.00483872	0.043016	-2.91936	Myh9	17886	ENSMUSG00000022443
ENSMUSG00000042423_Fbrs	0.36324	4.04954	3.08661	0.00548222	0.0465809	-2.9195	Fbrs	14123	ENSMUSG00000042423
ENSMUSG00000078606_Gvin2	1.58665	4.02149	3.08355	0.00552134	0.0467442	-2.92124	Gvin2	100042856	ENSMUSG00000078606
ENSMUSG00000051669_AU021092	-0.944433	0.201087	-2.73782	0.0121556	0.0778953	-2.92174	AU021092	239691	ENSMUSG00000051669
ENSMUSG00000023800_Tiam2	-0.557497	2.82877	-2.9917	0.00682642	0.0539654	-2.92362	Tiam2	24001	ENSMUSG00000023800
ENSMUSG00000015474_Ppt2	0.321401	5.22779	3.13475	0.00490194	0.0433278	-2.92527	Ppt2	54397	ENSMUSG00000015474
ENSMUSG00000022324_Matn2	0.739514	1.05462	2.80469	0.0104573	0.0705639	-2.92529	Matn2	17181	ENSMUSG00000022324
ENSMUSG00000075010_AW112010	0.90221	6.74113	3.13835	0.00486097	0.0430833	-2.92624	AW112010	107350	ENSMUSG00000075010
ENSMUSG00000051225_Fam83a	1.17754	-0.134189	2.70066	0.0132092	0.0828128	-2.92641	Fam83a	239463	ENSMUSG00000051225
ENSMUSG00000032479_Map4	0.336383	5.41244	3.13628	0.00488456	0.0432627	-2.92823	Map4	17758	ENSMUSG00000032479
ENSMUSG00000112129_Pbld1	-0.307212	6.96149	-3.13496	0.0048996	0.0433278	-2.9283	Pbld1	68371	ENSMUSG00000112129
ENSMUSG00000019810_Fuca2	0.754476	3.42888	3.03235	0.0062158	0.0507493	-2.92832	Fuca2	66848	ENSMUSG00000019810
ENSMUSG00000029723_Tsc22d4	0.467231	3.9225	3.07139	0.00567915	0.0475675	-2.92838	Tsc22d4	78829	ENSMUSG00000029723
ENSMUSG00000015357_Clpx	-0.444124	7.75656	-3.11984	0.00507499	0.0442831	-2.93253	Clpx	270166	ENSMUSG00000015357
ENSMUSG00000018040_Rrp7a	0.313609	4.69875	3.1122	0.00516595	0.0447484	-2.93577	Rrp7a	74778	ENSMUSG00000018040
ENSMUSG00000027597_Ahcy	-0.413461	10.5093	-3.05837	0.00585295	0.0485833	-2.9363	Ahcy	269378	ENSMUSG00000027597
ENSMUSG00000024533_Spire1	0.817351	-0.574665	2.67228	0.0140712	0.0863544	-2.93644	Spire1	68166	ENSMUSG00000024533
ENSMUSG00000049091_Sephs2	-0.342209	9.67519	-3.07784	0.0055949	0.0471669	-2.93684	Sephs2	20768	ENSMUSG00000049091
ENSMUSG00000015749_Anp32e	0.467335	4.48008	3.1005	0.00530836	0.0456427	-2.93693	Anp32e	66471	ENSMUSG00000015749
ENSMUSG00000030187_Klra2	1.20861	2.07881	2.91829	0.00807816	0.0599333	-2.9377	Klra2	16633	ENSMUSG00000030187
ENSMUSG00000020230_Prmt2	0.791601	0.0491018	2.71206	0.012877	0.0812195	-2.93879	Prmt2	15468	ENSMUSG00000020230
ENSMUSG00000024424_Ttc39c	-0.487347	8.41047	-3.10386	0.005267	0.0453775	-2.94136	Ttc39c	72747	ENSMUSG00000024424
ENSMUSG00000009035_Tmem184b	0.329924	4.45806	3.09689	0.005353	0.0458136	-2.94316	Tmem184b	223693	ENSMUSG00000009035
ENSMUSG00000036880_Acaa2	-0.365862	9.5264	-3.07813	0.00559109	0.0471655	-2.94422	Acaa2	52538	ENSMUSG00000036880
ENSMUSG00000040699_Limd2	0.70475	4.19938	3.07838	0.00558792	0.0471655	-2.9454	Limd2	67803	ENSMUSG00000040699
ENSMUSG00000027261_Hao1	-0.449854	7.96028	-3.11131	0.00517671	0.0447484	-2.9454	Hao1	15112	ENSMUSG00000027261
ENSMUSG00000035780_Ugt2a3	-0.353086	7.61781	-3.11737	0.00510431	0.044449	-2.94582	Ugt2a3	72094	ENSMUSG00000035780
ENSMUSG00000078920_Ifi47	0.976125	5.72183	3.12991	0.00495751	0.0436536	-2.9464	Ifi47	15953	ENSMUSG00000078920
ENSMUSG00000054764_Mtnr1a	-1.13542	-0.289697	-2.69258	0.0134495	0.0837769	-2.94742	Mtnr1a	17773	ENSMUSG00000054764
ENSMUSG00000028048_Gba	0.397306	4.5581	3.09779	0.00534185	0.0457628	-2.94943	Gba	14466	ENSMUSG00000028048
ENSMUSG00000058163_Gm5431	0.983371	0.732858	2.77101	0.0112822	0.0742192	-2.94944	Gm5431	432555	ENSMUSG00000058163
ENSMUSG00000037306_Man1c1	0.900444	2.08094	2.8964	0.00849206	0.0617773	-2.96075	Man1c1	230815	ENSMUSG00000037306
ENSMUSG00000028497_Hacd4	1.32289	1.86024	2.87715	0.00887288	0.0636537	-2.96088	Hacd4	66775	ENSMUSG00000028497
ENSMUSG00000062181_Ces3b	-0.507193	8.7676	-3.08704	0.00547679	0.0465653	-2.96089	Ces3b	13909	ENSMUSG00000062181
ENSMUSG00000029135_Fosl2	0.779282	2.97207	2.98006	0.00701172	0.0548609	-2.96148	Fosl2	14284	ENSMUSG00000029135
ENSMUSG00000066839_Ecsit	-0.375908	5.13968	-3.11769	0.00510049	0.0444456	-2.96157	Ecsit	26940	ENSMUSG00000066839
ENSMUSG00000029718_Pcolce	0.545754	3.60852	3.02882	0.00626666	0.0509078	-2.96369	Pcolce	18542	ENSMUSG00000029718
ENSMUSG00000028976_Slc2a5	-0.738903	1.8159	-2.87595	0.00889706	0.0637212	-2.96573	Slc2a5	56485	ENSMUSG00000028976
ENSMUSG00000032602_Slc25a20	-0.42119	6.33553	-3.12544	0.00500933	0.0439173	-2.96602	Slc25a20	57279	ENSMUSG00000032602
ENSMUSG00000001281_Itgb7	1.24061	1.66021	2.85334	0.00936635	0.0656303	-2.96624	Itgb7	16421	ENSMUSG00000001281
ENSMUSG00000029687_Ezh2	0.799363	2.03431	2.88541	0.00870757	0.0629561	-2.96822	Ezh2	14056	ENSMUSG00000029687
ENSMUSG00000053303_Slc22a26	2.14993	-0.233481	2.64298	0.0150172	0.0909108	-2.9731	Slc22a26	236149	ENSMUSG00000053303
ENSMUSG00000099707_Gm8883	-0.482963	2.95414	-2.97516	0.00709116	0.0552757	-2.9757	Gm8883	667931	ENSMUSG00000099707
ENSMUSG00000051256_Jagn1	-0.335733	4.55432	-3.08828	0.00546109	0.0464929	-2.97741	Jagn1	67767	ENSMUSG00000051256
ENSMUSG00000021257_Angel1	-0.495874	2.14743	-2.89559	0.00850781	0.0618225	-2.97815	Angel1	68737	ENSMUSG00000021257
ENSMUSG00000003948_Mmd	-0.356083	6.68429	-3.11576	0.00512343	0.0445257	-2.9802	Mmd	67468	ENSMUSG00000003948
ENSMUSG00000022432_Smc1b	1.20794	-0.831459	2.63592	0.0152538	0.0918279	-2.98371	Smc1b	140557	ENSMUSG00000022432
ENSMUSG00000056211_R3hdm1	0.317462	3.69284	3.03308	0.00620533	0.0506958	-2.98455	R3hdm1	226412	ENSMUSG00000056211
ENSMUSG00000027550_Lrrcc1	0.628879	0.656278	2.74067	0.0120781	0.0776172	-2.9871	Lrrcc1	71710	ENSMUSG00000027550
ENSMUSG00000032400_Zwilch	1.57893	0.0194222	2.69888	0.0132618	0.082948	-2.98766	Zwilch	68014	ENSMUSG00000032400
ENSMUSG00000029269_Sult1b1	-0.590166	4.33577	-3.07171	0.0056749	0.0475626	-2.98806	Sult1b1	56362	ENSMUSG00000029269
ENSMUSG00000028465_Tln1	0.68336	6.22223	3.11251	0.00516222	0.0447484	-2.99124	Tln1	21894	ENSMUSG00000028465
ENSMUSG00000019843_Fyn	0.664982	3.1519	2.98526	0.00692837	0.0545052	-2.99141	Fyn	14360	ENSMUSG00000019843
ENSMUSG00000027331_Knstrn	1.69939	0.898731	2.80313	0.0104942	0.0706655	-2.99343	Knstrn	51944	ENSMUSG00000027331
ENSMUSG00000046031_Calhm6	1.20407	1.95235	2.86707	0.0090786	0.0645931	-2.99424	Calhm6	215900	ENSMUSG00000046031
ENSMUSG00000015966_Il17rb	0.580059	2.94869	2.95856	0.00736654	0.0563688	-2.9948	Il17rb	50905	ENSMUSG00000015966
ENSMUSG00000028261_Ndufaf4	-0.429191	4.69034	-3.08535	0.00549831	0.0466258	-2.99742	Ndufaf4	68493	ENSMUSG00000028261
ENSMUSG00000020661_Dnmt3a	0.770896	3.66251	3.02158	0.00637238	0.0516047	-2.9975	Dnmt3a	13435	ENSMUSG00000020661
ENSMUSG00000005763_Cd247	1.5419	-1.06679	2.61041	0.0161385	0.0950463	-3.00196	Cd247	12503	ENSMUSG00000005763
ENSMUSG00000097224_Gm26716	1.44907	-1.34739	2.60085	0.0164823	0.0965306	-3.00639	NA	NA	ENSMUSG00000097224
ENSMUSG00000038462_Uqcrfs1	-0.337422	7.84673	-3.08584	0.00549205	0.0466033	-3.00722	Uqcrfs1	66694	ENSMUSG00000038462
ENSMUSG00000048807_Slc35e4	1.09801	-0.960179	2.62187	0.0157351	0.0936611	-3.00814	Slc35e4	103710	ENSMUSG00000048807
ENSMUSG00000026179_Pnkd	-0.351271	6.94467	-3.09808	0.00533825	0.0457628	-3.01108	Pnkd	56695	ENSMUSG00000026179
ENSMUSG00000004880_Lbr	0.499724	3.49454	2.9989	0.00671433	0.0534539	-3.01241	Lbr	98386	ENSMUSG00000004880
ENSMUSG00000078675_Mup16	-2.03312	3.90322	-3.03445	0.00618583	0.0506264	-3.01311	Mup13	100039089	ENSMUSG00000078675
ENSMUSG00000059482_2610301B20Rik	-0.503081	1.94884	-2.85672	0.00929481	0.0653056	-3.01441	2610301B20Rik	67157	ENSMUSG00000059482
ENSMUSG00000070427_Il18bp	1.13244	4.49918	3.05434	0.00590776	0.0489754	-3.0155	Il18bp	16068	ENSMUSG00000070427
ENSMUSG00000024654_Asrgl1	-0.348474	3.38288	-2.99478	0.00677828	0.0536832	-3.01607	Asrgl1	66514	ENSMUSG00000024654
ENSMUSG00000075415_Fnbp1	0.493729	3.76069	3.02289	0.00635308	0.0515129	-3.01663	Fnbp1	14269	ENSMUSG00000075415
ENSMUSG00000078945_Naip2	0.751944	2.55333	2.91404	0.00815706	0.0602109	-3.01831	Naip2	17948	ENSMUSG00000078945
ENSMUSG00000055413_H2-Q5	0.776924	1.45547	2.80165	0.0105292	0.070804	-3.01874	H2-Q5	15016	ENSMUSG00000055413
ENSMUSG00000028108_Ecm1	-0.458211	6.60416	-3.09765	0.00534353	0.0457628	-3.02274	Ecm1	13601	ENSMUSG00000028108
ENSMUSG00000024472_Dcp2	0.533436	3.73256	3.01643	0.00644854	0.0520912	-3.02419	Dcp2	70640	ENSMUSG00000024472
ENSMUSG00000022043_Trim35	0.814623	2.32249	2.88769	0.00866239	0.0626994	-3.02432	Trim35	66854	ENSMUSG00000022043
ENSMUSG00000020097_Sgpl1	0.298472	6.19369	3.09959	0.00531954	0.0456782	-3.02452	Sgpl1	20397	ENSMUSG00000020097
ENSMUSG00000042745_Id1	1.02934	3.28284	2.9698	0.00717891	0.0554954	-3.02994	Id1	15901	ENSMUSG00000042745
ENSMUSG00000032643_Fhl3	1.3134	-0.82804	2.61088	0.016122	0.0950463	-3.03036	Fhl3	14201	ENSMUSG00000032643
ENSMUSG00000037321_Tap1	0.89236	5.50661	3.08888	0.00545343	0.0464794	-3.03352	Tap1	21354	ENSMUSG00000037321
ENSMUSG00000032357_Tinag	2.5541	-3.05009	2.59663	0.0166363	0.0971687	-3.03433	Tinag	26944	ENSMUSG00000032357
ENSMUSG00000037916_Ndufv1	-0.359536	7.27121	-3.08313	0.00552671	0.0467442	-3.03447	Ndufv1	17995	ENSMUSG00000037916
ENSMUSG00000040112_Mrps35	-0.409712	4.70633	-3.06944	0.00570487	0.0477212	-3.0351	Mrps35	232536	ENSMUSG00000040112
ENSMUSG00000062524_Ncr1	1.9068	-1.68286	2.57288	0.0175282	0.100832	-3.03679	Ncr1	17086	ENSMUSG00000062524
ENSMUSG00000039899_Fgl2	1.53975	3.09952	2.95703	0.00739246	0.0565052	-3.03767	Fgl2	14190	ENSMUSG00000039899
ENSMUSG00000079339_Ifit1bl1	1.47372	-0.959067	2.59305	0.0167681	0.0976746	-3.03962	Ifit1bl1	667373	ENSMUSG00000079339
ENSMUSG00000026489_Coq8a	-0.444927	9.01137	-3.04062	0.00609824	0.0502648	-3.05301	Coq8a	67426	ENSMUSG00000026489
ENSMUSG00000037466_Tedc1	2.05202	-1.3354	2.59755	0.0166026	0.0970156	-3.05326	Tedc1	104732	ENSMUSG00000037466
ENSMUSG00000014361_Mertk	0.79576	3.51809	2.98386	0.0069507	0.0545178	-3.05513	Mertk	17289	ENSMUSG00000014361
ENSMUSG00000031925_Maml2	0.737127	0.464018	2.68989	0.0135302	0.0841108	-3.05528	Maml2	270118	ENSMUSG00000031925
ENSMUSG00000037525_Bcdin3d	0.394332	1.64245	2.80388	0.0104764	0.0706554	-3.05532	Bcdin3d	75284	ENSMUSG00000037525
ENSMUSG00000041431_Ccnb1	2.20329	0.91089	2.77122	0.0112769	0.0742192	-3.05593	Ccnb1	268697	ENSMUSG00000041431
ENSMUSG00000034349_Smc4	0.975013	3.31374	2.96317	0.00728912	0.0559827	-3.05649	Smc4	70099	ENSMUSG00000034349
ENSMUSG00000026520_Pycr2	0.606579	3.16095	2.9454	0.00759228	0.0575937	-3.05705	Pycr2	69051	ENSMUSG00000026520
ENSMUSG00000000318_Clec10a	1.01722	-0.383323	2.62919	0.0154827	0.092761	-3.05818	Clec10a	17312	ENSMUSG00000000318
ENSMUSG00000052957_Gas1	-0.877548	3.14717	-2.95544	0.00741948	0.056559	-3.05932	Gas1	14451	ENSMUSG00000052957
ENSMUSG00000004846_Plod3	0.32157	4.81224	3.06052	0.00582395	0.0484046	-3.06181	Plod3	26433	ENSMUSG00000004846
ENSMUSG00000078942_Naip6	1.3806	-0.555867	2.6251	0.0156235	0.0933588	-3.06242	Naip6	17952	ENSMUSG00000078942
ENSMUSG00000050549_Fam241a	0.554924	1.95779	2.83262	0.00981702	0.0677615	-3.06504	Fam241a	70617	ENSMUSG00000050549
ENSMUSG00000037872_Ackr1	-1.17154	0.150006	-2.6576	0.0145379	0.0887666	-3.06507	Ackr1	13349	ENSMUSG00000037872
ENSMUSG00000038135_Crygn	-1.13011	0.830132	-2.72598	0.0124823	0.0792322	-3.06554	Crygn	214301	ENSMUSG00000038135
ENSMUSG00000030168_Adipor2	-0.428923	9.07218	-3.03317	0.00620406	0.0506958	-3.06701	Adipor2	68465	ENSMUSG00000030168
ENSMUSG00000060791_Gmfg	0.753549	3.17358	2.94674	0.00756892	0.0574586	-3.07463	Gmfg	63986	ENSMUSG00000060791
ENSMUSG00000030245_Golt1b	0.715996	2.35597	2.85974	0.00923111	0.0651849	-3.0756	Golt1b	66964	ENSMUSG00000030245
ENSMUSG00000035275_Raver2	1.56264	-0.41613	2.61466	0.0159879	0.0944901	-3.07633	Raver2	242570	ENSMUSG00000035275
ENSMUSG00000020290_Xpo1	0.381627	4.56082	3.03992	0.00610812	0.0503143	-3.07847	Xpo1	103573	ENSMUSG00000020290
ENSMUSG00000038379_Ttk	2.14232	-1.16856	2.58679	0.0170005	0.0986291	-3.08048	Ttk	22137	ENSMUSG00000038379
ENSMUSG00000021418_Rpp40	-0.480807	2.46778	-2.87858	0.00884393	0.0635516	-3.0805	Rpp40	208366	ENSMUSG00000021418
ENSMUSG00000049076_Acap2	0.41722	3.89657	3.00125	0.00667797	0.0533186	-3.08318	Acap2	78618	ENSMUSG00000049076
ENSMUSG00000031023_Akip1	-0.348727	3.92065	-3.00386	0.00663807	0.053125	-3.08532	Akip1	57373	ENSMUSG00000031023
ENSMUSG00000076490_Trbc1	1.51483	-0.237695	2.60739	0.0162465	0.0954088	-3.09133	NA	NA	ENSMUSG00000076490
ENSMUSG00000042333_Tnfrsf14	1.09019	2.1088	2.83272	0.00981474	0.0677615	-3.097	Tnfrsf14	230979	ENSMUSG00000042333
ENSMUSG00000062232_Rapgef2	0.441454	3.58839	2.96949	0.00718401	0.0554954	-3.09793	Rapgef2	76089	ENSMUSG00000062232
ENSMUSG00000039298_Cdk5rap2	0.60234	2.18071	2.83861	0.00968471	0.0672786	-3.09916	Cdk5rap2	214444	ENSMUSG00000039298
ENSMUSG00000020407_Upp1	1.05654	1.139	2.7285	0.0124119	0.07894	-3.10149	Upp1	22271	ENSMUSG00000020407
ENSMUSG00000027374_Mrps5	-0.288633	5.11994	-3.05317	0.0059238	0.0490769	-3.1028	Mrps5	77721	ENSMUSG00000027374
ENSMUSG00000035376_Hacd2	-0.313937	5.84365	-3.06341	0.00578512	0.0481746	-3.1039	Hacd2	70757	ENSMUSG00000035376
ENSMUSG00000041688_Amot	0.484818	2.60084	2.87193	0.00897883	0.064091	-3.10548	Amot	27494	ENSMUSG00000041688
ENSMUSG00000029175_Slc35f6	0.333813	4.34758	3.01654	0.00644679	0.0520912	-3.10683	Slc35f6	74919	ENSMUSG00000029175
ENSMUSG00000023994_Nfya	0.46948	3.01168	2.91882	0.00806844	0.0599072	-3.10864	Nfya	18044	ENSMUSG00000023994
ENSMUSG00000023143_Nagpa	0.326677	3.84456	2.98332	0.00695943	0.0545506	-3.11204	Nagpa	27426	ENSMUSG00000023143
ENSMUSG00000038740_Mvb12b	0.793202	1.40256	2.75543	0.0116845	0.0758408	-3.11239	Mvb12b	72543	ENSMUSG00000038740
ENSMUSG00000031465_Angpt2	0.95588	-0.208833	2.60392	0.0163714	0.0959244	-3.11496	Angpt2	11601	ENSMUSG00000031465
ENSMUSG00000063605_Ccdc102a	0.764352	0.218772	2.63295	0.0153544	0.0921764	-3.11611	Ccdc102a	234582	ENSMUSG00000063605
ENSMUSG00000039497_Dse	0.941434	3.6248	2.95874	0.00736362	0.0563688	-3.1193	Dse	212898	ENSMUSG00000039497
ENSMUSG00000037922_Bank1	0.801118	1.71875	2.78632	0.0108999	0.0724926	-3.12194	Bank1	242248	ENSMUSG00000037922
ENSMUSG00000032477_Cdc25a	0.659755	1.93277	2.80157	0.0105312	0.070804	-3.12223	Cdc25a	12530	ENSMUSG00000032477
ENSMUSG00000022951_Rcan1	0.793113	5.00052	3.03487	0.00617981	0.0506264	-3.12243	Rcan1	54720	ENSMUSG00000022951
ENSMUSG00000017778_Cox7c	-0.465651	7.9362	-3.03144	0.00622893	0.0508245	-3.12388	Cox7c	12867	ENSMUSG00000017778
ENSMUSG00000098650_Commd1b	0.715222	3.07442	2.9077	0.0082759	0.0606821	-3.12453	NA	NA	ENSMUSG00000098650
ENSMUSG00000018796_Acsl1	-0.557605	9.40932	-2.99727	0.00673956	0.0535556	-3.12547	Acsl1	14081	ENSMUSG00000018796
ENSMUSG00000032370_Lactb	-0.289166	5.55174	-3.05122	0.00595058	0.0492358	-3.12668	Lactb	80907	ENSMUSG00000032370
ENSMUSG00000030726_Pold3	0.450531	3.01038	2.9065	0.00829862	0.0607814	-3.12917	Pold3	67967	ENSMUSG00000030726
ENSMUSG00000032369_Plscr1	0.358626	4.36125	3.00823	0.00657147	0.0528534	-3.12968	Plscr1	22038	ENSMUSG00000032369
ENSMUSG00000022074_Tnfrsf10b	1.21073	-0.899469	2.54923	0.0184611	0.104393	-3.13254	Tnfrsf10b	21933	ENSMUSG00000022074
ENSMUSG00000059811_Atl2	-0.312824	6.20157	-3.05092	0.00595474	0.0492388	-3.13268	Atl2	56298	ENSMUSG00000059811
ENSMUSG00000011382_Dhdh	-0.282104	6.72533	-3.04441	0.00604507	0.0498583	-3.13679	Dhdh	71755	ENSMUSG00000011382
ENSMUSG00000037022_Mmaa	-0.440672	4.1767	-2.99714	0.0067415	0.0535556	-3.13902	Mmaa	109136	ENSMUSG00000037022
ENSMUSG00000034854_Mfsd12	0.486842	3.86754	2.97069	0.00716423	0.0554511	-3.14055	Mfsd12	73822	ENSMUSG00000034854
ENSMUSG00000018931_Natd1	0.42859	2.47812	2.84682	0.00950603	0.0663551	-3.14157	Natd1	24083	ENSMUSG00000018931
ENSMUSG00000060147_Serpinb6a	0.98592	4.43179	2.99971	0.00670174	0.0534539	-3.14315	Serpinb6a	20719	ENSMUSG00000060147
ENSMUSG00000037552_Plekhg2	0.630344	2.06672	2.80608	0.0104245	0.0704524	-3.14381	Plekhg2	101497	ENSMUSG00000037552
ENSMUSG00000037788_Vopp1	0.667731	1.92488	2.7936	0.0107223	0.0716055	-3.14392	Vopp1	232023	ENSMUSG00000037788
ENSMUSG00000068205_Macrod2	-0.57516	1.70081	-2.76893	0.0113353	0.0743567	-3.14476	Macrod2	72899	ENSMUSG00000068205
ENSMUSG00000033949_Trim36	1.62691	-1.85135	2.5061	0.0202828	0.111058	-3.14923	Trim36	28105	ENSMUSG00000033949
ENSMUSG00000029311_Hsd17b11	-0.311659	7.32307	-3.02973	0.00625363	0.0509078	-3.1504	Hsd17b11	114664	ENSMUSG00000029311
ENSMUSG00000037542_Aldh8a1	-0.292564	8.08126	-3.01556	0.00646144	0.0521313	-3.15255	Aldh8a1	237320	ENSMUSG00000037542
ENSMUSG00000037548_H2-DMb2	1.01549	-0.0129455	2.60403	0.0163673	0.0959244	-3.15255	H2-DMb2	15000	ENSMUSG00000037548
ENSMUSG00000109675_Nxpe1-ps	1.88245	-1.77856	2.50182	0.0204725	0.111856	-3.15407	Nxpe1-ps	640268	ENSMUSG00000109675
ENSMUSG00000032555_Topbp1	0.699628	3.25944	2.91385	0.00816048	0.0602109	-3.15637	Topbp1	235559	ENSMUSG00000032555
ENSMUSG00000000204_Slfn4	3.688	-2.90395	2.5131	0.0199758	0.109931	-3.15976	Slfn4	20558	ENSMUSG00000000204
ENSMUSG00000038412_Higd1a	-0.450974	5.89516	-3.03771	0.00613942	0.0504224	-3.16154	Higd1a	56295	ENSMUSG00000038412
ENSMUSG00000030930_Chst15	-0.474481	3.00561	-2.89384	0.00854176	0.0620344	-3.16307	Chst15	77590	ENSMUSG00000030930
ENSMUSG00000110537_Gm4316	0.670816	2.00025	2.7866	0.0108929	0.0724831	-3.16388	NA	NA	ENSMUSG00000110537
ENSMUSG00000046794_Ppp1r3b	-0.579945	7.55414	-3.02113	0.00637898	0.0516259	-3.16418	Ppp1r3b	244416	ENSMUSG00000046794
ENSMUSG00000030662_Ipo5	0.298969	5.34933	3.02976	0.00625321	0.0509078	-3.16458	Ipo5	70572	ENSMUSG00000030662
ENSMUSG00000030729_Pgm2l1	0.658492	1.52115	2.74264	0.0120248	0.0773902	-3.16628	Pgm2l1	70974	ENSMUSG00000030729
ENSMUSG00000086103_Gm11832	-1.14793	-0.649469	-2.54783	0.0185177	0.104618	-3.16699	NA	NA	ENSMUSG00000086103
ENSMUSG00000034959_Rubcnl	1.43312	-0.947449	2.5284	0.0193209	0.107792	-3.16845	Rubcnl	271221	ENSMUSG00000034959
ENSMUSG00000021365_Nedd9	0.926122	2.50884	2.83433	0.00977903	0.067663	-3.16995	Nedd9	18003	ENSMUSG00000021365
ENSMUSG00000038070_Cntln	0.915084	0.256831	2.61002	0.0161524	0.0950714	-3.1719	Cntln	338349	ENSMUSG00000038070
ENSMUSG00000027048_Abcb11	-0.343333	9.51349	-2.97337	0.00712034	0.0553429	-3.17355	Abcb11	27413	ENSMUSG00000027048
ENSMUSG00000057649_Brd9	0.431322	2.79723	2.86198	0.00918437	0.0650702	-3.17445	Brd9	105246	ENSMUSG00000057649
ENSMUSG00000022057_Adamdec1	1.11663	1.84082	2.7648	0.0114411	0.0748234	-3.17475	Adamdec1	58860	ENSMUSG00000022057
ENSMUSG00000036634_Mag	1.39572	-1.27345	2.50872	0.0201675	0.110657	-3.17525	Mag	17136	ENSMUSG00000036634
ENSMUSG00000070390_Nlrp1b	1.67362	-2.08036	2.48751	0.0211186	0.113877	-3.17671	Nlrp1b	637515	ENSMUSG00000070390
ENSMUSG00000031327_Chic1	-0.584558	2.29993	-2.81732	0.010163	0.0693484	-3.17679	Chic1	12212	ENSMUSG00000031327
ENSMUSG00000079491_H2-T10	0.631465	1.42939	2.72494	0.0125114	0.0793776	-3.17816	H2-T10	15024	ENSMUSG00000079491
ENSMUSG00000019916_P4ha1	0.652788	3.73276	2.94069	0.00767457	0.0580818	-3.17936	P4ha1	18451	ENSMUSG00000019916
ENSMUSG00000027428_Rbbp9	-0.37302	3.96803	-2.96644	0.00723462	0.0557294	-3.1799	Rbbp9	26450	ENSMUSG00000027428
ENSMUSG00000038332_Sesn1	0.454069	3.61696	2.93585	0.00776018	0.0584786	-3.18238	Sesn1	140742	ENSMUSG00000038332
ENSMUSG00000048307_Ankrd46	-0.314802	5.52914	-3.02542	0.00631617	0.0512778	-3.18322	Ankrd46	68839	ENSMUSG00000048307
ENSMUSG00000036249_Rbm43	0.481012	2.33056	2.8165	0.0101819	0.0693925	-3.18401	Rbm43	71684	ENSMUSG00000036249
ENSMUSG00000032481_Smarcc1	0.430669	4.21954	2.97431	0.00710496	0.0552811	-3.18476	Smarcc1	20588	ENSMUSG00000032481
ENSMUSG00000050014_Apol10b	1.62814	-0.895328	2.53128	0.0192	0.107442	-3.18705	Apol10b	328561	ENSMUSG00000050014
ENSMUSG00000022421_Nptxr	1.82519	-1.14834	2.49623	0.0207224	0.112651	-3.19124	Nptxr	73340	ENSMUSG00000022421
ENSMUSG00000027536_Chmp4c	0.734699	1.31393	2.70054	0.0132127	0.0828128	-3.19255	Chmp4c	66371	ENSMUSG00000027536
ENSMUSG00000000386_Mx1	1.23011	0.450945	2.6223	0.0157202	0.0936611	-3.19335	Mx1	17857	ENSMUSG00000000386
ENSMUSG00000006715_Gmnn	0.51877	2.70553	2.84361	0.00957549	0.0666629	-3.20056	Gmnn	57441	ENSMUSG00000006715
ENSMUSG00000043631_Ecm2	-1.13884	-0.756432	-2.52257	0.019568	0.108656	-3.20345	Ecm2	407800	ENSMUSG00000043631
ENSMUSG00000028102_Pex11b	-0.307116	4.50423	-2.98493	0.00693362	0.0545133	-3.20442	Pex11b	18632	ENSMUSG00000028102
ENSMUSG00000074825_Itpripl1	0.505916	2.41951	2.8087	0.0103629	0.070146	-3.20554	Itpripl1	73338	ENSMUSG00000074825
ENSMUSG00000111709_Gm3776	1.4626	2.86887	2.81283	0.0102666	0.069713	-3.20807	Gm3776	100042295	ENSMUSG00000111709
ENSMUSG00000019809_Pex3	-0.305731	4.26615	-2.96717	0.00722248	0.055669	-3.21324	Pex3	56535	ENSMUSG00000019809
ENSMUSG00000034320_Slc26a2	0.592467	2.42875	2.80621	0.0104214	0.0704524	-3.2139	Slc26a2	13521	ENSMUSG00000034320
ENSMUSG00000022283_Pabpc1	0.302831	7.72861	2.99435	0.00678495	0.0537031	-3.2143	Pabpc1	18458	ENSMUSG00000022283
ENSMUSG00000033898_Cfhr2	-0.505033	9.34662	-2.95837	0.00736986	0.0563688	-3.21536	Cfhr2	545366	ENSMUSG00000033898
ENSMUSG00000023345_Poc1a	0.984052	1.3302	2.69227	0.0134588	0.0837872	-3.21792	Poc1a	70235	ENSMUSG00000023345
ENSMUSG00000027199_Gatm	0.981832	3.57351	2.91065	0.00822039	0.0605287	-3.21831	Gatm	67092	ENSMUSG00000027199
ENSMUSG00000024833_Pola2	0.440105	2.69503	2.83439	0.0097777	0.067663	-3.22119	Pola2	18969	ENSMUSG00000024833
ENSMUSG00000031536_Polb	-0.416764	3.63312	-2.92364	0.00797997	0.0595577	-3.22236	Polb	18970	ENSMUSG00000031536
ENSMUSG00000023046_Igfbp6	-2.98096	-1.7682	-2.4686	0.0220015	0.117139	-3.22371	Igfbp6	16012	ENSMUSG00000023046
ENSMUSG00000042606_Hirip3	0.713048	1.65723	2.72464	0.0125198	0.0793921	-3.2276	Hirip3	233876	ENSMUSG00000042606
ENSMUSG00000018750_Zbtb4	0.528899	3.88783	2.9345	0.00778409	0.0585344	-3.22809	Zbtb4	75580	ENSMUSG00000018750
ENSMUSG00000063011_Msln	-2.82154	-1.91247	-2.47776	0.0215693	0.115318	-3.22954	Msln	56047	ENSMUSG00000063011
ENSMUSG00000035929_H2-Q4	0.663667	5.84838	3.00389	0.00663762	0.053125	-3.22995	H2-Q4	15015	ENSMUSG00000035929
ENSMUSG00000036585_Fgf1	-0.342306	5.62985	-3.00415	0.00663353	0.053125	-3.23052	Fgf1	14164	ENSMUSG00000036585
ENSMUSG00000052974_Cyp2f2	-0.387916	10.4591	-2.92482	0.00795851	0.0594318	-3.23098	Cyp2f2	13107	ENSMUSG00000052974
ENSMUSG00000038576_Susd4	-0.759684	3.92228	-2.93898	0.00770466	0.0582706	-3.23508	Susd4	96935	ENSMUSG00000038576
ENSMUSG00000051344_Plekhm3	0.968046	1.18683	2.6752	0.0139801	0.0859918	-3.23624	Plekhm3	241075	ENSMUSG00000051344
ENSMUSG00000025175_Fn3k	-0.538363	3.34766	-2.8933	0.00855228	0.0620759	-3.23819	Fn3k	63828	ENSMUSG00000025175
ENSMUSG00000031609_Sap30	0.675237	1.98848	2.74888	0.0118577	0.0765813	-3.23951	Sap30	60406	ENSMUSG00000031609
ENSMUSG00000020988_L2hgdh	-0.318796	5.32942	-2.9961	0.00675764	0.0536181	-3.24096	L2hgdh	217666	ENSMUSG00000020988
ENSMUSG00000061959_Ces1e	-0.599557	6.93006	-2.99377	0.00679404	0.0537422	-3.24198	Ces1e	13897	ENSMUSG00000061959
ENSMUSG00000023336_Wfdc1	-0.506641	1.8953	-2.73943	0.0121118	0.0777957	-3.24589	Wfdc1	67866	ENSMUSG00000023336
ENSMUSG00000004814_Ccl24	1.35326	2.2732	2.77199	0.0112575	0.074147	-3.24694	Ccl24	56221	ENSMUSG00000004814
ENSMUSG00000034957_Cebpa	-0.344595	8.58487	-2.95973	0.00734686	0.0563259	-3.2498	Cebpa	12606	ENSMUSG00000034957
ENSMUSG00000027579_Srms	-0.817839	0.470811	-2.58958	0.0168966	0.0982461	-3.25151	Srms	20811	ENSMUSG00000027579
ENSMUSG00000038058_Nod1	0.673951	3.91256	2.9226	0.00799901	0.0595776	-3.25262	Nod1	107607	ENSMUSG00000038058
ENSMUSG00000049940_Pgrmc2	-0.280988	6.08358	-2.99527	0.00677058	0.0536832	-3.25596	Pgrmc2	70804	ENSMUSG00000049940
ENSMUSG00000025889_Snca	2.50752	-1.7134	2.44628	0.0230881	0.120795	-3.2564	Snca	20617	ENSMUSG00000025889
ENSMUSG00000019432_Ddx39b	0.342033	5.33386	2.98632	0.00691143	0.054438	-3.25769	Ddx39b	53817	ENSMUSG00000019432
ENSMUSG00000023367_Tmem176a	0.494562	7.76033	2.97468	0.00709889	0.0552757	-3.25778	Tmem176a	66058	ENSMUSG00000023367
ENSMUSG00000006276_Eps15l1	0.434725	3.13983	2.85797	0.00926828	0.0652458	-3.25948	Eps15l1	13859	ENSMUSG00000006276
ENSMUSG00000020283_Pex13	-0.32488	5.45517	-2.98779	0.00688823	0.0542883	-3.26276	Pex13	72129	ENSMUSG00000020283
ENSMUSG00000024835_Coro1b	0.477285	6.15307	2.99079	0.00684085	0.0540465	-3.26307	Coro1b	23789	ENSMUSG00000024835
ENSMUSG00000005442_Cic	0.570568	4.47725	2.95072	0.00750026	0.0570293	-3.26469	Cic	71722	ENSMUSG00000005442
ENSMUSG00000028896_Rcc1	0.634812	2.87626	2.82961	0.0098842	0.0680469	-3.2648	Rcc1	100088	ENSMUSG00000028896
ENSMUSG00000009863_Sdhb	-0.364418	7.47717	-2.97522	0.00709014	0.0552757	-3.26498	Sdhb	67680	ENSMUSG00000009863
ENSMUSG00000007777_0610009B22Rik	-0.326076	4.04398	-2.92996	0.00786552	0.0590115	-3.26612	0610009B22Rik	66050	ENSMUSG00000007777
ENSMUSG00000004698_Hdac9	1.41836	0.58726	2.59788	0.0165905	0.0969892	-3.26618	Hdac9	79221	ENSMUSG00000004698
ENSMUSG00000114433_Gm48488	-0.936552	-0.370806	-2.52086	0.0196411	0.108969	-3.26696	NA	NA	ENSMUSG00000114433
ENSMUSG00000026858_Miga2	-0.399774	5.42298	-2.98426	0.00694439	0.0545178	-3.26951	Miga2	108958	ENSMUSG00000026858
ENSMUSG00000002997_Prkar2b	0.847198	-0.553071	2.49781	0.0206513	0.1125	-3.27155	Prkar2b	19088	ENSMUSG00000002997
ENSMUSG00000097327_E030030I06Rik	-0.819638	0.924667	-2.63422	0.0153112	0.0920878	-3.2731	E030030I06Rik	319887	ENSMUSG00000097327
ENSMUSG00000025868_Higd2a	-0.400089	5.58586	-2.98386	0.00695068	0.0545178	-3.27529	Higd2a	67044	ENSMUSG00000025868
ENSMUSG00000031311_Nono	0.279055	6.29806	2.98384	0.00695103	0.0545178	-3.27923	Nono	53610	ENSMUSG00000031311
ENSMUSG00000021376_Tpmt	-0.301617	5.3153	-2.97712	0.00705926	0.0551662	-3.28074	Tpmt	22017	ENSMUSG00000021376
ENSMUSG00000048217_Nags	-0.304875	6.08591	-2.98302	0.00696413	0.0545544	-3.28233	Nags	217214	ENSMUSG00000048217
ENSMUSG00000053644_Aldh7a1	-0.26237	8.76829	-2.94124	0.00766502	0.0580435	-3.28355	Aldh7a1	110695	ENSMUSG00000053644
ENSMUSG00000036158_Prickle1	-0.809384	0.921846	-2.62416	0.0156558	0.0935085	-3.28491	Prickle1	106042	ENSMUSG00000036158
ENSMUSG00000055782_Abcd2	0.967483	3.64968	2.87614	0.00889319	0.0637212	-3.28781	Abcd2	26874	ENSMUSG00000055782
ENSMUSG00000035642_Aamdc	-0.484999	3.96308	-2.91021	0.00822872	0.0605287	-3.29051	Aamdc	66273	ENSMUSG00000035642
ENSMUSG00000019087_Atp6ap1	0.230424	6.12864	2.97907	0.00702762	0.0549521	-3.29073	Atp6ap1	54411	ENSMUSG00000019087
ENSMUSG00000020429_Igfbp1	1.3802	7.46884	2.96494	0.00725947	0.0558876	-3.29211	Igfbp1	16006	ENSMUSG00000020429
ENSMUSG00000040631_Dok4	0.666284	0.261575	2.54078	0.0188054	0.105829	-3.29387	Dok4	114255	ENSMUSG00000040631
ENSMUSG00000028799_Zfp362	0.453896	2.42689	2.77088	0.0112856	0.0742192	-3.29432	Zfp362	230761	ENSMUSG00000028799
ENSMUSG00000022781_Pak2	0.335828	4.74408	2.95145	0.00748776	0.0570012	-3.29469	Pak2	224105	ENSMUSG00000022781
ENSMUSG00000001750_Tcirg1	0.468728	5.24588	2.96719	0.0072221	0.055669	-3.29669	Tcirg1	27060	ENSMUSG00000001750
ENSMUSG00000029923_Rab19	1.55302	-1.68787	2.42541	0.0241488	0.124082	-3.29731	Rab19	19331	ENSMUSG00000029923
ENSMUSG00000039086_Ss18l1	-0.495496	1.52835	-2.68	0.0138317	0.0853293	-3.29829	Ss18l1	269397	ENSMUSG00000039086
ENSMUSG00000054435_Gimap4	0.869833	3.53064	2.86802	0.00905899	0.0645241	-3.30063	Gimap4	107526	ENSMUSG00000054435
ENSMUSG00000005299_Letm1	-0.261984	6.30845	-2.97202	0.00714251	0.0554155	-3.30594	Letm1	56384	ENSMUSG00000005299
ENSMUSG00000020652_Cenpo	0.464454	1.66865	2.68322	0.0137328	0.0848811	-3.30732	Cenpo	52504	ENSMUSG00000020652
ENSMUSG00000048938_Nr1h5	-0.942931	-0.166248	-2.50205	0.020462	0.111846	-3.30914	Nr1h5	381463	ENSMUSG00000048938
ENSMUSG00000019647_Sema6a	-0.754513	1.98791	-2.71806	0.0127055	0.0803336	-3.31278	Sema6a	20358	ENSMUSG00000019647
ENSMUSG00000040701_Ap1g2	0.44181	2.74456	2.7927	0.0107441	0.0716896	-3.31396	Ap1g2	11766	ENSMUSG00000040701
ENSMUSG00000021714_Cenpk	1.38914	-0.433382	2.4735	0.0217696	0.116197	-3.31413	Cenpk	60411	ENSMUSG00000021714
ENSMUSG00000022965_Ifngr2	0.4011	4.34301	2.92249	0.00800103	0.0595776	-3.31513	Ifngr2	15980	ENSMUSG00000022965
ENSMUSG00000008734_Gprc5b	1.66992	-0.681035	2.45414	0.0226995	0.119677	-3.31523	Gprc5b	64297	ENSMUSG00000008734
ENSMUSG00000028838_Extl1	-1.31614	1.76545	-2.6878	0.0135933	0.08431	-3.31572	Extl1	56219	ENSMUSG00000028838
ENSMUSG00000020774_Aspa	-0.548107	2.85133	-2.81093	0.0103108	0.0699394	-3.31687	Aspa	11484	ENSMUSG00000020774
ENSMUSG00000071266_Zfp946	-0.413981	3.13496	-2.8342	0.00978185	0.067663	-3.31891	Zfp946	74149	ENSMUSG00000071266
ENSMUSG00000070738_Dgkd	0.424181	3.74441	2.88117	0.00879194	0.0633186	-3.3202	Dgkd	227333	ENSMUSG00000070738
ENSMUSG00000021520_Uqcrb	-0.409984	7.02276	-2.95564	0.00741615	0.056559	-3.32341	Uqcrb	67530	ENSMUSG00000021520
ENSMUSG00000022912_Pros1	0.314647	5.78206	2.96178	0.00731234	0.0561278	-3.32425	Pros1	19128	ENSMUSG00000022912
ENSMUSG00000058254_Tspan7	-0.868193	4.1424	-2.90208	0.00838274	0.0612886	-3.32434	Tspan7	21912	ENSMUSG00000058254
ENSMUSG00000046808_Atp10d	0.872798	0.474905	2.55344	0.0182918	0.103829	-3.32489	Atp10d	231287	ENSMUSG00000046808
ENSMUSG00000055546_Timd4	1.33848	3.5428	2.85836	0.00926009	0.0652458	-3.32561	Timd4	276891	ENSMUSG00000055546
ENSMUSG00000059182_Skap2	0.318558	4.72585	2.93719	0.00773628	0.0583895	-3.32731	Skap2	54353	ENSMUSG00000059182
ENSMUSG00000074863_Platr25	1.00856	-0.88178	2.43365	0.0237246	0.122884	-3.33101	Platr25	435366	ENSMUSG00000074863
ENSMUSG00000027099_Mtx2	-0.275653	5.37498	-2.95463	0.00743333	0.0566201	-3.33208	Mtx2	53375	ENSMUSG00000027099
ENSMUSG00000031482_Slc25a15	-0.322446	8.24414	-2.92996	0.00786549	0.0590115	-3.33384	Slc25a15	18408	ENSMUSG00000031482
ENSMUSG00000034773_Hrob	1.7129	-1.96271	2.40097	0.0254482	0.128521	-3.3339	Hrob	217216	ENSMUSG00000034773
ENSMUSG00000020330_Hmmr	2.19125	0.0198795	2.5768	0.0173781	0.100325	-3.33564	Hmmr	15366	ENSMUSG00000020330
ENSMUSG00000035969_Rusc2	-0.349083	3.50029	-2.85921	0.00924237	0.0651849	-3.34054	Rusc2	100213	ENSMUSG00000035969
ENSMUSG00000025916_Ppp1r42	1.75776	-1.93151	2.38207	0.0264972	0.131814	-3.34128	Ppp1r42	69312	ENSMUSG00000025916
ENSMUSG00000116138_C030006K11Rik	-0.290242	4.63256	-2.92781	0.00790423	0.059163	-3.34294	C030006K11Rik	223665	ENSMUSG00000116138
ENSMUSG00000032047_Acat1	-0.416225	8.20372	-2.92502	0.00795476	0.0594318	-3.34502	Acat1	110446	ENSMUSG00000032047
ENSMUSG00000037020_Wdr62	0.914714	0.910059	2.58467	0.0170801	0.0989588	-3.34599	Wdr62	233064	ENSMUSG00000037020
ENSMUSG00000028763_Hspg2	0.731991	4.59382	2.91694	0.00810316	0.0599721	-3.34613	Hspg2	15530	ENSMUSG00000028763
ENSMUSG00000020115_Tbk1	0.265428	4.33678	2.91018	0.00822921	0.0605287	-3.34676	Tbk1	56480	ENSMUSG00000020115
ENSMUSG00000035686_Thrsp	-1.01271	9.0628	-2.90819	0.00826665	0.0606584	-3.34679	Thrsp	21835	ENSMUSG00000035686
ENSMUSG00000031697_Orc6	0.436817	2.02049	2.70363	0.0131217	0.0825221	-3.34759	Orc6	56452	ENSMUSG00000031697
ENSMUSG00000107451_Gm44421	-0.821739	0.564174	-2.55041	0.0184135	0.104362	-3.3482	NA	NA	ENSMUSG00000107451
ENSMUSG00000020167_Tcf3	0.406083	3.8346	2.87404	0.0089358	0.0638927	-3.35088	Tcf3	21423	ENSMUSG00000020167
ENSMUSG00000024663_Rab3il1	0.754893	2.48418	2.75104	0.0118004	0.0763254	-3.35197	Rab3il1	74760	ENSMUSG00000024663
ENSMUSG00000028800_Hdac1	0.298272	4.55598	2.91468	0.0081451	0.060166	-3.35305	Hdac1	433759	ENSMUSG00000028800
ENSMUSG00000052397_Ezr	0.9473	2.72214	2.77039	0.0112981	0.0742638	-3.35335	Ezr	22350	ENSMUSG00000052397
ENSMUSG00000037410_Tbc1d2b	0.637704	4.65113	2.91777	0.00808772	0.0599333	-3.35346	Tbc1d2b	67016	ENSMUSG00000037410
ENSMUSG00000075602_Ly6a	1.47455	4.85141	2.91808	0.00808203	0.0599333	-3.35432	Ly6a	110454	ENSMUSG00000075602
ENSMUSG00000033857_Engase	0.588042	3.10952	2.80674	0.010409	0.0704214	-3.35724	Engase	217364	ENSMUSG00000033857
ENSMUSG00000033392_Clasp2	0.510772	2.80306	2.77835	0.0110974	0.0733936	-3.35819	Clasp2	76499	ENSMUSG00000033392
ENSMUSG00000031591_Asah1	0.528478	5.32309	2.93876	0.00770852	0.0582706	-3.35847	Asah1	11886	ENSMUSG00000031591
ENSMUSG00000029802_Abcg2	-0.517355	6.31415	-2.94668	0.00757003	0.0574586	-3.35928	Abcg2	26357	ENSMUSG00000029802
ENSMUSG00000029910_Mad2l1	1.06947	2.23664	2.72118	0.0126172	0.0798391	-3.36009	Mad2l1	56150	ENSMUSG00000029910
ENSMUSG00000058013_Septin11	0.70861	3.82642	2.86124	0.0091997	0.0650702	-3.36312	Septin11	52398	ENSMUSG00000058013
ENSMUSG00000025732_Mcrip2	-0.588561	4.91084	-2.9262	0.00793347	0.0593132	-3.36545	Mcrip2	68241	ENSMUSG00000025732
ENSMUSG00000051076_Vtcn1	1.15285	-0.868757	2.41437	0.0247278	0.126113	-3.36815	Vtcn1	242122	ENSMUSG00000051076
ENSMUSG00000094145_Vmn2r20	-1.39738	-0.73717	-2.42959	0.0239328	0.123567	-3.37052	Vmn2r20	667180	ENSMUSG00000094145
ENSMUSG00000021846_Peli2	-0.376501	4.05543	-2.88394	0.00873681	0.0631322	-3.37066	Peli2	93834	ENSMUSG00000021846
ENSMUSG00000002210_Smg9	0.360059	3.06132	2.79902	0.010592	0.0710654	-3.37145	Smg9	71997	ENSMUSG00000002210
ENSMUSG00000052562_Slc22a30	-0.513963	7.24676	-2.92953	0.00787318	0.0590115	-3.3718	Slc22a30	319800	ENSMUSG00000052562
ENSMUSG00000018102_H2bc4	-0.476418	7.60731	-2.92263	0.00799846	0.0595776	-3.37331	H2bc4	68024	ENSMUSG00000018102
ENSMUSG00000032218_Ccnb2	1.62014	0.905204	2.6218	0.0157378	0.0936611	-3.37465	Ccnb2	12442	ENSMUSG00000032218
ENSMUSG00000001521_Tulp3	0.694954	0.30065	2.50836	0.0201831	0.110695	-3.37571	Tulp3	22158	ENSMUSG00000001521
ENSMUSG00000007987_Ift22	0.492193	2.17998	2.70393	0.013113	0.0825075	-3.37644	Ift22	67286	ENSMUSG00000007987
ENSMUSG00000031765_Mt1	1.86963	4.5291	2.88279	0.00875967	0.0631957	-3.37818	Mt1	17748	ENSMUSG00000031765
ENSMUSG00000038543_BC028528	0.808657	0.364366	2.51324	0.0199701	0.109931	-3.38542	BC028528	229600	ENSMUSG00000038543
ENSMUSG00000029191_Rfc1	0.352008	4.1618	2.87779	0.00885995	0.0635962	-3.38788	Rfc1	19687	ENSMUSG00000029191
ENSMUSG00000086628_Gm16157	-0.812661	2.87064	-2.773	0.0112319	0.0740918	-3.38925	Gm16157	100504026	ENSMUSG00000086628
ENSMUSG00000021288_Klc1	0.463859	3.13099	2.79516	0.0106847	0.0714647	-3.3897	Klc1	16593	ENSMUSG00000021288
ENSMUSG00000017453_Pipox	-0.277336	7.6073	-2.91527	0.00813405	0.0601186	-3.38994	Pipox	19193	ENSMUSG00000017453
ENSMUSG00000006574_Slc4a1	2.26692	-2.64108	2.3496	0.0283934	0.138428	-3.39017	Slc4a1	20533	ENSMUSG00000006574
ENSMUSG00000034285_Nipsnap1	-0.266767	7.77526	-2.91195	0.008196	0.0604041	-3.39168	Nipsnap1	18082	ENSMUSG00000034285
ENSMUSG00000023911_Flywch2	-0.837422	-0.508993	-2.43243	0.0237867	0.123157	-3.39179	Flywch2	76917	ENSMUSG00000023911
ENSMUSG00000028560_Usp1	0.413423	3.97683	2.86145	0.00919535	0.0650702	-3.39183	Usp1	230484	ENSMUSG00000028560
ENSMUSG00000071177_Serpina1d	-0.404542	11.7148	-2.82242	0.0100465	0.0687782	-3.39211	Serpina1d	20703	ENSMUSG00000071177
ENSMUSG00000005732_Ranbp1	0.363142	4.85472	2.90812	0.00826799	0.0606584	-3.39458	Ranbp1	19385	ENSMUSG00000005732
ENSMUSG00000019370_Calm3	0.373534	5.89948	2.92959	0.00787216	0.0590115	-3.39604	Calm3	12315	ENSMUSG00000019370
ENSMUSG00000034317_Trim59	1.51002	-0.363081	2.44668	0.0230679	0.120738	-3.39622	Trim59	66949	ENSMUSG00000034317
ENSMUSG00000030244_Gys2	-0.440929	6.24565	-2.92816	0.00789785	0.0591494	-3.4012	Gys2	232493	ENSMUSG00000030244
ENSMUSG00000029713_Gnb2	0.310799	6.90121	2.92164	0.00801649	0.05962	-3.40151	Gnb2	14693	ENSMUSG00000029713
ENSMUSG00000040860_Crocc	0.625786	0.520109	2.51821	0.0197551	0.109298	-3.40523	Crocc	230872	ENSMUSG00000040860
ENSMUSG00000073599_Ecscr	0.837034	1.46641	2.61101	0.0161174	0.0950463	-3.40554	Ecscr	68545	ENSMUSG00000073599
ENSMUSG00000027187_Cat	-0.400474	11.0603	-2.82868	0.00990494	0.0681118	-3.40936	Cat	12359	ENSMUSG00000027187
ENSMUSG00000066151_Fkbp15	0.296245	4.68749	2.89716	0.00847736	0.0617051	-3.40985	Fkbp15	338355	ENSMUSG00000066151
ENSMUSG00000020431_Adcy1	1.39033	-0.423388	2.4157	0.0246574	0.125803	-3.41181	Adcy1	432530	ENSMUSG00000020431
ENSMUSG00000036775_Decr2	-0.329162	7.17971	-2.91197	0.00819559	0.0604041	-3.41251	Decr2	26378	ENSMUSG00000036775
ENSMUSG00000039013_Siglecf	2.62342	-3.18092	2.34492	0.0286767	0.139035	-3.41343	Siglecf	233186	ENSMUSG00000039013
ENSMUSG00000117105_Dreh	0.995289	-0.30242	2.43857	0.0234745	0.122028	-3.41512	Dreh	101202683	ENSMUSG00000117105
ENSMUSG00000023030_Slc11a2	0.346198	4.89376	2.90085	0.00840626	0.0613255	-3.41726	Slc11a2	18174	ENSMUSG00000023030
ENSMUSG00000015714_Cers2	-0.217623	8.00789	-2.89568	0.00850608	0.0618225	-3.41756	Cers2	76893	ENSMUSG00000015714
ENSMUSG00000051439_Cd14	0.963421	2.5397	2.72988	0.0123736	0.0788902	-3.41801	Cd14	12475	ENSMUSG00000051439
ENSMUSG00000028191_Bcl10	0.393169	3.68632	2.83085	0.0098565	0.0679254	-3.41999	Bcl10	12042	ENSMUSG00000028191
ENSMUSG00000014859_E2f4	0.315949	4.03166	2.85592	0.00931166	0.0653178	-3.42129	E2f4	104394	ENSMUSG00000014859
ENSMUSG00000041235_Chd7	0.425417	3.15241	2.78702	0.0108826	0.0724521	-3.42132	Chd7	320790	ENSMUSG00000041235
ENSMUSG00000030246_Ldhb	-0.50558	0.8228	-2.54252	0.0187342	0.105657	-3.42176	Ldhb	16832	ENSMUSG00000030246
ENSMUSG00000029810_Tmem176b	0.44369	8.10243	2.89236	0.0085707	0.0621748	-3.422	Tmem176b	65963	ENSMUSG00000029810
ENSMUSG00000019699_Akt3	0.699816	1.4827	2.61051	0.0161349	0.0950463	-3.42204	Akt3	23797	ENSMUSG00000019699
ENSMUSG00000034783_Cd207	1.10299	1.7776	2.64044	0.0151017	0.0912941	-3.42221	Cd207	246278	ENSMUSG00000034783
[truncated: 10,950 more rows]

## Sheet: Pathways analyis Day 7
	p.geomean	stat.mean	p.val	q.val	set.size	exp1
mmu04062 Chemokine signaling pathway	6.89321e-09	5.87404	6.89321e-09	1.58544e-06	144	6.89321e-09
mmu04061 Viral protein interaction with cytokine and cytokine receptor	7.34768e-08	5.77338	7.34768e-08	4.22492e-06	53	7.34768e-08
mmu04380 Osteoclast differentiation	2.02752e-08	5.70829	2.02752e-08	2.33165e-06	107	2.02752e-08
mmu04060 Cytokine-cytokine receptor interaction	3.36922e-08	5.58238	3.36922e-08	2.58307e-06	138	3.36922e-08
mmu04640 Hematopoietic cell lineage	4.70699e-07	5.18529	4.70699e-07	2.16521e-05	62	4.70699e-07
mmu04064 NF-kappa B signaling pathway	6.34888e-07	5.04855	6.34888e-07	2.18554e-05	89	6.34888e-07
mmu04514 Cell adhesion molecules	7.70882e-07	4.97171	7.70882e-07	2.21629e-05	96	7.70882e-07
mmu04650 Natural killer cell mediated cytotoxicity	9.91734e-07	4.95411	9.91734e-07	2.53443e-05	82	9.91734e-07
mmu04621 NOD-like receptor signaling pathway	6.65164e-07	4.94563	6.65164e-07	2.18554e-05	146	6.65164e-07
mmu04110 Cell cycle	4.70003e-06	4.54052	4.70003e-06	0.000108101	118	4.70003e-06
mmu04145 Phagosome	6.6477e-06	4.44654	6.6477e-06	0.000138997	124	6.6477e-06
mmu04672 Intestinal immune network for IgA production	3.63086e-05	4.3292	3.63086e-05	0.000596499	26	3.63086e-05
mmu04670 Leukocyte transendothelial migration	2.08156e-05	4.21264	2.08156e-05	0.000398966	86	2.08156e-05
mmu04625 C-type lectin receptor signaling pathway	3.54831e-05	4.10632	3.54831e-05	0.000596499	83	3.54831e-05
mmu04620 Toll-like receptor signaling pathway	4.92557e-05	4.0118	4.92557e-05	0.000755254	80	4.92557e-05
mmu04660 T cell receptor signaling pathway	0.000121848	3.75266	0.000121848	0.00175156	85	0.000121848
mmu04662 B cell receptor signaling pathway	0.000133802	3.74307	0.000133802	0.00181026	71	0.000133802
mmu04659 Th17 cell differentiation	0.000181556	3.64179	0.000181556	0.00231989	84	0.000181556
mmu04666 Fc gamma R-mediated phagocytosis	0.00020116	3.61745	0.00020116	0.0024351	80	0.00020116
mmu04668 TNF signaling pathway	0.000278108	3.51952	0.000278108	0.0031198	94	0.000278108
mmu04658 Th1 and Th2 cell differentiation	0.000298416	3.5147	0.000298416	0.0031198	70	0.000298416
mmu04210 Apoptosis	0.000290478	3.48654	0.000290478	0.0031198	125	0.000290478
mmu04810 Regulation of actin cytoskeleton	0.000382964	3.39826	0.000382964	0.00382964	161	0.000382964
mmu04612 Antigen processing and presentation	0.000496096	3.37746	0.000496096	0.00475426	60	0.000496096
mmu03030 DNA replication	0.000707412	3.3312	0.000707412	0.00650819	35	0.000707412
mmu04657 IL-17 signaling pathway	0.000737387	3.27783	0.000737387	0.00652304	59	0.000737387
mmu04611 Platelet activation	0.00185466	2.93769	0.00185466	0.0157989	99	0.00185466
mmu04664 Fc epsilon RI signaling pathway	0.002251	2.91415	0.002251	0.0184903	50	0.002251
mmu04015 Rap1 signaling pathway	0.00428802	2.64496	0.00428802	0.0340085	161	0.00428802
mmu04115 p53 signaling pathway	0.00551125	2.58009	0.00551125	0.0411919	66	0.00551125
mmu04630 JAK-STAT signaling pathway	0.0056469	2.55821	0.0056469	0.0411919	97	0.0056469
mmu04010 MAPK signaling pathway	0.00573105	2.53912	0.00573105	0.0411919	218	0.00573105
mmu04218 Cellular senescence	0.00608217	2.52341	0.00608217	0.0423909	145	0.00608217
mmu00280 Valine, leucine and isoleucine degradation	0.00126532	-3.12	0.00126532	0.0291024	48	0.00126532
mmu00830 Retinol metabolism	0.000910137	-3.18205	0.000910137	0.023259	68	0.000910137
mmu00380 Tryptophan metabolism	0.000318374	-3.64267	0.000318374	0.00915326	37	0.000318374
mmu01240 Biosynthesis of cofactors	0.000136654	-3.69277	0.000136654	0.00449005	135	0.000136654
mmu03010 Ribosome	0.000136418	-3.7317	0.000136418	0.00449005	129	0.000136418
mmu00071 Fatty acid degradation	1.86587e-05	-4.4674	1.86587e-05	0.000858302	44	1.86587e-05
mmu00140 Steroid hormone biosynthesis	5.4602e-06	-4.65407	5.4602e-06	0.000313962	58	5.4602e-06
mmu04146 Peroxisome	2.84685e-06	-4.75866	2.84685e-06	0.000218258	78	2.84685e-06
mmu04714 Thermogenesis	2.43364e-07	-5.1285	2.43364e-07	2.79869e-05	202	2.43364e-07
mmu00190 Oxidative phosphorylation	2.27285e-08	-5.73309	2.27285e-08	5.22755e-06	119	2.27285e-08
