# Supplementary material
Source: HighWire-hosted journal article supplement (https://jitc.bmj.com/content/12/4/e008078)

Supplementary figure 1

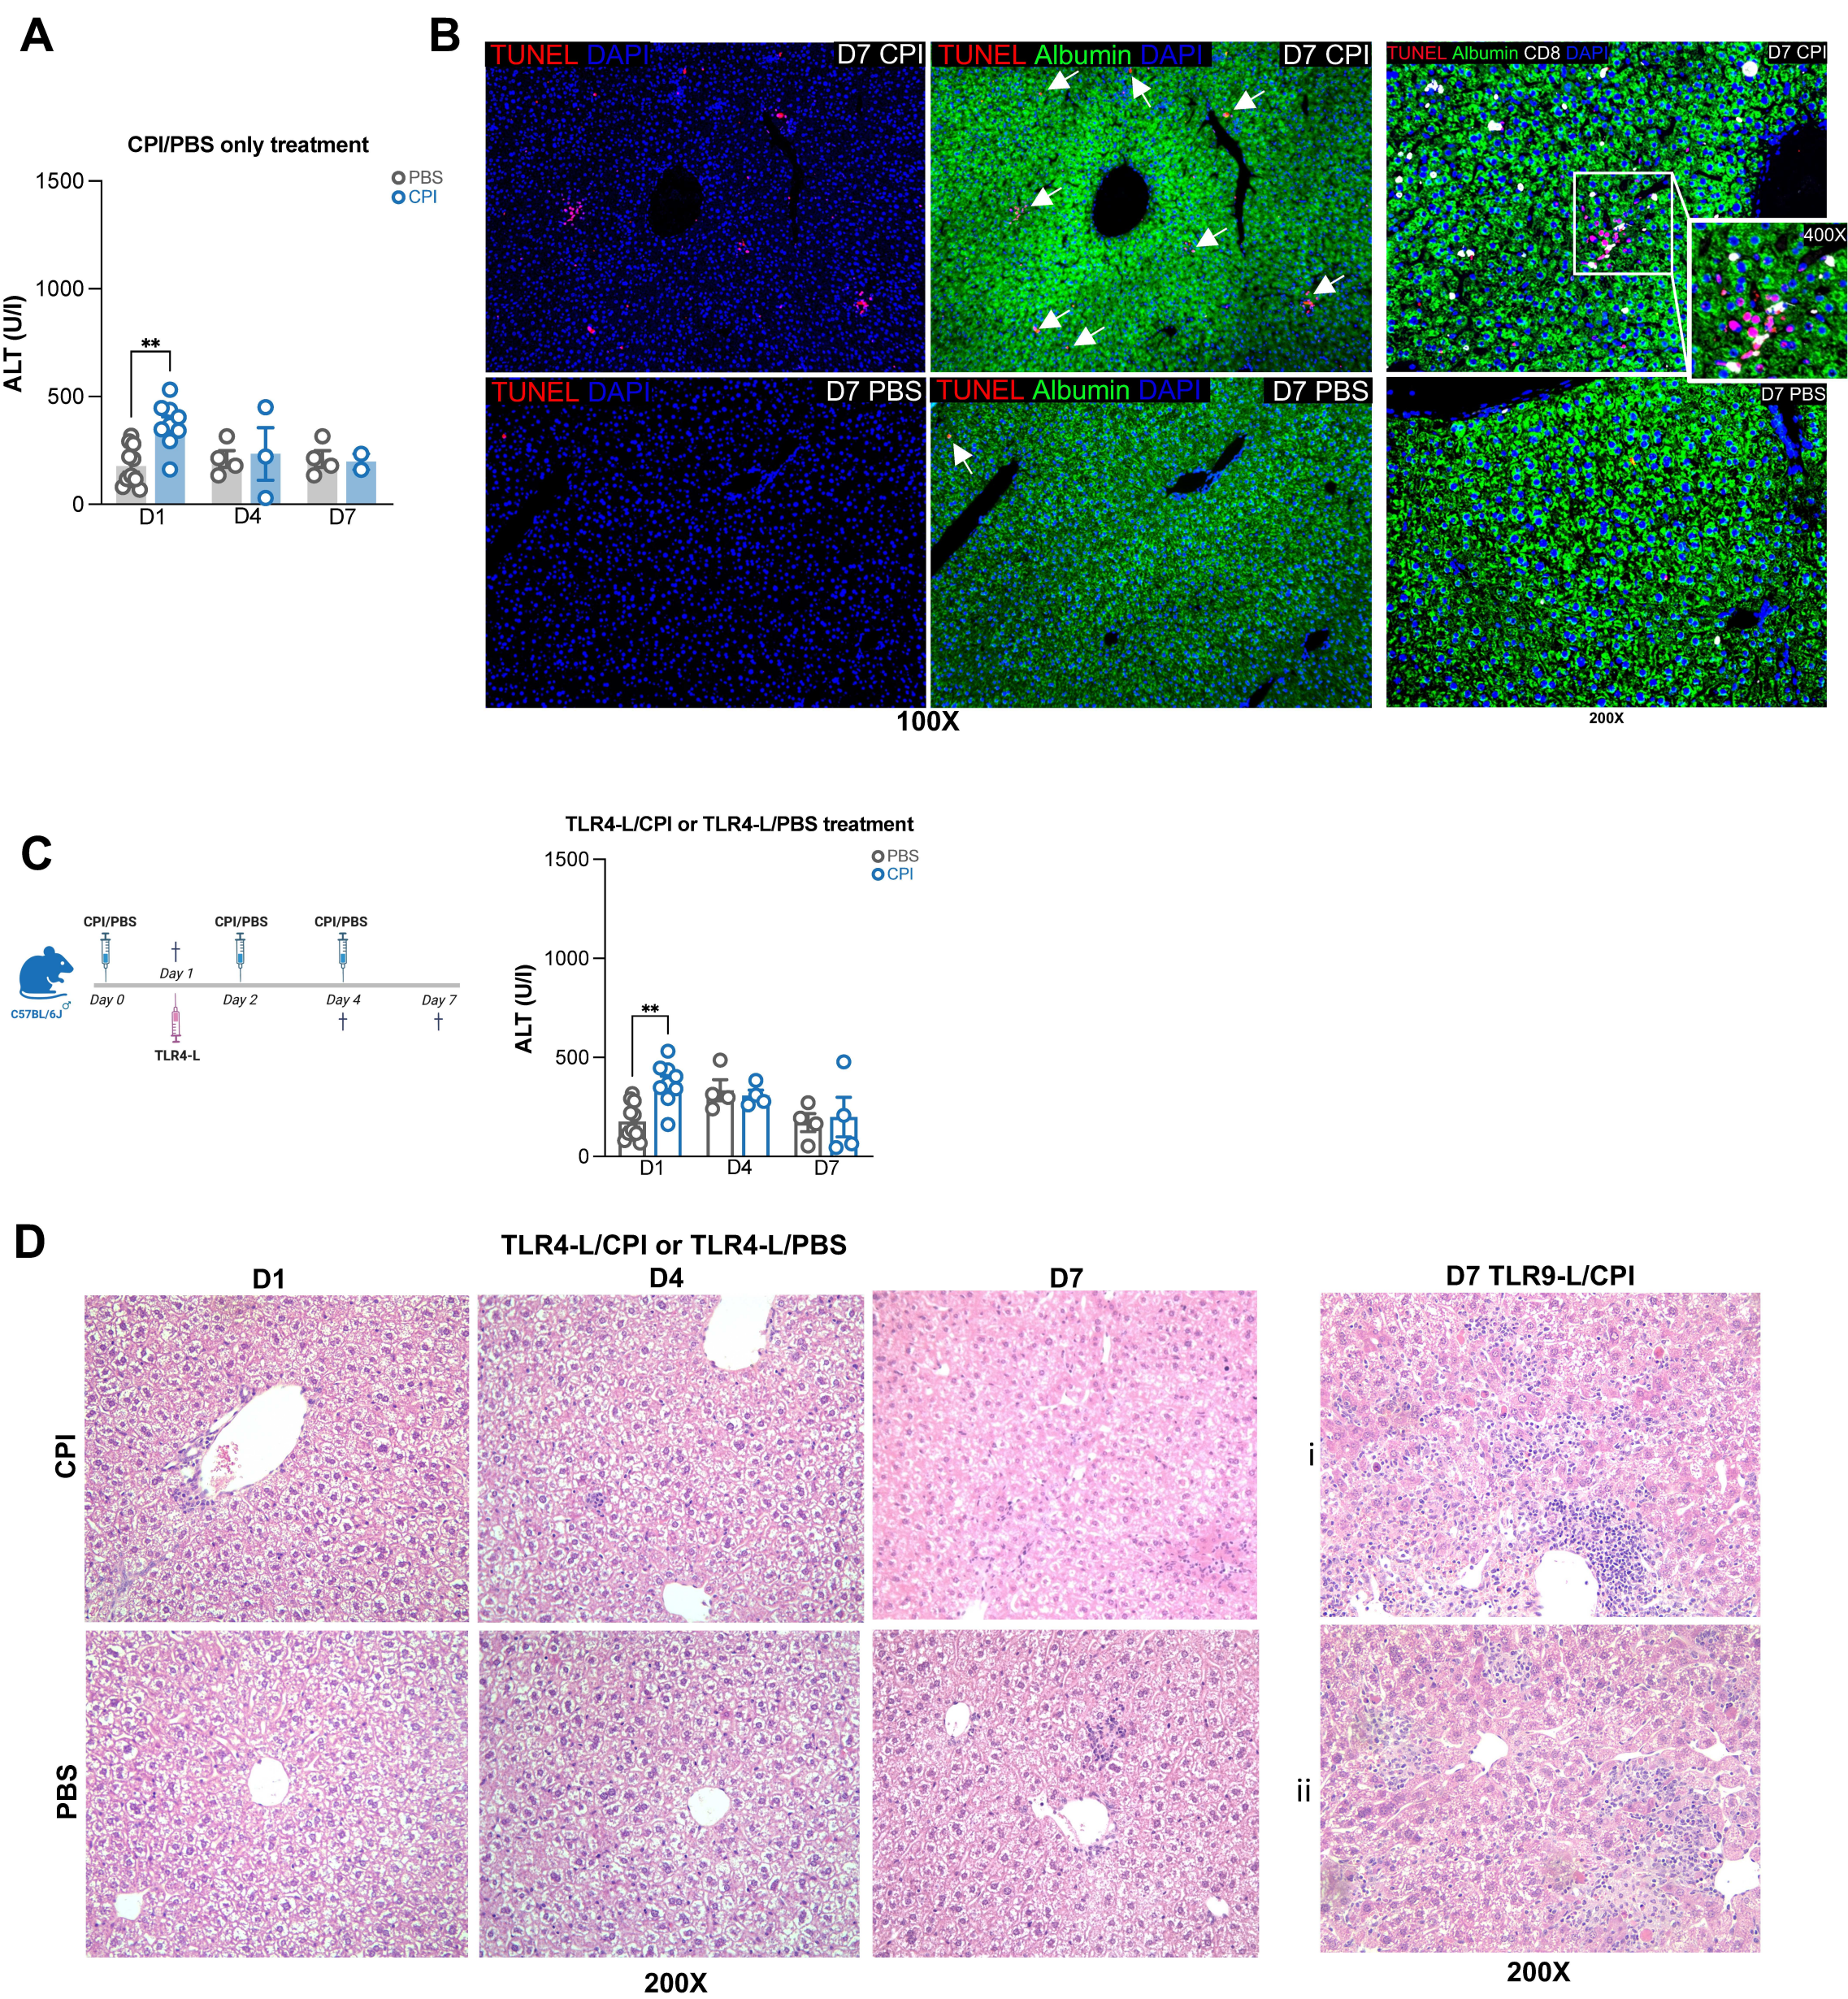

Supplement: inline-supplementary-material-2 [file inline-supplementary-material-2.pdf]
